# Supplementary material
Source: publisher figshare collection journal article supplement (https://acs.figshare.com/ndownloader/files/34698460)
Supplement: Supplementary file 1 [file 34698460]

## Sheet: S2.1_Index
An assessment of non-occupational 1,4-dioxane exposure pathways from drinking water and product use Daniel Dawson1*, Hunter Fisher1,2, Abigail E. Noble3, Qingyu Meng3, Anne Cooper Doherty3, Yuko Sakano3, Daniel Vallero1, Rogelio Tornero-Velez1, Elaine A. Cohen Hubal1 1U.S. Environmental Protection Agency, Office of Research and Development, 109 T.W. Alexander Drive, Research Triangle Park, NC 277…
Supplemental Information 2
Description	This excel file contains data used in parameterizing the SHEDS-HT, and supplemental results in tabular and graphical form.
Index
Page	Description
S2.2	1,4 dioxane concentration consumer product dataset used to estimate 1,4 dioxane concentration in products and the high bound of Prevalenceproducts
S2.3	Equations used in SHEDS-HT to estimate exposure and absorption
S2.4	List of ethoxylated chemical proxies used in lower bound of chemical prevalence assumption
S2.5	Fractions of tapwater making up NHANES food categories used in calculating the role of food in water consumption
S2.6	Human exposure and down-the-drain mass release summary statistics
S2.7	Statistical results tables of factorial Analyses of Variance for (A) human exposure and (B) down-the-drain mass released
S2.8	Proportions of human exposure and down-the-drain mass released due to contaminated water
S2.9	Statistical analyses of proportions of human exposure(A) and down-the-drain mass released(B) due to factorial conditions. Tables include results of Beta Regression (A1,B1) and Cohen's D effect size(A2,B2).
S2.10	Model evaluation results, including tables and figures of empirical wastewater concentrations and projected wastewater concentrations based on down the drain values
S2.11	Results of ad hoc simulations run to evaluate the influence of the parameter descripting fraction absorbed through the lungs. Tables include human exposure values (A) and proportion attributable to water contamination (B), along with a comparison with estimates made with default SHEDS-HT values

## Sheet: S2.2_ConsumerProductData
Product Category	Product Description	Brand Name	Detection Value (ppm)	Detect/ND	Detection Limit (ppm)	Year Analyzed	Reference
personal care	body wash	Burt’s Bees Lavender Honey Body Wash	0.0125	Non-detect	0.025	2019	Citizens Campaign for the Environment 2019
personal care	body wash	Dove Go Fresh Body Wash (Cucumber and Green Tea)	0.0125	Non-detect	0.025	2019	Citizens Campaign for the Environment 2019
personal care	body wash	Dr. Bronner’s Hemp Peppermint Soap	0.0125	Non-detect	0.025	2019	Citizens Campaign for the Environment 2019
personal care	body wash	Method Body Wash (with Avocado Extract)	0.0125	Non-detect	0.025	2019	Citizens Campaign for the Environment 2019
personal care	body wash	Bath and Body Works Shower Gel (Sonoma Weekend Escape)	0.63	Detect	0.025	2019	Citizens Campaign for the Environment 2019
personal care	body wash	Johnson’s Baby Shampoo	0.87	Detect	0.025	2019	Citizens Campaign for the Environment 2019
personal care	body wash	Nivea Care and Hibiscus Body Wash	1	Detect	0.025	2019	Citizens Campaign for the Environment 2019
personal care	body wash	Smartly Meadow Scented Bosh Wash [Target Brand]	1.2	Detect	0.025	2019	Citizens Campaign for the Environment 2019
personal care	body wash	Philosophy Love Body Wash	1.5	Detect	0.025	2019	Citizens Campaign for the Environment 2019
personal care	body wash	Caress Daily Silk Body Wash	1.7	Detect	0.025	2019	Citizens Campaign for the Environment 2019
personal care	body wash	Suave Essentials Body Wash (Wild Cherry Blossom)	2	Detect	0.025	2019	Citizens Campaign for the Environment 2019
personal care	body wash	St. Ives Oatmeal and Shea Butter	2	Detect	0.025	2019	Citizens Campaign for the Environment 2019
personal care	body wash	Suave Sport Body Wash	2	Detect	0.025	2019	Citizens Campaign for the Environment 2019
personal care	body wash	Neutrogena Rainbath Shower and Bath Gel	2.2	Detect	0.025	2019	Citizens Campaign for the Environment 2019
personal care	body wash	Irish Springs Shower Gel	3	Detect	0.025	2019	Citizens Campaign for the Environment 2019
personal care	body wash	Dr. Teal’s Pink Himalayan Foaming Bath	3.4	Detect	0.025	2019	Citizens Campaign for the Environment 2019
personal care	body wash	Olay Moisture Ribbons Plus Body Wash	3.5	Detect	0.025	2019	Citizens Campaign for the Environment 2019
personal care	body wash	Victoria’s Secret (Love Fragrance Wash)	16	Detect	0.025	2019	Citizens Campaign for the Environment 2019
personal care	body wash	Victoria’s Secret (Bombshell Fragrance Wash)	17	Detect	0.025	2019	Citizens Campaign for the Environment 2019
personal care	body wash	Angel of Mine Baby Bath [Dollar]	1.4	Detect	0.025	2019	Citizens Campaign for the Environment 2019
personal care	body wash	Modesa Coconut Ginger Body Wash[Dollar Tree]	1.4	Detect	0.025	2019	Citizens Campaign for the Environment 2019
personal care	body wash	Inspire Premium Surge Body Wash [Dollar Tree]	1.4	Detect	0.025	2019	Citizens Campaign for the Environment 2019
personal care	body wash	Soft Whisper by Power Stick (Pomegranate Lemon Verbena) [Dollar Tree]	2.2	Detect	0.025	2019	Citizens Campaign for the Environment 2019
personal care	body wash	Inspire Fresh Water Moisturizing Body Wash [Dollar Tree]	2.6	Detect	0.025	2019	Citizens Campaign for the Environment 2019
personal care	body wash and shampoo	Aveeno Baby Gentle Wash and Shampoo	0.0125	Non-detect	0.025	2019	Citizens Campaign for the Environment 2019
personal care	body wash and shampoo	Honest Company Shampoo and Body Wash	0.0125	Non-detect	0.025	2019	Citizens Campaign for the Environment 2019
personal care	body wash and shampoo	Mustela Gentle Cleansing Gel	0.9	Detect	0.025	2019	Citizens Campaign for the Environment 2019
personal care	body wash and shampoo	Axe Phoenix Shower Gel/Shampoo	2.4	Detect	0.025	2019	Citizens Campaign for the Environment 2019
personal care	body wash and shampoo	Old Spice Swagger Shower Gel/Shampoo	2.5	Detect	0.025	2019	Citizens Campaign for the Environment 2019
personal care	body wash and shampoo	Baby Magic Hair and Body Wash (Original)	7.6	Detect	0.025	2019	Citizens Campaign for the Environment 2019
personal care	body wash and shampoo	Power Stick Cool Blast Shower Gel/Shampoo [Dollar Tree]	0.8	Detect	0.025	2019	Citizens Campaign for the Environment 2019
personal care	body wash and shampoo	Sesame Street Baby Wash [Dollar Tree]	2.1	Detect	0.025	2019	Citizens Campaign for the Environment 2019
personal care	bubble bath	Babyganics Bubble Bath	0.0125	Non-detect	0.025	2019	Citizens Campaign for the Environment 2019
personal care	bubble bath	Original Bubble Mr. Bubble	0.59	Detect	0.025	2019	Citizens Campaign for the Environment 2019
personal care	bubble bath	Disney Frozen Bubble Bath	0.81	Detect	0.025	2019	Citizens Campaign for the Environment 2019
cleaning	dish detergent	Ajax	2.5	Detect	0.025	2019	Citizens Campaign for the Environment 2019
cleaning	dish detergent	Palmolive Raspberry Coconut	2.8	Detect	0.025	2019	Citizens Campaign for the Environment 2019
cleaning	dish detergent	Dawn	3.6	Detect	0.025	2019	Citizens Campaign for the Environment 2019
cleaning	dish detergent	Up & Up Free and Clear [Target Brand]	6.4	Detect	0.025	2019	Citizens Campaign for the Environment 2019
cleaning	dish detergent	The Home Store Lemon Scented [Dollar Tree]	7.7	Detect	0.025	2019	Citizens Campaign for the Environment 2019
cleaning	fabric softener	Ultra Downy April Fresh (Fabric Softener)	0.0125	Non-detect	0.025	2019	Citizens Campaign for the Environment 2019
personal care	hand soap	RJ Walkins (Aloe and Green Tea)	0.34	Detect	0.025	2019	Citizens Campaign for the Environment 2019
personal care	hand soap	Dial Coconut Water and Mango	0.99	Detect	0.025	2019	Citizens Campaign for the Environment 2019
personal care	hand soap	Soft Soap Fresh Breeze	1.9	Detect	0.025	2019	Citizens Campaign for the Environment 2019
cleaning	laundry detergent	Mrs. Meyer’s (Lavender Scent)	0.0125	Non-detect	0.025	2019	Citizens Campaign for the Environment 2019
cleaning	laundry detergent	Nature’s Promise Free and Clear	0.0125	Non-detect	0.025	2019	Citizens Campaign for the Environment 2019
cleaning	laundry detergent	Seventh Generation (Free and Clear)	0.0125	Non-detect	0.025	2019	Citizens Campaign for the Environment 2019
cleaning	laundry detergent	Suavitel (Field Flowers)	0.0125	Non-detect	0.025	2019	Citizens Campaign for the Environment 2019
cleaning	laundry detergent	Method (Ginger Mango)	0.22	Detect	0.025	2019	Citizens Campaign for the Environment 2019
cleaning	laundry detergent	Xtra (Tropical Passion)	0.89	Detect	0.025	2019	Citizens Campaign for the Environment 2019
cleaning	laundry detergent	Purex plus Oxi Stain Removers (Fresh Morning Burst)	2	Detect	0.025	2019	Citizens Campaign for the Environment 2019
cleaning	laundry detergent	Arm and Hammer (Clean Burst, 2x Concentrated)	2.8	Detect	0.025	2019	Citizens Campaign for the Environment 2019
cleaning	laundry detergent	Up & Up Fresh Linen [Target Brand]	4.3	Detect	0.025	2019	Citizens Campaign for the Environment 2019
cleaning	laundry detergent	All with Stain Lifters (Fresh Rain)	5.2	Detect	0.025	2019	Citizens Campaign for the Environment 2019
cleaning	laundry detergent	Tide Simply plus Oxi (Refreshing Breeze)	8.3	Detect	0.025	2019	Citizens Campaign for the Environment 2019
cleaning	laundry detergent	Gain Original	10	Detect	0.025	2019	Citizens Campaign for the Environment 2019
cleaning	laundry detergent	2X Ultra Ivory Snow (Gentle Care)	11	Detect	0.025	2019	Citizens Campaign for the Environment 2019
cleaning	laundry detergent	Tide Original	14	Detect	0.025	2019	Citizens Campaign for the Environment 2019
cleaning	laundry detergent	LA’s Totally Awesome [Dollar Tree]	2.8	Detect	0.025	2019	Citizens Campaign for the Environment 2019
cleaning	laundry detergent	Homeline Original [Family Dollar]	5.4	Detect	0.025	2019	Citizens Campaign for the Environment 2019
cleaning	laundry detergent	Persil Original [Family Dollar]	6.1	Detect	0.025	2019	Citizens Campaign for the Environment 2019
cleaning	laundry detergent	Dreft (Stage 1/Newborn)	10	Detect	0.025	2019	Citizens Campaign for the Environment 2019
personal care	shampoo	Aveeno Active Minerals Pure Renewal	0.0125	Non-detect	0.025	2019	Citizens Campaign for the Environment 2019
personal care	shampoo	Cantu Shea Butter for Natural Hair	0.0125	Non-detect	0.025	2019	Citizens Campaign for the Environment 2019
personal care	shampoo	Shea Butter Moisture Coconut and Hibiscus Curl & Shine	0.0125	Non-detect	0.025	2019	Citizens Campaign for the Environment 2019
personal care	shampoo	Garnier Fructis with Active Fruit Protein	0.4	Detect	0.025	2019	Citizens Campaign for the Environment 2019
personal care	shampoo	L’Oreal Elvive Total Repair	1.4	Detect	0.025	2019	Citizens Campaign for the Environment 2019
personal care	shampoo	Suave Professionals Moroccan Infusion (Color Care)	1.4	Detect	0.025	2019	Citizens Campaign for the Environment 2019
personal care	shampoo	Tresemme Moisture Rich with Vitamin E	1.5	Detect	0.025	2019	Citizens Campaign for the Environment 2019
personal care	shampoo	Head and Shoulders Classic Clean	1.7	Detect	0.025	2019	Citizens Campaign for the Environment 2019
personal care	shampoo	Dove Nutritive Solutions (Coconut and Hydration)	2.2	Detect	0.025	2019	Citizens Campaign for the Environment 2019
personal care	shampoo	John Frieda Brilliant Brunette	2.4	Detect	0.025	2019	Citizens Campaign for the Environment 2019
personal care	shampoo	OGX Lavender Platinum	2.4	Detect	0.025	2019	Citizens Campaign for the Environment 2019
personal care	shampoo	Love Beauty and Planet Argan Oil and Lavender	2.9	Detect	0.025	2019	Citizens Campaign for the Environment 2019
personal care	shampoo	Selsun Blue Dandruff Shampoo	3.1	Detect	0.025	2019	Citizens Campaign for the Environment 2019
personal care	shampoo	VO5 Passion Fruit Smoothie	3.4	Detect	0.025	2019	Citizens Campaign for the Environment 2019
personal care	shampoo	Herbal Essences Platinum	4.2	Detect	0.025	2019	Citizens Campaign for the Environment 2019
personal care	shampoo	Pantene Pro-V Nature Fusion	5.5	Detect	0.025	2019	Citizens Campaign for the Environment 2019
personal care	shampoo	Silkience Vitamin B5 and Avocado Oil [Dollar Tree]	0.98	Detect	0.025	2019	Citizens Campaign for the Environment 2019
personal care	shampoo	White Rain Ocean Mist [Dollar Tree]	1.1	Detect	0.025	2019	Citizens Campaign for the Environment 2019
personal care	baby wipes	Huggies Naturally Refreshing Cucumber & Green Tea Baby Wipes (Kimberly-Clark)	0.125	Non-detect	unknown	2009	Sarantis et al. 2009
personal care	baby wipes	Huggies Soft Skin – Shea Butter (Kimberly-Clark Global Sales Inc)	0.125	Non-detect	unknown	2009	Sarantis et al. 2009
personal care	baby wipes	Kirkland Signature Premium Unscented Baby Wipes (Costco Wholesale Corporation)	0.125	Non-detect	unknown	2009	Sarantis et al. 2009
personal care	baby wipes	Pampers Baby Fresh (Procter & Gamble)	0.125	Non-detect	unknown	2009	Sarantis et al. 2009
personal care	baby wipes	Pampers Calming – Lavender (Procter & Gamble)	0.125	Non-detect	unknown	2009	Sarantis et al. 2009
personal care	body wash	Equate Tearless Baby Wash (Wal-Mart Stores, Inc.)	0.63	Detect	unknown	2009	Sarantis et al. 2009
personal care	body wash	CVS Kids Body Wash – Blueberry Blast (CVS/Pharmacy)	0.75	Detect	unknown	2009	Sarantis et al. 2009
personal care	body wash	Aveeno Baby Soothing Relief Creamy Wash (Johnson & Johnson Consumer Companies)	1.4	Detect	unknown	2009	Sarantis et al. 2009
personal care	body wash	Aveeno Baby Soothing Relief Creamy Wash (Johnson & Johnson Consumer Companies)	1.7	Detect	unknown	2009	Sarantis et al. 2009
personal care	body wash	Grins & Giggles Milk & Honey Baby Wash (Gerber Products Company)	2.8	Detect	unknown	2009	Sarantis et al. 2009
personal care	body wash	Mustela Baby Shampoo (Laboratories Expanscience)	2.8	Detect	unknown	2009	Sarantis et al. 2009
personal care	body wash	Huggies Naturally Refreshing Cucumber & Green Tea Baby Wash (Kimberly-Clark)	3.2	Detect	unknown	2009	Sarantis et al. 2009
personal care	body wash	Night-time Bath Baby Wash (Target Corporation)	3.6	Detect	unknown	2009	Sarantis et al. 2009
personal care	body wash	Johnson’s Moisture Care Baby Wash (Johnson & Johnson Consumer Companies)	3.9	Detect	unknown	2009	Sarantis et al. 2009
personal care	body wash	Mustela Dermo-Cleansing Gel for Hair and Body Newborn/Baby (Laboratories Expanscience)	3.9	Detect	unknown	2009	Sarantis et al. 2009
personal care	body wash	Johnson’s Oatmeal Baby Wash – Vanilla (Johnson & Johnson Consumer Companies)	4.2	Detect	unknown	2009	Sarantis et al. 2009
personal care	body wash	Aveeno Baby Soothing Relief Creamy Wash (Johnson & Johnson Consumer Companies)	4.6	Detect	unknown	2009	Sarantis et al. 2009
personal care	body wash	American Girl Real Beauty Inside and Out Shower Gel – Apple Blossom (Bath & Body Works)	5.7	Detect	unknown	2009	Sarantis et al. 2009
personal care	body wash	American Girl Real Beauty Inside and Out Shower Gel – Apple Blossom (Bath & Body Works)	6.3	Detect	unknown	2009	Sarantis et al. 2009
personal care	body wash	Gentle Naturals Eczema Baby Wash (Del Pharmaceuticals, Inc.)	6.4	Detect	unknown	2009	Sarantis et al. 2009
personal care	body wash	American Girl Hopes and Dreams Glistening Shower and Bath Wash (Bath & Body Works)	14	Detect	unknown	2009	Sarantis et al. 2009
personal care	body wash	American Girl Real Beauty Inside and Out Shower Gel – Apple Blossom (Bath & Body Works)	18	Detect	unknown	2009	Sarantis et al. 2009
personal care	body wash	American Girl Real Beauty Inside and Out Shower Gel – Sunny Orange (Bath & Body Works)	35	Detect	unknown	2009	Sarantis et al. 2009
personal care	bubble bath	Barbie Berry Sweet Bubble Bath (Water-Jel Technologies)	0.65	Detect	unknown	2009	Sarantis et al. 2009
personal care	bubble bath	Dora the Explorer Bubble Bath (MZB Personal Care)	1.5	Detect	unknown	2009	Sarantis et al. 2009
personal care	bubble bath	Mustela Multi-Sensory Bubble Bath (Laboratories Expanscience)	1.7	Detect	unknown	2009	Sarantis et al. 2009
personal care	bubble bath	Hot Wheels Berry Blast Bubble Bath (Water-Jel Technologies)	2.8	Detect	unknown	2009	Sarantis et al. 2009
personal care	bubble bath	Sesame Street Bubble Bath – Orange Mango Tango (The Village Company)	2.8	Detect	unknown	2009	Sarantis et al. 2009
personal care	bubble bath	Tinker Bell Scented Bubble Bath (Goldie LLC)	11	Detect	unknown	2009	Sarantis et al. 2009
personal care	hair relaxer	Dark & Lovely Kids Beautiful Beginnings No-Mistake Nourishing No-Lye Creme Relaxer, Normal to Course Hair (SoftSheen-Carson, owned by L’Oreal USA)	0.125	Non-detect	unknown	2009	Sarantis et al. 2009
personal care	hair relaxer	Dark & Lovely Kids Beautiful Beginnings No-Mistake Nourishing No-Lye Children’s Relaxer System, Fine Hair Types (SoftSheen-Carson, owned by L’Oreal USA)	0.125	Non-detect	unknown	2009	Sarantis et al. 2009
personal care	hair relaxer	Soft & Beautiful Just for Me! No-Lye Conditioning Creme Relaxer, Children’s Super (Alberto-Culver Company)	0.27	Detect	unknown	2009	Sarantis et al. 2009
personal care	hand soap	Pampers Kandoo Foaming Handsoap – Magic Melon (Procter & Gamble)	0.49	Detect	unknown	2009	Sarantis et al. 2009
personal care	lotion	American Girl Hopes and Dreams Shimmer Body Lotion (Bath & Body Works)	0.125	Non-detect	unknown	2009	Sarantis et al. 2009
personal care	lotion	Baby Magic “Soft Baby Scent” Baby Lotion (Ascendia Brands, Inc)	0.125	Non-detect	unknown	2009	Sarantis et al. 2009
personal care	lotion	Johnson’s Bedtime Lotion Natural Calm Essences (Johnson & Johnson Consumer Companies)	0.125	Non-detect	unknown	2009	Sarantis et al. 2009
personal care	lotion	Mustela Baby Body Lotion (Laboratories Expanscience)	0.125	Non-detect	unknown	2009	Sarantis et al. 2009
personal care	lotion	Tinker Bell Body Lotion (Goldie LLC)	0.125	Non-detect	unknown	2009	Sarantis et al. 2009
personal care	lotion	Baby Magic “Soft Baby Scent” Baby Lotion (Ascendia Brands, Inc)	0.92	Detect	unknown	2009	Sarantis et al. 2009
personal care	shampoo	Johnson’s Baby Shampoo (Johnson & Johnson Consumer Companies)	0.125	Non-detect	unknown	2009	Sarantis et al. 2009
personal care	shampoo	Suave Kids 2-in-1 Shampoo – Wild Watermelon (Unilever)	0.69	Detect	unknown	2009	Sarantis et al. 2009
personal care	shampoo	CVS Baby Shampoo (CVS/Pharmacy)	0.92	Detect	unknown	2009	Sarantis et al. 2009
personal care	shampoo	L’Oreal Kids Extra Gentle 2-in-1 Fast Dry Shampoo – Burst of Cool Melon (L’Oreal USA)	0.95	Detect	unknown	2009	Sarantis et al. 2009
personal care	shampoo	Johnson’s Baby Shampoo (Johnson & Johnson Consumer Companies)	1.1	Detect	unknown	2009	Sarantis et al. 2009
personal care	sun block	Banana Boat Kids UVA & UVB Sunblock Lotion SPF 30 (Sun Pharmaceuticals Corp.)	0.125	Non-detect	unknown	2009	Sarantis et al. 2009
personal care	sun block	No-Ad Sun Pals SPF 45 UVA/UVB Sun Protection (Solar Cosmetics Labs Inc.)	0.46	Detect	unknown	2009	Sarantis et al. 2009
personal care	toothpaste	Colgate Kids 2-in-1 Toothpaste and Mouthwash – Strawberry (Colgate-Palmolive Company)	0.125	Non-detect	unknown	2009	Sarantis et al. 2009
personal care	bubble bath	See reference	0.1	Non-detect	0.2	2019	Zhou 2019
personal care	bubble bath	See reference	0.31	Detect	0.2	2019	Zhou 2019
personal care	bubble bath	See reference	0.42	Detect	0.2	2019	Zhou 2019
personal care	bubble bath	See reference	0.48	Detect	0.2	2019	Zhou 2019
personal care	bubble bath	See reference	0.64	Detect	0.2	2019	Zhou 2019
personal care	bubble bath	See reference	0.65	Detect	0.2	2019	Zhou 2019
personal care	bubble bath	See reference	0.71	Detect	0.2	2019	Zhou 2019
personal care	bubble bath	See reference	0.76	Detect	0.2	2019	Zhou 2019
personal care	bubble bath	See reference	0.79	Detect	0.2	2019	Zhou 2019
personal care	bubble bath	See reference	0.79	Detect	0.2	2019	Zhou 2019
personal care	bubble bath	See reference	0.8	Detect	0.2	2019	Zhou 2019
personal care	bubble bath	See reference	0.82	Detect	0.2	2019	Zhou 2019
personal care	bubble bath	See reference	1.1	Detect	0.2	2019	Zhou 2019
personal care	bubble bath	See reference	1.14	Detect	0.2	2019	Zhou 2019
personal care	bubble bath	See reference	1.17	Detect	0.2	2019	Zhou 2019
personal care	bubble bath	See reference	1.21	Detect	0.2	2019	Zhou 2019
personal care	bubble bath	See reference	1.26	Detect	0.2	2019	Zhou 2019
personal care	bubble bath	See reference	1.69	Detect	0.2	2019	Zhou 2019
personal care	bubble bath	See reference	2.97	Detect	0.2	2019	Zhou 2019
personal care	bubble bath	See reference	10.3	Detect	0.2	2019	Zhou 2019
personal care	Hair treatment	See reference	0.1	Non-detect	0.2	2019	Zhou 2019
personal care	Hair treatment	See reference	0.1	Non-detect	0.2	2019	Zhou 2019
personal care	Hair treatment	See reference	0.1	Non-detect	0.2	2019	Zhou 2019
personal care	Hair treatment	See reference	0.1	Non-detect	0.2	2019	Zhou 2019
personal care	Hair treatment	See reference	0.1	Non-detect	0.2	2019	Zhou 2019
personal care	Hair treatment	See reference	0.1	Non-detect	0.2	2019	Zhou 2019
personal care	Hair treatment	See reference	0.1	Non-detect	0.2	2019	Zhou 2019
personal care	Hair treatment	See reference	0.1	Non-detect	0.2	2019	Zhou 2019
personal care	Hair treatment	See reference	0.1	Non-detect	0.2	2019	Zhou 2019
personal care	Hair treatment	See reference	0.1	Non-detect	0.2	2019	Zhou 2019
personal care	Hair treatment	See reference	0.1	Non-detect	0.2	2019	Zhou 2019
personal care	Hair treatment	See reference	0.1	Non-detect	0.2	2019	Zhou 2019
personal care	Hair treatment	See reference	0.27	Detect	0.2	2019	Zhou 2019
personal care	Hair treatment	See reference	1.66	Detect	0.2	2019	Zhou 2019
personal care	lotion	See reference	0.1	Non-detect	0.2	2019	Zhou 2019
personal care	lotion	See reference	0.1	Non-detect	0.2	2019	Zhou 2019
personal care	lotion	See reference	0.1	Non-detect	0.2	2019	Zhou 2019
personal care	lotion	See reference	0.1	Non-detect	0.2	2019	Zhou 2019
personal care	lotion	See reference	0.1	Non-detect	0.2	2019	Zhou 2019
personal care	lotion	See reference	0.1	Non-detect	0.2	2019	Zhou 2019
personal care	lotion	See reference	0.1	Non-detect	0.2	2019	Zhou 2019
personal care	lotion	See reference	0.1	Non-detect	0.2	2019	Zhou 2019
personal care	lotion	See reference	0.1	Non-detect	0.2	2019	Zhou 2019
personal care	lotion	See reference	0.1	Non-detect	0.2	2019	Zhou 2019
personal care	lotion	See reference	0.1	Non-detect	0.2	2019	Zhou 2019
personal care	lotion	See reference	0.1	Non-detect	0.2	2019	Zhou 2019
personal care	lotion	See reference	0.1	Non-detect	0.2	2019	Zhou 2019
personal care	lotion	See reference	0.1	Non-detect	0.2	2019	Zhou 2019
personal care	lotion	See reference	0.1	Non-detect	0.2	2019	Zhou 2019
personal care	lotion	See reference	0.1	Non-detect	0.2	2019	Zhou 2019
personal care	lotion	See reference	0.1	Non-detect	0.2	2019	Zhou 2019
personal care	lotion	See reference	0.1	Non-detect	0.2	2019	Zhou 2019
personal care	lotion	See reference	0.23	Detect	0.2	2019	Zhou 2019
personal care	lotion	See reference	0.74	Detect	0.2	2019	Zhou 2019
personal care	Other	See reference	0.1	Non-detect	0.2	2019	Zhou 2019
personal care	Other	See reference	0.1	Non-detect	0.2	2019	Zhou 2019
personal care	Other	See reference	1.53	Detect	0.2	2019	Zhou 2019
personal care	Washes	See reference	0.1	Non-detect	0.2	2019	Zhou 2019
personal care	Washes	See reference	0.39	Detect	0.2	2019	Zhou 2019
personal care	Washes	See reference	0.44	Detect	0.2	2019	Zhou 2019
personal care	Washes	See reference	0.47	Detect	0.2	2019	Zhou 2019
personal care	Washes	See reference	0.5	Detect	0.2	2019	Zhou 2019
personal care	Washes	See reference	0.51	Detect	0.2	2019	Zhou 2019
personal care	Washes	See reference	0.55	Detect	0.2	2019	Zhou 2019
personal care	Washes	See reference	0.61	Detect	0.2	2019	Zhou 2019
personal care	Washes	See reference	0.67	Detect	0.2	2019	Zhou 2019
personal care	Washes	See reference	0.73	Detect	0.2	2019	Zhou 2019
personal care	Washes	See reference	0.8	Detect	0.2	2019	Zhou 2019
personal care	Washes	See reference	0.83	Detect	0.2	2019	Zhou 2019
personal care	Washes	See reference	0.94	Detect	0.2	2019	Zhou 2019
personal care	Washes	See reference	1.1	Detect	0.2	2019	Zhou 2019
personal care	Washes	See reference	1.11	Detect	0.2	2019	Zhou 2019
personal care	Washes	See reference	1.14	Detect	0.2	2019	Zhou 2019
personal care	Washes	See reference	1.17	Detect	0.2	2019	Zhou 2019
personal care	Washes	See reference	1.35	Detect	0.2	2019	Zhou 2019
personal care	Washes	See reference	1.88	Detect	0.2	2019	Zhou 2019
personal care	Washes	See reference	2	Detect	0.2	2019	Zhou 2019
personal care	Washes	See reference	2.08	Detect	0.2	2019	Zhou 2019
personal care	Washes	See reference	2.72	Detect	0.2	2019	Zhou 2019
personal care	Washes	See reference	2.79	Detect	0.2	2019	Zhou 2019
personal care	Washes	See reference	15.3	Detect	0.2	2019	Zhou 2019

## Sheet: S2.3-SHEDS-HT Equations
Exposure Scenario	Parameters	Explanation
Food Residue	exp.diet	dietary exposure from food residues (ug/day)
	consumption	amount of food consumed (g/day; ml/day of water used here)
	residue	chemical residue in food (ug/g)
	exp.hand.mouth	ingestion from hand to mouth exposure; part of dermal module
	exp.ingest.tot	total exposure from ingestion
	ingest.abs.f	fraction of exposure absorbed through ingestion
	dose.ingest.abs	dose absorbed (ug/day)
Vapor inhalation	𝑎𝑖𝑟.𝑐𝑜𝑛𝑐	chemical concentration in air [g/m3]
	𝑚𝑎𝑠𝑠	product mass released per use [g]
	𝑐ℎ𝑒𝑚.𝑝𝑟𝑒𝑣	likelihood of chemical being in this product [-]
	𝑓.𝑐ℎ𝑒𝑚𝑖𝑐𝑎𝑙	ratio of chemical mass to product mass (if not zero) [-]
	𝑣𝑎𝑝𝑓𝑟𝑎𝑐	ratio of vapor pressure to air pressure
	𝑣𝑜𝑙𝑢𝑚𝑒	volume into which the aerosol disperses during use [m3]
	exp.vapor	inhalation exposure from vapor [μg/day]
	𝑢𝑠𝑒.𝑝𝑟𝑒𝑣	fraction of population who are users [-]
	𝑢𝑠𝑒.𝑓𝑟𝑒𝑞	use frequency [#/yr]
	365	conversion factor [days/yr]
	𝑑𝑢𝑟𝑎𝑡𝑖𝑜𝑛	duration of product use [min]
	1440	conversion factor [min/day]
	1E6	conversion from [ug] to [g]
	𝑑𝑜𝑠𝑒.𝑣𝑎𝑝𝑜𝑟	inhalation applied dose from vapor [μg/day]
	𝑒𝑥𝑝.𝑣𝑎𝑝𝑜𝑟	inhalation exposure from vapor [μg/m3]
	𝑏𝑣𝑎	basal ventilation rate [m3/day]
	p.round	probablistic rounding function
	𝑝𝑎𝑖	physical activity index; time averaged metabolic equivalent [-];
	inhal.abs.f	Assumed prportion aborbed through inhalation (0.16)
Dermal	𝑒𝑥𝑝.𝑑𝑒𝑟𝑚	direct dermal exposure [μg/day]
	𝑢𝑠𝑒.𝑝	fraction of population who are users [-]
	𝑢𝑠𝑒.𝑓	use frequency [#/yr]
	365	conversion factor [days/yr]
	𝑚𝑎𝑠𝑠	product mass released per use [g]
	𝑐ℎ𝑒𝑚.𝑝	likelihood of chemical being in this product [-]
	𝑓.𝑐ℎ𝑒𝑚	ratio of chemical mass to product mass (if not zero)[-]
	𝑓.𝑐𝑜𝑛tact	fraction of product contacting skin [-]
	𝑓.𝑟𝑒𝑠idual	residual fraction remaining on skin after use [-]
	1𝐸6	conversion from [g] to [μg]
	𝑟𝑒𝑚.𝑎𝑏𝑠𝑜𝑟𝑏	dermal absorption term[-]
	𝐾𝑝	dermal permeability from chem.props file [cm/hr]
	0.208	permeability of permethrin [cm/hr]
	𝑟𝑒𝑚.𝑚𝑜𝑢𝑡ℎ	hand-mouthing term[-]
	ℎ𝑚.𝑎𝑟𝑒𝑎	handmouth.area.f variable from exp.factors input file [-]
	ℎ𝑚.𝑓𝑟𝑒𝑞	handmouth.freq variable from exp.factors input file [#/hr]
	ℎ𝑤.𝑒𝑓𝑓	rem.handwash.f variable from exp.factors input file [-]
	𝑛ℎ𝑤	number of hand washes on given day [#/day]
	rem.bath.f	proportion assumed removed from bathing, sampled (Beta(4,1.36))
	rem.brushoff.f	propoprtion removed from brushoff, sampled (Triangle (0.01,0.25, 0.05))
	𝑟𝑒𝑚.𝑑𝑒𝑟𝑚.𝑎𝑏𝑠.𝑓	Absorption fraction, sampled (Triangle(0.001, 0.01, 0.004)
	dermal.dose.abs	Dermal dose aborbed (ug/day)
Total Exposure	Dose.intake.ug	Total daily absorbed dose in ug
	Total.Dose.intake.mg.kg	Total daily absorbed dose in mg/kg
	Weight	Weight of person in kg
Down-the-Drain (DTDE)	𝑑𝑑𝑑.𝑚𝑎𝑠𝑠	chemical mass “down the drain” [g/day]
	𝑢𝑠𝑒.𝑝𝑟𝑒𝑣	fraction of population who are users [-]
	𝑢𝑠𝑒.𝑓𝑟𝑒𝑞	use frequency [#/yr]
	365	conversion factor [days/yr]
	𝑐ℎ𝑒𝑚.𝑝𝑟𝑒𝑣	likelihood that this product contains this chemical [-]
	𝑓.𝑐ℎ𝑒𝑚	ratio of chemical mass to product mass (if not zero) [-]
	𝑚𝑎𝑠𝑠	mass of product released per use [g]
	𝑓.𝑑𝑟𝑎𝑖𝑛	fraction of mass entering waste system [-]

## Sheet: S2.4-Ethoxylated Proxies
CAS (if available)	DTXSID	Preferred Name
(C10-C16)Alkyl ethoxylate sulfuric acid, sodium salt	DTXSID2028725	Poly(oxy-1,2-ethanediyl), alpha-sulfo-omega-hydroxy-, C10-16-alkyl ethers, sodium salts
(C6-C10) Alkyl and C6 branched aliphatic alcohols, ethoxylated, propoxylated	DTXSID4041949	Alcohols, C6-10, ethoxylated propoxylated
11114-30-0	DTXSID3034325	C11-15-Secondary alcohols ethoxylated
125301-89-5	DTXSID901041670	POLY(OXY-1,2-ETHANEDIYL), ALPHA-SULFO-OMEGA-HYDROXY-, C12-15-ALKYL
1338929-66-0	DTXSID30892016	PEG-120 methyl glucose trioleate
143-22-6	DTXSID7021520	2-[2-(2-Butoxyethoxy)ethoxy]ethanol
153632-64-5	DTXSID90978406	Magnesium laureth 2-sulfate
155683-77-5	DTXSID401041699	OXIRANE, 2-METHYL-, POLYMER WITH OXIRANE, MONOISODECYL ETHER
156259-66-4	DTXSID4029563	Alcohols, C12-14-secondary, ethoxylated
16057-43-5	DTXSID90936344	2-[2-(Octadecyloxy)ethoxy]ethan-1-ol
2-(2-Ethoxyethoxy)ethanol	DTXSID2021941	2-(2-Ethoxyethoxy)ethanol
2-[2-[2-(dodeciloxi)etoxi]etoxi]etanol	DTXSID6058631	Triethylene glycol monododecyl ether
246538-83-0	DTXSID701042753	C20-40 PARETH-10
3,6,9,12,15,18,21,24,27,30,33,36-dodecaoxaoctatetracontane-1-ol	DTXSID50184647	Laureth-12
3,6,9,12,15,18,21,24,27,30-decaoxadotetracontan-1-ol	DTXSID30863903	3,6,9,12,15,18,21,24,27,30-decaoxadotetracontan-1-ol
3,6,9,12,15,18,21-Heptaoxatritriacontanol	DTXSID8062816	Heptaethylene glycol monododecyl ether
3,6,9,12,15-Pentaoxaheptacosan-1-ol	DTXSID1058632	3,6,9,12,15-Pentaoxaheptacosan-1-ol
3,6-Dioxa-1-decanol	DTXSID8021519	2-(2-Butoxyethoxy)ethanol
3,6-Dioxaoctane-1,8-diol	DTXSID4021393	Triethylene glycol
501019-91-6	DTXSID90891924	Poly(oxy-1,2-ethanediyl), alpha-hydro-omega-hydroxy-, mono-C8-10-alkyl ethers, ethers with 1,2-dodecanediol (1:1)
52501-07-2	DTXSID701026315	Aziridine, polymer with methyloxirane and oxirane
60001-13-0	DTXSID5041936	Alcohols, C14-15, ethoxylated
61791-13-7	DTXSID40891732	Alcohols, coco, ethoxylated
66455-15-0	DTXSID6041929	Alcohols, C10-14, ethoxylated
68081-91-4	DTXSID70894478	Poly(oxy-1,2-ethanediyl), .alpha.-sulfo-.omega.-hydroxy-, C12-18-alkyl ethers, sodium salts
68081-98-1	DTXSID0028377	Sulfuric acid, mono-C14-18-alkyl esters, sodium salts
68439-51-0	DTXSID4041947	Alcohols, C12-14, ethoxylated propoxylated
68458-88-8	DTXSID801010995	Polyoxyethylene (50) polyoxypropylene (12) lanolin
68526-94-3	DTXSID0041935	Alcohols, C12-20, ethoxylated
69011-36-5	DTXSID00110077	Polyoxyethylene trimethyldecyl alcohol
779349-84-7	DTXSID0049652	Ethoxylated isotridecanol
8051-46-5	DTXSID4049612	Fatty acids, coco, ethoxylated
83589-80-4	DTXSID101012457	Poly(oxy-1,2-ethanediyl), alpha-sulfo-omega-((1,1,3,3-tetramethylbutyl)phenoxy)-, sodium salt
900492-81-1	DTXSID7052810	Polyoxyethylene isodecyl ether
90736-95-1	DTXSID1027712	Polyethylene glycol monobutyl ether
96023-99-3	DTXSID5041934	Alcohols, C12-18, ethoxylated
Alcohols, C10-12, Ethoxylated	DTXSID4050439	Alcohols, C10-12, ethoxylated
Alcohols, C12-13-branched and linear, ethoxylated	DTXSID601036020	Alcohols, C12-13-branched and linear, ethoxylated
Alcohols, C12-15-branched and linear, ethoxylated propoxylated	DTXSID90106121	Alcohols, C12-15-branched and linear, ethoxylated propoxylated
Alcohols, C16-22, ethoxylated	DTXSID10894578	Alcohols, C16-22, ethoxylated
Alcohols, C7-21, ethoxylated	DTXSID3041588	Alcohols, C7-21, ethoxylated
Alcools en C12-13, ethoxyles	DTXSID5041930	Alcohols, C12-13, ethoxylated
Amines, C12-14-tert-alkyl, ethoxylated propoxylated	DTXSID00904433	Amines, C12-14-tert-alkyl, ethoxylated propoxylated
Butanedioic acid, sulfo-, mono(C10-C16)alkyl ethoxylated ester, disodium salt	DTXSID8029490	Poly(oxy-1,2-ethanediyl), .alpha.-(3-carboxy-1-oxosulfopropyl)-.omega.-hydroxy-, C10-16-alkyl ethers, disodium salts
C12-15 ethoxylated propoxylated alcohols	DTXSID8041585	C12-15 ethoxylated propoxylated alcohols
Deceth	DTXSID1029334	Polyethylene glycol monodecyl ether
Diethoxylated methyl glucopyranoside 2,6-dioleate	DTXSID10105313	Diethoxylated methyl glucopyranoside 2,6-dioleate
Dihydroxypropyl peg-5 linoleammonium chloride	DTXSID601016092	Dihydroxypropyl peg-5 linoleammonium chloride
Dobanol 91-8T	DTXSID9041944	Alcohols, C9-11, ethoxylated
EINECS 225-214-3	DTXSID0063573	Sulfuric acid, monododecyl ester, compd. with 2-aminoethanol (1:1)
EINECS 225-856-4	DTXSID3058618	Octaethylene glycol
Emulgen 1150S70	DTXSID5049732	Polyoxyethylene monoundecyl ether
Ethanol, 2-[2-(dodecyloxy)ethoxy]-, hydrogen sulfate, sodium salt	DTXSID0027519	Diethylene glycol monolauryl ether sulfate sodium salt
Ethanol, 2-[2-[2-(tridecyloxy)ethoxy]ethoxy]-, hydrogen sulfate, sodium salt	DTXSID2036457	Ethanol, 2-[2-[2-(tridecyloxy)ethoxy]ethoxy]-, hydrogen sulfate, sodium salt
Ethanol, 2-amino-, compds. with polyethylene glycol hydrogen sulfate C12-15-alkyl ethers	DTXSID10106981	Ethanol, 2-amino-, compds. with polyethylene glycol hydrogen sulfate C12-15-alkyl ethers
Ethoxylated alcohols, C10-16	DTXSID9050482	C10-16 ethoxylated alcohol
Ethoxylated alcohols, C6-12	DTXSID4041941	Alcohols, C6-12, ethoxylated
Ethoxylated propoxylated C10-16 alcohols	DTXSID9041946	Alcohols, C10-16, ethoxylated propoxylated
Ethylene oxide-propylene oxide copolymer 2-propylheptyl monoether	DTXSID50109512	Ethylene oxide-propylene oxide cooplymer mono(2-propylheptyl) ether
Fatty acids, C16-18 and C18-unsatd., esters with polyethylene glycol mono-Me ether	DTXSID00109507	Fatty acids, C16-18 and C18-unsatd., esters with polyethylene glycol mono-Me ether
Fatty acids, soya, esters with polyethylene glycol mono-Me ether	DTXSID40109485	Fatty acids, soya, esters with polyethylene glycol mono-Me ether
Glycerides, coco mono- and di-, ethoxylated	DTXSID70891962	PEG-30 Glyceryl cocoate
Kessco PEG 6000DS	DTXSID40890487	Polyoxyethylene distearate
Liponic EG 7	DTXSID40891353	Ethylene oxide polymer ether with glycerol
Magnesium polyoxyethylene (1-4) oleyl ether sulfate	DTXSID101021731	Magnesium oleth sulfate
Myristyl alcohol, ethoxylated	DTXSID40891171	Poly(oxy-1,2-ethanediyl), alpha-tetradecyl-omega-hydroxy-
N,N-Diethoxylated-N-coco-N-methylammonium chloride	DTXSID00891955	N,N-Diethoxylated-N-coco-N-methylammonium chloride
n-Dodecyl tetraethylene glycol ether	DTXSID3063752	Tetraethylene glycol monododecyl ether
Nikkol BL 1SY	DTXSID8044676	2-(Dodecyloxy)ethanol
NOCAS_1018299	DTXSID301018299	3,6,9,12,15,18,21,24,27,30,33,36,39,42,45,48,51,54,57-nonadecaoxanonapentacontane-1,59-diol
n-Octyl-polyoxyethylene	DTXSID80891170	n-Octyl-polyoxyethylene
Nonaethylene glycol monododecyl ether	DTXSID5039721	Polyoxyethylene (9) lauryl ether
Oxirane, 2-methyl-, polymer with oxirane, monobutyl ether	DTXSID301011205	Oxirane, 2-methyl-, polymer with oxirane, monobutyl ether
Oxirane, 2-methyl-, polymer with oxirane, monodecyl ether	DTXSID3052806	Oxirane, 2-methyl-, polymer with oxirane, monodecyl ether
PEG 600	DTXSID40218122	Dodecaethylene glycol
PEG tallow amine	DTXSID6051273	PEG-10 Hydrogenated tallow amine
PEG-23 Glyceryl laurate	DTXSID901021959	PEG-20 Glyceryl laurate
PEG-4	DTXSID9026922	Tetraethylene glycol
PEG-7 AMODIMETHICONE	DTXSID801042613	PEG-7 AMODIMETHICONE
Poly(oxy-<U+200B>1,<U+200B>2-<U+200B>ethanediyl)<U+200B>, a-<U+200B>methyl-<U+200B><U+03C9>-<U+200B>hydroxy- Polymer	DTXSID10872619	Methoxy polyethylene glycol 550
Poly(oxy-1,2-ethanediyl), .alpha.-docosyl-.omega.-hydroxy-	DTXSID90891166	Polyoxyethylene docosyl ether
Poly(oxy-1,2-ethanediyl), .alpha.-isohexadecyl-.omega.-hydroxy-	DTXSID601020483	Polyoxyethylene isohexadecyl ether
Poly(oxy-1,2-ethanediyl), .alpha.-sulfo-.omega.-hydroxy-, C16-18-alkyl ethers, sodium salts	DTXSID801012058	Poly(oxy-1,2-ethanediyl), .alpha.-sulfo-.omega.-hydroxy-, C16-18-alkyl ethers, sodium salts
POLY(OXY-1,2-ETHANEDIYL), a-SULFO-<U+03C9> -HYDROXY-, C10-16-ALKYL ETHERS, AMMONIUM SALTS	DTXSID5028320	Poly(oxy-1,2-ethanediyl), alpha-sulfo-omega-hydroxy-, C10-16-alkyl ethers, ammonium salts
Poly(oxy-1,2-ethanediyl), a-undecyl-<U+03C9>-hydroxy-, branched and linear	DTXSID5049605	Poly(oxy-1,2-ethanediyl), alpha-undecyl-omega-hydroxy-, branched and linear
Poly(oxy-1,2-ethanediyl),a-(dodecylphenyl)-w-hydroxy- - CAS 9014-92-0	DTXSID90895083	Polyethylene glycol monododecylphenyl ether
POLY(OXY-1,2-ETHANEDIYL)-SULFO-HYDROXY-, MONO-C12-14-ALKYLETHERS, SODIUM SALTS	DTXSID9028831	Poly(oxy-1,2-ethanediyl),alpha-sulfo-omega-hydroxy-, C12-14-alkyl ethers, sodium salts
Polyethylene glycol sorbitan laurate	NA	Sorbitan, dodecanoate, poly(oxy-1,2-ethanediyl) derivs.
Polyethylene glycol, dodecyl, tetradecyl, hexadecyl ether	DTXSID0041933	Alcohols, C12-16, ethoxylated
PPG-26-buteth-26	DTXSID501021783	PPG-26-buteth-26
Sodium 2-{2-[2-(tetradecyloxy)ethoxy]ethoxy}ethyl sulfate	DTXSID6067096	Ethanol, 2-[2-[2-(tetradecyloxy)ethoxy]ethoxy]-, hydrogen sulfate, sodium salt
Sodium coco monoglyceride sulfate	DTXSID2028066	Sodium coco monoglyceride sulfate
Sodium lauryl ether sulfate	DTXSID9049588	Ammonium (lauryloxypolyethoxy)ethyl sulfate
Sodium polyethylene glycol (1-4) oleyl ether sulfate	DTXSID90949954	Poly(oxy-1,2-ethanediyl), alpha-sulfo-omega-((9Z)-9-octadecenyloxy)-, sodium salt
Solangel 401	DTXSID70897323	Ethoxylated lanolin
steareth-10	DTXSID80927226	3,6,9,12,15,18,21,24,27,30-Decaoxaoctatetracontan-1-ol
Sulfuric acid, dimethyl ester, compd. with .alpha.,.alpha.',.alpha.'',.alpha.'''-[1,6-hexanediylbis(nitrilodi-2,1-ethanediyl)]tetrakis[.omega.-hydroxypoly(oxy-1,2-ethanediyl)]	DTXSID301013794	Sulfuric acid, dimethyl ester, compd. with .alpha.,.alpha.',.alpha.'',.alpha.'''-[1,6-hexanediylbis(nitrilodi-2,1-ethanediyl)]tetrakis[.omega.-hydroxypoly(oxy-1,2-ethanediyl)]
Synthalen L	DTXSID80904552	Carbomer 941
Trimethylolpropane poly(oxypropylene)triamine	DTXSID80895794	Trimethylolpropane poly(oxypropylene)triamine
UNII-2214Y721Q7	DTXSID601021900	Steardimonium hydroxypropyl panthenyl PEG-7 dimethicone phosphate chloride
9005-65-6	DTXSID0021175	Polysorbate 80
68439-50-9	DTXSID0041931	Alcohols, C12-14, ethoxylated
68439-49-6	DTXSID0041939	Ethoxylated C16-<U+200B>18 alcohols
9016-45-9	DTXSID1027718	Nonylphenoxypolyethoxyethanol
9002-92-0	DTXSID2025218	Polyoxyethylene dodecyl mono ether
81-5B	DTXSID2029298	alpha-Sulfo-omega-(dodecyloxy)poly(oxy-1,2-ethanediyl) sodium salt
9005-64-5	DTXSID3031949	Polysorbate 20
25322-68-3	DTXSID4027862	Polyethylene glycol
1,2-Ethanediol, polymer with 1,2-propanediol	DTXSID4047597	Poloxalene
68131-39-5	DTXSID5041932	Alcohols, C12-15, ethoxylated
9004-99-3	DTXSID6027715	Poly(oxy-1,2-ethanediyl), .alpha.-(1-oxooctadecyl)-.omega.-hydroxy-
9004-95-9	DTXSID60858847	Polyoxyethylene monohexadecyl ether
1-Octadecanol, monoether with polyethylene glycol	DTXSID7029299	Polyoxyethylene monooctadecyl ether
1-Tridecanol, monoether with polyethylene glycol	DTXSID8043993	Polyoxyethylene tridecyl ether
61788-85-0	DTXSID8044171	Ethoxylated hydrogenated castor oil

## Sheet: S2.5-NHANES Food TW Fractions
Code	Food	Tap Water Fraction	Notes
92101921	Frozen coffee drink, nonfat	0	NA
28345010	CHICKEN/TURKEY SOUP, CM OF, CAN, RED SOD, NS W/ MILK/WATER	0.25	Soups: assume "prepared with water" meand adding an equal amount of tap water. When "NS" on milk or water, assume water 50% of the time.
28345110	CHICKEN SOUP, CREAM OF, NS AS TO MILK OR WATER	0.25
28355110	CLAM CHOWDER, NEW ENG, NS AS TO MILK OR WATER ADDED	0.25
28355410	SHRIMP SOUP, CREAM OF, NS AS TO MILK/WATER ADDED	0.25
41601160	BEAN & HAM SOUP, CAN, REDUCED SODIUM, W/ WATER/RTS	0.25	See note on soups above. Assume ready-to-serve half the time.
41602070	SPLIT PEA SOUP, CAN, REDUCED SODIUM, W/ WATER/RTS	0.25
41602090	SPLIT PEA & HAM SOUP, CAN, REDUCED SODIUM, W/ WATER/RTS	0.25
58404040	CHICKEN RICE SOUP, CAN, RED SODIUM, PREP W/ WATER/RTS	0.25
71801000	POTATO SOUP, NS AS TO MADE W/MILK OR WATER	0.25
75601000	ASPARAGUS SOUP, CREAM OF, NS AS TO W/ MILK OR WATER	0.25
75603000	CELERY SOUP, CREAM OF, NS AS TO MILK OR WATER ADDED	0.25
75607060	MUSHROOM SOUP, CREAM OF, NS AS TO W/ MILK OR WATER	0.25
75607090	MUSHROOM SOUP, CREAM OF, CAN, RED. SOD., NS W/ MILK/WATER	0.25
75649010	VEGETABLE SOUP, PREP W/ WATER OR READY-TO-SERVE	0.25
75649030	VEGETABLE SOUP, CANNED, LOW SODIUM	0.25
75651010	VEGETABLE BEAN SOUP, PREPARED W/ WATER	0.25
75651050	VEGETABLE CHICKEN SOUP, W/ WATER OR READY-TO-SERVE	0.25
75651080	VEG BEEF SOUP W/RICE, PREP W/ WATER, READY-TO-SERVE	0.25
75651110	VEGETABLE CHICKEN RICE SOUP, CANNED, PREP W/WATER OR RTF	0.25
75651120	VEG CHICKEN NOODLE SOUP,PREP W/WATER,READY-TO-SERVE	0.25
75651150	VEGETABLE NOODLE SOUP, RED SODIUM, CAN, PREP W/ WATER/RTS	0.25
53105160	CAKE,CHOC,DEVIL'S FOOD/FUDGE, W/O ICING, HOMEMADE	0.35	Assume 'purchased ready-to-eat' half the time, otherwise 75% of fluid is from tap water
53105260	CAKE,CHOC,DEVIL'S FOOD/FUDGE,W/ICING, HOMEMADE	0.35
53120060	CAKE, WHITE, HOMEMADE, NS AS TO ICING	0.35
53120160	CAKE, WHITE, W/O ICING, HOMEMADE	0.35
53120260	CAKE, WHITE, W/ ICING, HOMEMADE	0.35
53121060	CAKE, YELLOW, HOMEMADE, NS AS TO ICING	0.35
53121160	CAKE, YELLOW, W/O ICING, HOMEMADE	0.35
53121260	CAKE, YELLOW, W/ ICING, HOMEMADE	0.35
53121300	CAKE, YELLOW, PUDDING MIX, W/O ICING	0.35
83105100	FRUIT DRESSING, MADE W/ HONEY, OIL, WATER	0.35
11710354	Infant formula, liquid concentrate, made with tap water (Similac Advance)	0.5	NA
11710374	Infant formula, liquid concentrate, made with tap water (Similac Sensitive)	0.5	NA
11710632	Infant formula, liquid concentrate, made with water, NFS (Enfamil Infant)	0.5	NA
11710633	Infant formula, liquid concentrate, made with tap water (Enfamil Infant)	0.5	NA
11710914	Infant formula, liquid concentrate, made with tap water (Gerber Good Start Gentle)	0.5	NA
11710964	Infant formula, liquid concentrate, made with tap water (Store Brand)	0.5	NA
11720314	Infant formula, liquid concentrate, made with tap water (Enfamil ProSobee)	0.5	NA
11720414	Infant formula, liquid concentrate, made with tap water (Similac Isomil Soy)	0.5	NA
11720614	Infant formula, liquid concentrate, made with tap water (Gerber Good Start Soy)	0.5	NA
27111050	SPAGHETTI SAUCE W/ BEEF/MEAT, HOMEMADE-STYLE	0.5
27130040	SPAGHETTI SAUCE W/ LAMB, HOMEMADE-STYLE	0.5
27141030	SPAGHETTI SAUCE W/ POULTRY, HOMEMADE	0.5
27162050	SPAGHETTI SAUCE W/ COMBINATION OF MEATS, HOMEMADE	0.5
27162060	SPAGHETTI SAUCE W/ MEAT & VEGETABLES, HOMEMADE-STYLE	0.5
28310160	BEEF BROTH, W/ TOMATO, HOME RECIPE	0.5
28311030	Menudo soup, canned, prepared with water or ready-to-serve	0.5
28321130	BACON SOUP, CREAM OF, PREPARED W/ WATER	0.5
28340600	Chicken or turkey vegetable soup, canned, prepared with water or ready-to-serve	0.5
28345030	CHICKEN/TURKEY SOUP, CM OF, CAN, RED SOD, W/ WATER	0.5
28345130	CHICKEN SOUP, CREAM OF, PREPARED W/ WATER	0.5
28355130	CLAM CHOWDER, NEW ENGLAND, W/ WATER	0.5
28355430	SHRIMP SOUP, CREAM OF, W/ WATER	0.5
32120100	EGG DESSERT, CUSTARD-LIKE, W/ WATER & SUGAR, P.R.	0.5	Looked up recipe
41430200	MEAL REPLACE / SUPP, SOY-MILK-BASE,POWD,WATER ADDED	0.5
58401010	BARLEY SOUP, HOME RECIPE, CANNED, OR READY-TO-SERVE	0.5
71801020	POTATO SOUP, PREPARED W/ WATER	0.5
72302020	Broccoli soup, prepared with water, home recipe, canned, or ready-to-serve	0.5
74404020	SPAGHETTI SAUCE W/ VEGETABLES, HOMEMADE-STYLE	0.5
74602010	TOMATO SOUP, PREPARED W/ WATER	0.5
74602200	TOMATO SOUP, CANNED, REDUCED SODIUM, PREP W/ WATER	0.5
74603010	TOMATO BEEF SOUP, PREPARED W/ WATER	0.5
74604010	TOMATO BEEF NOODLE SOUP, PREPARED W/ WATER	0.5
74604100	TOMATO BEEF RICE SOUP, PREPARED W/ WATER	0.5
74604500	TOMATO NOODLE SOUP, PREPARED W/ WATER	0.5
74605010	TOMATO RICE SOUP, PREPARED W/ WATER	0.5
74606010	TOMATO VEGETABLE SOUP, PREP W/ WATER	0.5
74606020	TOMATO VEGETABLE SOUP W/NOODLES, PREPARED W/ WATER	0.5
75601020	ASPARAGUS SOUP, CREAM OF, PREPARED W/ WATER	0.5
75603020	CELERY SOUP, CREAM OF, PREPARED W/ WATER	0.5
75604020	CORN SOUP, CREAM OF, PREPARED W/ WATER	0.5
75607020	MUSHROOM SOUP, CREAM OF, PREPARED W/ WATER	0.5
75607040	MUSHROOM SOUP, W/ MEAT BROTH, PREPARED W/ WATER	0.5
75607050	MUSHROOM SOUP, CM OF, LOW SOD, PREP W/ WATER	0.5
75607140	MUSHROOM SOUP, CM OF, CAN, RED SOD, PREP W/ WATER	0.5
75609050	PEA SOUP, CAN, LOW SOD, PREP W/ WATER	0.5
75651020	VEGETABLE BEEF SOUP, PREPARED W/ WATER	0.5
75651030	VEGETABLE BEEF NOODLE SOUP, PREPARED W/ WATER	0.5
75651040	VEGETABLE NOODLE SOUP, PREPARED W/ WATER	0.5
75651070	VEGETABLE RICE SOUP, PREPARED W/ WATER	0.5
75651090	VEGETABLE CHICKEN SOUP, CAN, LOW SOD, PREP W/ WATER	0.5
75652010	VEGETABLE BEEF SOUP, HOME RECIPE	0.5
75652040	VEG BEEF SOUP W/ NOODLES, HOME RECIPE	0.5
75652050	VEG BEEF SOUP W/ RICE, HOME RECIPE	0.5
75654010	VEGETARIAN VEGETABLE SOUP, PREPARED W/ WATER	0.5
75657000	VEGETABLE BROTH, BOUILLON (INCL POT LIQUOR)	0.5	Assume 50% from dried bouillon w/ tap water
83208000	VINEGAR, SUGAR & WATER DRESSING	0.5
93301181	Whiskey and water	0.5
93301217	Vodka and water	0.5
28311020	Menudo soup, home recipe	0.75	NA
28340130	CHICKEN BROTH, W/ TOMATO, HOME RECIPE	0.75
28340660	CHICKEN OR TURKEY VEGETABLE SOUP, HOME RECIPE	0.75
28500070	GRAVY, BEEF OR MEAT, HOME RECIPE	0.75
28500080	GRAVY, POULTRY, HOME RECIPE	0.75
51182020	BREAD STUFFING W/ EGG	0.75
53105000	CAKE,CHOC,DEVIL'S FOOD/FUDGE,STNDRD MIX,NS ICING	0.75	assume eggs add 1/4 total water
53105050	CAKE, CHOC, DEVIL'S FOOD/FUDGE, HOMEMADE, NS ICING	0.75
53105100	CAKE,CHOC,DEVILS FOOD/FUDGE,STNDRD MIX, W/O ICING	0.75
53105200	CAKE,CHOC,DEVIL'S FOOD/FUDGE,STNDRD MIX,W/ICING	0.75
53105600	CAKE,CHOC/DVL FD, PUDD MIX, LITE RECIPE, W/ ICING	0.75
53105650	CAKE,CHOC,DEVIL FOOD/FUDGE,PUD TYPE.NO CHOL,NS ICIN	0.75
53105700	CAKE,CHOC,DEVIL FOOD/FUDGE,PUD TYPE,NO CHOL,NO ICIN	0.75
53105750	CAKE,CHOC,DEVIL FOOD/FUDGE,PUD TYPE,NO CHOL,LITE IC	0.75
53105900	CAKE, CHOC,DEVIL'S FOOD/FUDGE,PUDDING MIX, NS ICING	0.75
53106000	CAKE,CHOC,DEVIL'S FOOD/FUDGE,PUDDING MIX, W/O ICING	0.75
53106050	CAKE, CHOC,DEVIL'S FOOD/FUDGE, PUDDING MIX, W/ICING	0.75
53120000	CAKE, WHITE, STANDARD MIX, NS AS TO ICING	0.75
53120100	CAKE, WHITE, STANDARD MIX, W/O ICING	0.75
53120200	CAKE, WHITE, STANDARD MIX, W/ ICING	0.75
53120300	CAKE, WHITE, PUDDING-TYPE MIX, NS AS TO ICING	0.75
53120330	CAKE, WHITE, PUDDING-TYPE MIX, W/O ICING	0.75
53120350	CAKE, WHITE, PUDDING-TYPE MIX, W/ ICING	0.75
53121000	CAKE, YELLOW, STANDARD MIX, NS AS TO ICING	0.75
53121100	CAKE, YELLOW, STANDARD MIX, W/O ICING	0.75
53121200	CAKE, YELLOW, STANDARD MIX, W/ ICING	0.75
53121280	CAKE, YELLOW, PUDDING MIX, NS AS TO ICING	0.75
53121330	CAKE, YELLOW, PUDDING MIX, W/ ICING	0.75
61201620	GRAPEFRUIT JUICE, FROZEN (RECONSTITUTED WITH WATER)	0.75	Juice from concentrate: assume 3 cans water to 1 can concentrate
61210620	ORANGE JUICE, FROZEN (RECONSTITUTED WITH WATER)	0.75
61210820	ORANGE JUICE,FROZ, W/,CALCIUM ADDED,RECON W/WATER	0.75
61213620	TANGERINE JUICE, FROZEN (RECONSTITUTED)	0.75
75609020	PEA SOUP, PREPARED W/ WATER	0.75	Could be from dried peas
75649110	VEGETABLE SOUP, HOME RECIPE	0.75
75649150	VEGETABLE NOODLE SOUP, HOME RECIPE	0.75
75651000	MINESTRONE SOUP, HOME RECIPE	0.75
92512050	FROZEN DAIQUIRI MIX, FROM FROZ CONC, RECONSTITUTED	0.75
92101810	Coffee, macchiato	0.8	NA
92101820	Coffee, macchiato, sweetened	0.8	NA
92101850	Coffee, cafe con leche	0.8	NA
92101851	Coffee, cafe con leche, decaffeinated	0.8	NA
92101900	COFFEE, LATTE	0.8
92101901	Coffee, Latte, nonfat	0.8	NA
92101903	Coffee, Latte, with non-dairy milk	0.8	NA
92101904	Coffee, Latte, flavored	0.8	NA
92101905	Coffee, Latte, nonfat, flavored	0.8	NA
92101906	Coffee, Latte, with non-dairy milk, flavored	0.8	NA
92101910	COFFEE, LATTE, DECAF	0.8
92101911	Coffee, Latte, decaffeinated, nonfat	0.8	NA
92101913	Coffee, Latte, decaffeinated, with non-dairy milk	0.8	NA
92101917	Coffee, Latte, decaffeinated, flavored	0.8	NA
92101918	Coffee, Latte, decaffeinated, nonfat, flavored	0.8	NA
92101919	Coffee, Latte, decaffeinated, with non-dairy milk, flavored	0.8	NA
92101920	BLENDED COFFEE BEVERAGE, REGULAR, SWEETENED	0.8
92101923	Frozen coffee drink, with non-dairy milk	0.8	NA
92101925	Frozen coffee drink, with whipped cream	0.8	NA
92101926	Frozen coffee drink, nonfat, with whipped cream	0.8	NA
92101928	Frozen coffee drink, with non-dairy milk and whipped cream	0.8	NA
92101930	BLENDED COFFEE BEVERAGE, DECAF, SWEETENED	0.8
92101933	Frozen coffee drink, decaffeinated, with non-dairy milk	0.8	NA
92101935	Frozen coffee drink, decaffeinated, with whipped cream	0.8	NA
92101936	Frozen coffee drink, decaffeinated, nonfat, with whipped cream	0.8	NA
92101938	Frozen coffee drink, decaffeinated, with non-dairy milk and whipped cream	0.8	NA
92101950	COFFEE, MOCHA	0.8
92101955	Coffee, Cafe Mocha, nonfat	0.8	NA
92101960	COFFEE, MOCHA, MADE W/ SOY MILK	0.8
92101965	Coffee, Cafe Mocha, decaffeinated	0.8	NA
92101970	Coffee, Cafe Mocha, decaffeinated, nonfat	0.8	NA
92101975	Coffee, Cafe Mocha, decaffeinated, with non-dairy milk	0.8	NA
92102000	Frozen mocha coffee drink	0.8	NA
92102010	Frozen mocha coffee drink, nonfat	0.8	NA
92102020	Frozen mocha coffee drink, with non-dairy milk	0.8	NA
92102030	Frozen mocha coffee drink, with whipped cream	0.8	NA
92102040	Frozen mocha coffee drink, nonfat, with whipped cream	0.8	NA
92102050	Frozen mocha coffee drink, with non-dairy milk and whipped cream	0.8	NA
92102060	Frozen mocha coffee drink, decaffeinated	0.8	NA
92102070	Frozen mocha coffee drink, decaffeinated, nonfat	0.8	NA
92102080	Frozen mocha coffee drink, decaffeinated, with non-dairy milk	0.8	NA
92102090	Frozen mocha coffee drink, decaffeinated, with whipped cream	0.8	NA
92102100	Frozen mocha coffee drink, decaffeinated, nonfat, with whipped cream	0.8	NA
92102110	Frozen mocha coffee drink, decaffeinated, with non-dairy milk and whipped cream	0.8	NA
92102500	Coffee, Iced Latte	0.8	NA
92102501	Coffee, Iced Latte, nonfat	0.8	NA
92102502	Coffee, Iced Latte, with non-dairy milk	0.8	NA
92102503	Coffee, Iced Latte, flavored	0.8	NA
92102504	Coffee, Iced Latte, nonfat, flavored	0.8	NA
92102505	Coffee, Iced Latte, with non-dairy milk, flavored	0.8	NA
92102510	Coffee, Iced Latte, decaffeinated	0.8	NA
92102511	Coffee, Iced Latte, decaffeinated, nonfat	0.8	NA
92102512	Coffee, Iced Latte, decaffeinated, with non-dairy milk	0.8	NA
92102513	Coffee, Iced Latte, decaffeinated, flavored	0.8	NA
92102514	Coffee, Iced Latte, decaffeinated, nonfat, flavored	0.8	NA
92102515	Coffee, Iced Latte, decaffeinated, with non-dairy milk, flavored	0.8	NA
92102600	Coffee, Iced Cafe Mocha	0.8	NA
92102601	Coffee, Iced Cafe Mocha, nonfat	0.8	NA
92102602	Coffee, Iced Cafe Mocha, with non-dairy milk	0.8	NA
92102610	Coffee, Iced Cafe Mocha, decaffeinated	0.8	NA
92102611	Coffee, Iced Cafe Mocha, decaffeinated, nonfat	0.8	NA
92102612	Coffee, Iced Cafe Mocha, decaffeinated, with non-dairy milk	0.8	NA
92161001	Coffee, Cappuccino, nonfat	0.8	NA
92161002	Coffee, Cappuccino, with non-dairy milk	0.8	NA
92162000	CAPPUCCINO, DECAFFEINATED	0.8
92162001	Coffee, Cappuccino, decaffeinated, nonfat	0.8	NA
92162002	Coffee, Cappuccino, decaffeinated, with non-dairy milk	0.8	NA
92306800	Tea, hot, chai, with milk	0.8	NA
28340590	CHICKEN CORN SOUP WITH NOODLES, HOME RECIPE	0.9
28350040	FISH STOCK, HOME RECIPE	0.9
58402100	BEEF NOODLE SOUP, HOME RECIPE	0.9
58403040	CHICKEN NOODLE SOUP, HOME RECIPE	0.9
58404030	CHICKEN OR TURKEY RICE SOUP, HOME RECIPE	0.9
58406020	TURKEY NOODLE SOUP, HOME RECIPE	0.9
28310170	BEEF BROTH, W/O TOMATO, HOME RECIPE	0.95
28340120	CHICKEN BROTH, W/O TOMATO, HOME RECIPE	0.95
41601140	BEAN SOUP, HOME RECIPE	0.95	Assume some fluid from veggies
41601180	BEAN & HAM SOUP, HOME RECIPE	0.95
11120000	MILK, DRY, RECONSTITUTED, NFS	1
11121100	MILK, DRY, RECONSTITUTED, WHOLE	1
11121210	MILK, DRY, RECONSTITUTED, LOWFAT	1
11121300	MILK, DRY, RECONSTITUTED, NONFAT	1
11122000	BUTTERMILK, DRY, RECONSTITUTED	1
11514100	COCOA, SUGAR, & DRY MILK MIXTURE, WATER ADDED	1
11514300	COCOA W/ NF DRY MILK, LO CAL SWEETENER, WATER ADDED	1
11514310	Hot chocolate / Cocoa, made with no sugar added dry mix and water	1	NA
11514500	COCOA W/ WHEY, LO CAL SWEETNR, FORTIFD, WATER ADDED	1
11515400	COCOA W/ NFDM, LOW CALORIE, HI CALCIUM, WATER ADDED	1
11518000	MILK BEV W/ NF DRY MLK, LO CAL SWEET, WATER, CHOC	1
11518050	MILK BEV W/NF DRY MILK, LO CAL SWEET,WATER,NOT CHOC	1
11518100	MILK BEV W/NFD MILK, LO CAL SWEET, HI CALCIUM, CHOC	1
11631000	HIGH CALORIE BEV, CANNED OR POWDERED, RECONSTITUTED	1
11710054	Infant formula, powder, made with tap water (Similac Expert Care Alimentum)	1	NA
11710357	Infant formula, powder, made with tap water (Similac Advance)	1	NA
11710363	Infant formula, powder, made with water, NFS (Similac Advance Organic)	1	NA
11710367	Infant formula, powder, made with tap water (Similac Advance Organic)	1	NA
11710377	Infant formula, powder, made with tap water (Similac Sensitive)	1	NA
11710383	Infant formula, powder, made with water, NFS (Similac for Spit-Up)	1	NA
11710387	Similac Sensitive for Spit-Up, infant formula, prepared from powder, made with tap water	1	NA
11710477	Infant formula, powder, made with tap water (Similac Expert Care NeoSure)	1	NA
11710481	Infant formula, powder, made with water, NFS (Similac Go and Grow)	1	NA
11710482	Similac Go and Grow, infant formula, prepared from powder, made with tap water	1	NA
11710626	Infant formula, powder, made with water, NFS (Enfamil Newborn)	1	NA
11710627	Infant formula, powder, made with tap water (Enfamil Newborn)	1	NA
11710636	Infant formula, powder, made with water, NFS (Enfamil Infant)	1	NA
11710637	Infant formula, powder, made with tap water (Enfamil Infant)	1	NA
11710643	Enfamil PREMIUM LIPIL, infant formula, prepared from powder, made with water, NFS	1	NA
11710644	Enfamil PREMIUM LIPIL, infant formula, prepared from liquid concentrate, made with tap water	0.5	NA
11710647	Enfamil PREMIUM LIPIL, infant formula, prepared from powder, made with tap water	1	NA
11710654	Enfamil LIPIL, infant formula, prepared from liquid concentrate, made with tap water	0.5	NA
11710657	Enfamil LIPIL, infant formula, prepared from powder, made with tap water	1	NA
11710664	Infant formula, powder, made with tap water (Enfamil A.R.)	1	NA
11710674	Infant formula, powder, made with tap water (Enfamil EnfaCare)	1	NA
11710677	Infant formula, powder, made with tap water (Enfamil Gentlease)	1	NA
11710687	Infant formula, powder, made with tap water (Enfamil Enfagrow Toddler Transitions)	1	NA
11710693	Infant formula, powder, made with water, NFS (Enfamil Enfagrow Toddler Transitions Gentlease)	1	NA
11710697	Infant formula, powder, made with tap water (Enfamil Enfagrow Toddler Transitions Gentlease)	1	NA
11710917	Infant formula, powder, made with tap water (Gerber Good Start Gentle)	1	NA
11710923	Infant formula, powder, made with water, NFS (Gerber Good Start Protect)	1	NA
11710927	Infant formula, powder, made with tap water (Gerber Good Start Protect)	1	NA
11710933	Gerber Good Start 2 Gentle Plus, infant formula, prepared from powder, made with water, NFS	1	NA
11710937	Gerber Good Start 2 Gentle Plus, infant formula, prepared from powder, made with tap water	1	NA
11710943	Gerber Good Start 2 Protect Plus, infant formula, prepared from powder, made with water, NFS	1	NA
11710947	Gerber Good Start 2 Protect Plus, infant formula, prepared from powder, made with tap water	1	NA
11710967	Infant formula, powder, made with tap water (Store Brand)	1	NA
11720317	Infant formula, powder, made with tap water (Enfamil ProSobee)	1	NA
11720323	Infant formula, powder, made with water, NFS (Enfamil Enfagrow Toddler Transitions Soy)	1	NA
11720327	Enfamil Enfagrow Soy Next Step LIPIL, infant formula, prepared from powder, made with tap water	1	NA
11720417	Infant formula, powder, made with tap water (Similac Isomil Soy)	1	NA
11720443	Similac Go and Grow Soy, infant formula, prepared from powder, made with water, NFS	1	NA
11720447	Similac Go and Grow Soy, infant formula, prepared from powder, made with tap water	1	NA
11720617	Infant formula, powder, made with tap water (Gerber Good Start Soy)	1	NA
11720623	Gerber Good Start 2 Soy Plus, infant formula, prepared from powder, made with water, NFS	1	NA
11720627	Gerber Good Start 2 Soy Plus, infant formula, prepared from powder, made with tap water	1	NA
11720804	America's Store Brand Soy, infant formula, prepared from liquid concentrate, made with tap water	0.5	NA
11720807	Infant formula, powder, made with tap water (Store Brand Soy)	1	NA
11740314	Enfamil Nutramigen LIPIL, infant formula, prepared from liquid concentrate, made with tap water	0.5	NA
11740317	Enfamil Nutramigen LIPIL, infant formula, prepared from powder, made with tap water	1	NA
11740323	Infant formula, powder, made with water, NFS (PurAmino)	1	NA
11740327	Enfamil Nutramigen AA LIPIL, infant formula, prepared from powder, made with tap water	1	NA
11740407	Enfmail Pregestimil LIPIL, infant formula, prepared from powder, made with tap water	1	NA
13250200	MOUSSE,CHOCOLATE,LOW FAT,REDUCED CAL,DRY MIX	1
26109180	COD, DRIED, SALTED, SALT REMOVED IN WATER	1
51000180	BREAD, HOMEMADE/PURCH AT A BAKERY, NS AS TO FLOUR	1	Probably not much water;
51000190	BREAD, HOMEMADE/PURCH AT A BAKERY, TOASTD,NS FLOUR	1	assume bakery used tap too.
51000250	ROLL, HOMEMADE/PURCH AT A BAKERY, NS AS TO FLOUR	1
51000260	ROLL, HOMEMADE/PURCH AT A BAKERY, TOASTD,NS FLOUR	1
51101050	BREAD, WHITE, HOMEMADE OR PURCHASED AT A BAKERY	1
51101060	BREAD, WHITE, HOMEMADE OR PURCH AT A BAKERY TOASTED	1
51106010	BREAD, NATIVE, WATER, P.R. (PAN CRIOLLO)	1
51106020	BREAD, NATIVE, WATER, P.R., TOASTED (PAN CRIOLLO)	1
51151060	ROLL, WHITE, SOFT, HOMEMADE/PURCH AT A BAKERY	1
51165060	COFFEE CAKE, YEAST, HOMEMADE/PURCH AT A BAKERY	1
51182010	BREAD, STUFFING (INCLUDE HOMEMADE; STUFFING, NFS)	1
51201060	BREAD, 100% WHOLE WHEAT, HOME-MADE	1
51201070	BREAD, 100% WHOLE WHEAT, HOME-MADE, TOASTED	1
51220030	ROLL, 100% WHOLE WHEAT, HOME RECIPE/BAKERY	1
51220040	ROLL, 100% WHOLE WHEAT, HOME RECIPE/BAKERY, TOASTED	1
51300140	BREAD, WHOLE WHEAT, NS AS TO 100%, MADE FROM HOME RECIPE OR	1
51300150	BREAD, WHOLE WHEAT, NS 100%, HOME RECIPE/BAKERY, TOASTED	1
51301040	BREAD, CRACKED WHEAT, HOME RECIPE/BAKERY	1
51301050	BREAD, CRACKED WHEAT, HOME RECIPE/BAKERY, TOASTED	1
51301540	BREAD, FRENCH, WHOLE WHEAT, NS 100%, HOMEMADE/BAKERY	1
51301550	BREAD, FRENCH, WHOLE WHEAT, NS 100%, HOMEMADE, TOASTED	1
51320040	ROLL, CRACKED WHEAT, HOME RECIPE/BAKERY	1
51320050	ROLL, CRACKED WHEAT, HOME RECIPE/BAKERY, TOASTED	1
51320530	ROLL, WHOLE WHEAT, NS 100%, MADE FROM HOMEMADE/BAKERY	1
51320540	ROLL, WHOLE WHEAT, NS AS TO 100%, HOMEMADE/BAKERY, TOASTED	1
52101100	BISCUIT, BAKING POWDER OR BUTTERMILK, FROM MIX	1
52104010	BISCUIT, BAKING POWDER OR BUTTERMILK, HOMEMADE	1
52202060	CORNBREAD, HOMEMADE	1
52206060	CORNBREAD MUFFIN, STICK, ROUND, HOMEMADE	1
53206020	COOKIE, CHOC CHIP, HOMEMADE OR PURCHASED AT BAKERY	1
53452500	PASTRY, MAINLY FLOUR & WATER, FRIED	1
55501000	FLOUR & WATER PATTY (INCLUDE CHINESE PANCAKE)	1
55502000	FLOUR AND WATER GRAVY	1
56201050	Grits, regular or quick, made with water, NS as to fat	1	NA
56201051	Grits, regular or quick, made with water, no added fat	1	NA
56201052	Grits, regular or quick, made with water, fat added	1	NA
56201510	CORNMEAL MUSH, MADE W/ WATER	1
56203055	Oatmeal, regular or quick, made with water, NS as to fat	1	NA
56203056	Oatmeal, regular or quick, made with water, no added fat	1	NA
56203057	Oatmeal, regular or quick, made with water, fat added	1	NA
56203085	Oatmeal, instant, plain, made with water, NS as to fat	1	NA
56203086	Oatmeal, instant, plain, made with water, no added fat	1	NA
56203087	Oatmeal, instant, plain, made with water, fat added	1	NA
56207015	Cream of wheat, regular or quick, made with water, NS as to fat	1	NA
56207016	Cream of wheat, regular or quick, made with water, no added fat	1	NA
56207017	Cream of wheat, regular or quick, made with water, fat added	1	NA
58148600	PASTA TETRAZZINI,DRY MIX,PREPARED W/ WATER	1
71501200	WHITE POTATO, COMPLETE DRY MIX, MASHED, MADE W/ WATER	1
71801040	POTATO SOUP, INSTANT, MADE FROM DRY MIX	1
74602050	TOMATO SOUP, INSTANT TYPE, PREPARED W/ WATER	1	Assume that's powder
75607130	MUSHROOM SOUP, MADE FROM DRY MIX	1
75608200	ONION SOUP, MADE FROM DRY MIX	1
75649050	VEGETABLE SOUP, MADE FROM DRY MIX	1
75649070	VEGETABLE SOUP, FROM DRY MIX, LOW SODIUM	1
75649100	VEG SOUP,CREAM OF,MADE FROM DRY,LOW SODIUM,W/WATER	1
91301100	SUGAR (WHITE) & WATER SYRUP (INCLUDE SIMPLE SYRUP)	1
91301200	SUGAR (BROWN) & WATER SYRUP	1
92100000	COFFEE, NS AS TO TYPE	1
92100500	COFFEE, REGULAR, NS GROUND/INSTANT	1
92101000	COFFEE, MADE FROM GROUND, REGULAR	1
92101500	COFFEE, BREWED, EQUAL PARTS REG & DECAFFEINATED	1
92101600	COFFEE, TURKISH	1
92101610	COFFEE, ESPRESSO	1
92101630	COFFEE, ESPRESSO, DECAFFEINATED	1
92101640	COFFEE, MEXICAN, REG, UNSWEETENED (NO MILK)	1
92101650	COFFEE, MEXICAN, REG, SWEETENED (NO MILK)	1
92101660	COFFEE, MEXICAN, DECAF, UNSWEETENED (NO MILK)	1
92101670	COFFEE, MEXICAN, DECAF, SWEETENED (NO MILK)	1
92101700	COFFEE, MADE FROM GROUND, REGULAR, FLAVORED	1
92101800	COFFEE, CUBAN (INCL SWEETENED EXPRESSO)	1
92101931	Frozen coffee drink, decaffeinated, nonfat	1	NA
92102400	Iced Coffee, brewed	1	NA
92102401	Iced Coffee, brewed, decaffeinated	1	NA
92102450	Iced Coffee, pre-lightened and pre-sweetened	1	NA
92103000	COFFEE, MADE FROM POWDERED INSTANT, REGULAR	1
92104000	COFFEE, FROM POWDER, 50% LESS CAFFEINE	1
92105010	COFFEE, MADE FROM LIQUID CONCENTRATE	1
92106000	COFFEE, ACID NEUTRALIZED, FROM POWDERED INSTANT	1
92111000	COFFEE, DECAFFEINATED, NS AS TO GROUND OR INSTANT	1
92111010	COFFEE, DECAFFEINATED, MADE FROM GROUND	1
92114000	COFFEE, DECAFFEINATED, MADE FROM POWDERED INSTANT	1
92121000	COFFEE, FROM POWDERED MIX,W/WHITENER&SUGAR, INSTANT	1
92121001	Coffee, instant, decaffeinated, pre-lightened and pre-sweetened with sugar, reconsitituted	1	NA
92121010	COFFEE, FROM POWDER, PRESWEETENED, NO WHITENER	1
92121020	COFFEE & COCOA (MOCHA), W/ WHITENER, PRESWEETENED	1
92121030	COFFEE & COCOA, FROM MIX, W/WHITENER, LOW CAL SWEET	1
92121040	COFFEE, FROM POWDER, W/ WHITENER & LO CAL SWEETENER	1
92121041	Coffee, instant, decaffeinated, pre-lightened and pre-sweetened with low calorie sweetener, reconstituted	1	NA
92121050	COFFEE&COCOA,FROM PWDR,W/WHITE&LOW CAL SWEET,DECAF	1
92130000	COFFEE, REG, PRESWEETENED W/SUGAR, PRE-LIGHTENED	1
92130001	COFFEE, DECAFFEINATED, PRESWEETENED W/ SUGAR, PRE-LIGHTENED	1
92130005	COFFEE, REGULAR, WITH LOW CALORIE SWEETENER, PRE-LIGHTENED	1
92130006	COFFEE, DECAFFEINATED,W/ LOW CALORIE SWEETENER,PRE-LIGHTENED	1
92130010	COFFEE, PRE-LIGHTENED, NO SUGAR	1
92130011	Coffee, decaffeinated, pre-lightened	1	NA
92130020	COFFEE, PRESWEETENED W/ SUGAR	1
92130021	Coffee, decaffeinated, pre-sweetened with sugar	1	NA
92130030	Coffee, pre-sweetened with low calorie sweetener	1	NA
92130031	Coffee, decaffeinated, pre-sweetened with low calorie sweetener	1	NA
92150000	COFFEE & CHICORY, NS AS TO GROUND OR INSTANT	1
92151000	COFFEE & CHICORY, MADE FROM POWDERED INSTANT	1
92151100	COFFEE, DECAFFEINATED, AND CHICORY, FROM INSTANT	1
92152000	COFFEE & CHICORY, MADE FROM GROUND	1
92152010	Coffee and chicory, brewed, decaffeinated	1	NA
92153000	COFFEE, REGULAR, W/ CEREAL (INCLUDE W/ BARLEY)	1
92153100	COFFEE, DECAFFEINATED, W/ CEREAL (INCLUDE W/BARLEY)	1
92161000	CAPPUCCINO	1
92191000	COFFEE, DRY POWDER, NS AS TO REG OR DECAF	1
92191100	COFFEE, DRY POWDER, REGULAR	1
92191200	COFFEE, DRY POWDER, DECAFFEINATED	1
92191250	COFFEE, DRY, ACID NEUTRALIZED (INCLUDE KAVA)	1
92191500	COFFEE & CHICORY, DRY POWDER	1
92191520	COFFEE, DECAFFEINATED, AND CHICORY, DRY POWDER	1
92192000	COFFEE & COCOA (MOCHA) MIX,W/WHITENER,PRESWEET, DRY	1
92192030	COFFEE & COCOA (MOCHA) MIX,W/WHITENER, LOW CAL, DRY	1
92192040	COFFEE&COCOA MIX,DRY,W/WHITENER&LOW CAL SWEET,DECAF	1
92193000	COFFEE, DRY MIX, W/ WHITENER & SUGAR	1
92193020	COFFEE, DRY MIX, W/ WHITENER & LOW CAL SWEETENER	1
92201010	POSTUM (COFFEE SUBSTITUTE)	1
92202010	CHICORY (COFFEE SUBSTITUTE)	1
92203000	CEREAL, BEVERAGE (INCLUDE PERO, BREAK AWAY)	1
92203110	CEREAL BEVERAGE, W/BEET ROOTS,FROM POWDERED INSTANT	1
92204000	MATE, SWEETENED BEVERAGE FROM DRIED GREEN LEAVES	1
92205000	RICE BEVERAGE (INCL RICE TEA)	1
92291300	POSTUM, DRY POWDER	1
92301000	TEA, NS AS TO TYPE, UNSWEETENED	1
92301060	TEA, NS AS TO TYPE, PRESWEETENED W/ SUGAR	1
92301080	TEA, PRESWEETENED W/ LOW CALORIE SWEETENER	1
92301100	TEA, NS AS TO TYPE, DECAFFEINATED, UNSWEETENED	1
92301130	TEA, NS AS TO TYPE, PRESWEETENED, NS AS TO SWEETNER	1
92301160	TEA, DECAFFEINATED, W/ SUGAR, NFS	1
92301180	TEA, DECAFFEINATED, LOW CALORIE SWEETENER, NFS	1
92301190	TEA, PRESWEETENED, NS SWEETENER, DECAFFEINATED	1
92302000	TEA, LEAF, UNSWEETENED	1
92302200	TEA, LEAF, PRESWEETENED W/ SUGAR	1
92302300	TEA, LEAF, PRESWEETENED W/ LOW CALORIE SWEETENER	1
92302400	TEA, LEAF, PRESWEETENED, NS AS TO SWEETENER	1
92302500	TEA, DECAFFEINATED, UNSWEETENED	1
92302600	TEA, LEAF, DECAFFEINATED, PRESWEETENED W/ SUGAR	1
92302700	TEA, LEAF, DECAFFEINATED, LOW CALORIE SWEETENER	1
92302800	TEA, LEAF, DECAFFEINATED, PRESWEETENED, NFS	1
92303010	Tea, hot, leaf, green	1	NA
92303100	Tea, hot, leaf, green, decaffeinated	1	NA
92304000	TEA, MADE FROM FROZEN CONCENTRATE, UNSWEETENED	1
92304100	Tea, hot, leaf, oolong	1	NA
92304700	TEA, FROM FROZ CONC, DECAF, PRESWEETND, LOW CALORIE	1
92305000	TEA, MADE FROM POWDERED INSTANT, PRESWEETENED	1
92305010	TEA, MADE FROM POWDERED INSTANT, UNSWEETENED	1
92305040	TEA, MADE FROM POWDERED INSTANT,PRESWEETEND W/SUGAR	1
92305050	TEA, FROM POWDER, DECAFFEINATED, PRESWEET W/ SUGAR	1
92305090	TEA, MADE FROM POWDERED INSTANT,W/LO CAL SWEETENER	1
92305110	TEA, FROM INSTANT, DECAF, PRESWEETENED, LOW CALORIE	1
92305180	TEA ,MADE FROM POWDERED INSTANT, DECAF ,UNSWEET	1
92305800	TEA, FROM POWDER, DECAFFEINATED, PRESWEETENED	1
92305900	Tea, iced, instant, green, unsweetened	1	NA
92305910	Tea, iced, instant, green, pre-sweetened with sugar	1	NA
92305920	Tea, iced, instant, green, pre-sweetened with low calorie sweetener	1	NA
92306000	TEA, HERBAL (INCLUDE SASSAFRAS,LICORICE)	1
92306020	TEA, HERBAL, PRESWEETENED W/ SUGAR	1
92306030	TEA, HERBAL, PRESWEETENED W/ LOW CAL SWEETENER	1
92306040	TEA, HERBAL, PRESWEETENED, NS AS TO SWEETENER	1
92306050	TEA, MADE FROM CARAWAY SEEDS	1
92306090	TEA, HIBISCUS	1
92306100	CORN BEVERAGE(INCLUDE CORN TEA)	1
92306200	BEAN BEVERAGE (INCLUDE BEAN TEA)	1
92306610	TEA, RUSSIAN	1
92306700	TEA, CHAMOMILE	1
92307000	TEA, POWDERED INSTANT, UNSWEETENED, DRY	1
92307400	TEA, POWDERED INSTANT, SWEETENED, NS SWEETENER, DRY	1
92308000	Tea, iced, brewed, black, pre-sweetened with sugar	1	NA
92308010	Tea, iced, brewed, black, pre-sweetened with low calorie sweetener	1	NA
92308020	Tea, iced, brewed, black, unsweetened	1	NA
92308030	Tea, iced, brewed, black, decaffeinated, pre-sweetened with sugar	1	NA
92308040	Tea, iced, brewed, black, decaffeinated, pre-sweetened with low calorie sweetener	1	NA
92308050	Tea, iced, brewed, black, decaffeinated, unsweetened	1	NA
92308500	Tea, iced, brewed, green, pre-sweetened with sugar	1	NA
92308510	Tea, iced, brewed, green, pre-sweetened with low calorie sweetener	1	NA
92308520	Tea, iced, brewed, green, unsweetened	1	NA
92308530	Tea, iced, brewed, green, decaffeinated, pre-sweetened with sugar	1	NA
92308540	Tea, iced, brewed, green, decaffeinated, pre-sweetened with low calorie sweetener	1	NA
92308550	Tea, iced, brewed, green, decaffeinated, unsweetened	1	NA
92541010	FRUIT FLAVORED DRINK, MADE FROM POWDERED MIX	1
92542000	FRUIT FLAVORED DRINK, MADE FROM POWDERED MIX, W/ HI VIT C	1
92570500	FLUID REPLACEMENT, 5% GLUCOSE IN WATER	1
92610020	Horchata beverage, made with water	1	NA
94000000	WATER AS AN INGREDIENT	1
94000100	WATER, TAP	1
95201200	Nutritional powder mix (EAS Whey Protein Powder)	1
95201300	Nutritional powder mix (EAS Soy Protein Powder)	1
95201500	Nutritional powder mix, high protein (Herbalife)	1
95201600	Nutritional powder mix (Isopure)	1
95201700	Nutritional powder mix (Kellogg's Special K20 Protein Water)	1
95202000	Nutritional powder mix (Muscle Milk)	1	Intended for water, but milk is a possibility; assuming water
95202010	Nutritional powder mix, light (Muscle Milk)	1
95220000	Nutritional powder mix, NFS	1
95220010	Nutritional powder mix, high protein, NFS	1
95230000	Nutritional powder mix, whey based, NFS	1
95230010	Nutritional powder mix, protein, soy based, NFS	1
95230020	Nutritional powder mix, protein, light, NFS	1
95230030	Nutritional powder mix, protein, NFS	1
95330500	Fluid replacement, 5% glucose in water	1	NA
11000000	MILK, HUMAN	NA
11100000	MILK, NFS	NA
11111000	MILK, COW'S, FLUID, WHOLE	NA
11111100	MILK, COW'S, FLUID, WHOLE, LOW SODIUM	NA
11111150	MILK, CALCIUM FORTIFIED, WHOLE, COW'S, FLUID	NA
11111160	MILK, CALCIUM FORTIFIED, COW'S, FLUID, 1% FAT	NA
11111170	MILK, CALCIUM FORTIFIED, SKIM/NONFAT, COW, FLUID	NA
11112110	MILK, COW'S, FLUID, 2% FAT	NA
11112120	MILK, COW'S, FLUID, ACIDOPHILUS, 1% FAT	NA
11112130	MILK, COW'S, FLUID, ACIDOPHILUS, 2% FAT	NA
11112210	MILK, COW'S, FLUID, 1% FAT	NA
11113000	MILK, COW'S, FLUID, SKIM OR NONFAT	NA
11114000	MILK, COW'S, FLUID, FILLED W/ VEG OIL, NS AS TO FAT	NA
11114100	MILK, COW'S, FLUID, FILLED W/ VEG OIL, WHOLE	NA
11114200	MILK, COW'S, FLUID, FILLED W/ VEG OIL, LOWFAT	NA
11114300	MILK, LOW LACTOSE, 1% FAT	NA
11114310	MILK, LOW LACTOSE, 1% FAT, FORTIFIED WITH CALCIUM	NA
11114320	MILK, LOW LACTOSE, NONFAT	NA
11114321	MILK, LOW LACTOSE, NONFAT, W/ CALCIUM	NA
11114330	MILK, COW'S FL LACTOSE REDUCED 2% FAT (LACTAID)	NA
11114350	MILK, COW'S, FLUID, LACTOSE REDUCED, WHOLE	NA
11115000	BUTTERMILK, FLUID (INCLUDE KEFIR MILK)	NA
11115100	BUTTERMILK, FLUID, 1% FAT	NA
11115200	BUTTERMILK, FLUID, 2% FAT	NA
11115300	BUTTERMILK, FLUID, WHOLE	NA
11115400	Kefir, NS as to fat content	NA	NA
11116000	MILK, GOAT'S, FLUID, WHOLE	NA
11210050	MILK, EVAPORATED, NS AS TO FAT CONTENT	NA
11211050	MILK, EVAPORATED, WHOLE	NA
11211400	MILK, EVAPORATED, 2% FAT	NA
11212050	MILK, EVAPORATED, SKIM	NA
11220000	MILK, CONDENSED, SWEETENED	NA
11300100	Non-dairy milk, NFS	NA	NA
11320000	MILK, SOY, READY-TO-DRINK, NOT BABY	NA
11320100	MILK, SOY, LIGHT, READY-TO-DRINK, NOT BABY'S	NA
11320200	MILK, SOY, NONFAT, READY-TO-DRINK, NOT BABY'S	NA
11321000	MILK, SOY, READY-TO-DRINK, NOT BABY'S, CHOCOLATE	NA
11321100	MILK, SOY, LIGHT, READY-TO-DRINK, NOT BABY'S, CHOCOLATE	NA
11321200	MILK, SOY, NONFAT, READY-TO-DRINK, NOT BABY'S, CHOCOLATE	NA
11340000	MILK,IMITATION,FLUID,NONSOY,SWEETENED,NOT CHOCOLATE	NA
11350000	Almond milk, sweetened	NA	NA
11350010	Almond milk, sweetened, chocolate	NA	NA
11350020	Almond milk, unsweetened	NA	NA
11350030	Almond milk, unsweetened, chocolate	NA	NA
11360000	Rice milk	NA	NA
11370000	Coconut milk	NA	NA
11400000	Yogurt, NFS	NA	NA
11400010	Yogurt, Greek, NS as to type of milk or flavor	NA	NA
11410000	YOGURT, NS AS TO TYPE OF MILK/FLAVOR	NA
11411010	YOGURT, PLAIN, NS AS TO TYPE OF MILK	NA
11411100	YOGURT, PLAIN, WHOLE MILK	NA
11411200	YOGURT, PLAIN, LOWFAT MILK	NA
11411300	YOGURT, PLAIN, NONFAT MILK	NA
11411390	Yogurt, Greek, NS as to type of milk, plain	NA	NA
11411400	Yogurt, Greek, whole milk, plain	NA	NA
11411410	Yogurt, Greek, low fat milk, plain	NA	NA
11411420	Yogurt, Greek, nonfat milk, plain	NA	NA
11420000	YOGURT, VANILLA, LEMON, COFFEE, NS AS TO MILK TYPE	NA
11421000	YOGURT, VANILLA, LEMON, COFFEE, WHOLE MILK	NA
11422000	YOGURT, VANILLA, LEMON, COFFEE, LOWFAT MILK	NA
11422100	YOGURT, VANILLA, LEMON, COFFEE, LOWFAT MILK, LOW CAL SWTNR	NA
11423000	YOGURT, VANILLA, LEMON, COFFEE, NONFAT MILK	NA
11424000	YOGURT, VANILLA, LEMON, COFFEE, NONFAT MILK, LOW CAL SWEET	NA
11424500	Yogurt, Greek, vanilla, whole milk	NA	NA
11424510	Yogurt, Greek, vanilla, low fat	NA	NA
11424520	Yogurt, Greek, vanilla, nonfat	NA	NA
11425000	YOGURT, CHOCOLATE, NS AS TO TYPE OF MILK	NA
11426000	YOGURT, CHOCOLATE, WHOLE MILK	NA
11427000	YOGURT, CHOCOLATE, NONFAT MILK	NA
11428000	Yogurt, Greek, chocolate, nonfat	NA	NA
11430000	YOGURT, FRUIT VARIETY, NS AS TO MILK TYPE	NA
11431000	YOGURT, FRUIT VARIETY, WHOLE MILK	NA
11432000	YOGURT, FRUIT VARIETY, LOWFAT MILK	NA
11432500	YOGURT, FRUIT VARIETY, LOWFAT MILK, W/ LOW CAL SWEETENER	NA
11433000	YOGURT, FRUIT VARIETY, NONFAT MILK	NA
11433500	YOGURT, FRUITED, NONFAT MILK, LOW CAL SWEETENER	NA
11433990	Yogurt, Greek, NS as to type of milk, fruit	NA	NA
11434000	Yogurt, Greek, whole milk, fruit	NA	NA
11434010	Yogurt, Greek, low fat milk, fruit	NA	NA
11434020	Yogurt, Greek, nonfat milk, fruit	NA	NA
11434090	Yogurt, NS as to type of milk, flavors other than fruit	NA	NA
11434100	Yogurt, whole milk, flavors other than fruit	NA	NA
11434200	Yogurt, low fat milk, flavors other than fruit	NA	NA
11434300	Yogurt, nonfat milk, flavors other than fruit	NA	NA
11435000	Yogurt, Greek, NS as to type of milk, flavors other than fruit	NA	NA
11435010	Yogurt, Greek, whole milk, flavors other than fruit	NA	NA
11435020	Yogurt, Greek, low fat milk, flavors other than fruit	NA	NA
11435030	Yogurt, Greek, nonfat milk, flavors other than fruit	NA	NA
11435100	Yogurt, Greek, with oats	NA	NA
11436000	Yogurt, liquid	NA	NA
11440010	Chipotle dip, yogurt based	NA	NA
11440020	Dill dip, yogurt based	NA	NA
11440030	Onion dip, yogurt based	NA	NA
11440040	Ranch dip, yogurt based	NA	NA
11440050	Spinach dip, yogurt based	NA	NA
11440060	Tzatziki dip	NA	NA
11440070	Vegetable dip, yogurt based	NA	NA
11444000	YOGURT, FRUIT & NUTS, NS AS TO TYPE OF MILK	NA
11445000	YOGURT, FRUIT & NUTS, LOWFAT MILK	NA
11446000	FRUIT AND LOWFAT YOGURT PARFAIT	NA
11459990	YOGURT, FROZEN, NS AS TO FLAVOR, NS TO TYPE OF MILK	NA
11460000	YOGURT, FROZEN, NOT CHOCOLATE, TYPE OF MILK NS	NA
11460100	YOGURT, FROZEN, CHOCOLATE, TYPE OF MILK NS	NA
11460150	YOGURT, FROZEN, NS AS TO FLAVOR, LOWFAT MILK	NA
11460160	YOGURT, FROZEN, CHOCOLATE, LOWFAT MILK	NA
11460170	YOGURT, FROZEN, NOT CHOCOLATE, LOWFAT MILK	NA
11460190	YOGURT, FROZEN, NS AS TO FLAVOR, NONFAT MILK	NA
11460200	YOGURT, FROZEN, CHOCOLATE, NONFAT MILK	NA
11460250	YOGURT,FROZEN,NOT CHOCOLATE,W/ SORBET/SORBET-COATED	NA
11460300	YOGURT, FROZEN, NOT CHOCOLATE, NONFAT MILK	NA
11460400	YOGURT,FRZ,CHOCOLATE,NONFAT MILK,W/ LOW-CAL SWEET	NA
11460410	YOGURT,FRZ,NOT CHOC,NONFAT MILK,W/ LOW-CAL SWEET	NA
11460420	YOGURT, FROZEN, NS AS TO FLAVOR, WHOLE MILK	NA
11460430	YOGURT, FROZEN, CHOCOLATE, WHOLE MILK	NA
11460440	YOGURT, FROZEN, NOT CHOCOLATE, WHOLE MILK	NA
11460500	Frozen yogurt, soft serve, vanilla	NA	NA
11460510	Frozen yogurt, soft serve, chocolate	NA	NA
11461000	YOGURT, FROZEN, CHOCOLATE-COATED	NA
11461100	YOGURT, FROZEN, CAROB-COATED	NA
11461200	YOGURT, FROZEN, SANDWICH	NA
11461210	Frozen yogurt bar, vanilla	NA	NA
11461220	Frozen yogurt bar, chocolate	NA	NA
11461250	YOGURT, FROZEN, CONE, CHOCOLATE	NA
11461260	YOGURT, FROZEN, CONE, NOT CHOCOLATE	NA
11461270	YOGURT, FROZEN, CONE, NOT CHOCOLATE, LOWFAT MILK	NA
11461280	YOGURT, FROZ, CONE, CHOCOLATE, LOWFAT MILK	NA
11461300	Frozen yogurt cone, vanilla, waffle cone	NA	NA
11461320	Frozen yogurt cone, chocolate, waffle cone	NA	NA
11480010	YOGURT, WHOLE MILK, BF	NA
11480020	YOGURT, WHOLE MILK, BF, W/FRUIT& MULTIGRAIN CEREAL,NFS	NA
11480030	YOGURT, WHOLE MILK, BF, W/FRUIT&MULTIGRAIN CEREAL + IRON	NA
11480040	YOGURT, WHOLE MILK, BF, W/FRUIT&MULTIGRAIN CEREAL + DHA	NA
11511000	MILK, CHOCOLATE, NFS	NA
11511100	MILK, CHOCOLATE, WHOLE MILK BASED	NA
11511200	MILK, CHOCOLATE, RED FAT, 2%	NA
11511300	MILK, CHOCOLATE, SKIM MILK BASED	NA
11511400	MILK, CHOCOLATE, LOWFAT MILK BASED	NA
11511550	Chocolate milk, ready to drink, reduced sugar, NS as to milk	NA	NA
11511600	Chocolate milk, ready to drink, low fat (Nesquik)	NA	NA
11511610	Chocolate milk, ready to drink, fat free (Nesquik)	NA	NA
11511700	Chocolate milk, ready to drink, low fat, no sugar added (Nesquik)	NA	NA
11512000	COCOA,HOT CHOCOLATE,NOT FROM DRY MIX, W/WHOLE MILK	NA
11512010	Hot chocolate / Cocoa, ready to drink	NA	NA
11512020	Hot chocolate / Cocoa, ready to drink, made with nonfat milk	NA	NA
11512030	Hot chocolate / Cocoa, ready to drink, made with non-dairy milk	NA	NA
11512100	Hot chocolate / Cocoa, ready to drink, with whipped cream	NA	NA
11512110	Hot chocolate / Cocoa, ready to drink, made with nonfat milk and whipped cream	NA	NA
11512120	Hot chocolate / Cocoa, ready to drink, made with non-dairy milk and whipped cream	NA	NA
11512500	HOT CHOCOLATE, P.R., MADE W/ WHOLE MILK	NA
11512510	HOT CHOCOLATE, P.R., MADE W/ LOW FAT MILK	NA
11513000	COCOA & SUGAR MIXTURE, MILK ADDED, NS TYPE MILK	NA
11513100	COCOA & SUGAR MIXTURE, WHOLE MILK ADDED	NA
11513150	COCOA & SUGAR MIXTURE, REDUCED FAT MILK ADDED	NA
11513200	COCOA & SUGAR MIXTURE, LOWFAT MILK ADDED	NA
11513300	COCOA & SUGAR MIXTURE, SKIM MILK ADDED	NA
11513310	Chocolate milk, made from dry mix with non-dairy milk	NA	NA
11513350	Chocolate milk, made from reduced sugar mix, NS as to type of milk	NA	NA
11513355	Chocolate milk, made from reduced sugar mix with whole milk	NA	NA
11513360	Chocolate milk, made from reduced sugar mix with reduced fat milk	NA	NA
11513365	Chocolate milk, made from reduced sugar mix with low fat milk	NA	NA
11513370	Chocolate milk, made from reduced sugar mix with fat free milk	NA	NA
11513375	Chocolate milk, made from reduced sugar mix with non-dairy milk	NA	NA
11513380	Chocolate milk, made from dry mix, NS as to type of milk (Nesquik)	NA	NA
11513381	Chocolate milk, made from dry mix with whole milk (Nesquik)	NA	NA
11513382	Chocolate milk, made from dry mix with reduced fat milk (Nesquik)	NA	NA
11513383	Chocolate milk, made from dry mix with low fat milk (Nesquik)	NA	NA
11513384	Chocolate milk, made from dry mix with fat free milk (Nesquik)	NA	NA
11513385	Chocolate milk, made from dry mix with non-dairy milk (Nesquik)	NA	NA
11513390	Chocolate milk, made from no sugar added dry mix, NS as to type of milk (Nesquik)	NA	NA
11513391	Chocolate milk, made from no sugar added dry mix with whole milk (Nesquik)	NA	NA
11513392	Chocolate milk, made from no sugar added dry mix with reduced fat milk (Nesquik)	NA	NA
11513393	Chocolate milk, made from no sugar added dry mix with low fat milk (Nesquik)	NA	NA
11513394	Chocolate milk, made from no sugar added dry mix with fat free milk (Nesquik)	NA	NA
11513395	Chocolate milk, made from no sugar added dry mix with non-dairy milk (Nesquik)	NA	NA
11513400	CHOCOLATE SYRUP, MILK ADDED, NS AS TO TYPE OF MILK	NA
11513500	CHOCOLATE SYRUP, WHOLE MILK ADDED	NA
11513550	CHOCOLATE SYRUP, RED FAT MILK ADDED	NA
11513600	CHOCOLATE SYRUP, LOWFAT MILK ADDED	NA
11513700	CHOCOLATE SYRUP, SKIM MILK ADDED	NA
11513750	Chocolate milk, made from syrup with non-dairy milk	NA	NA
11513800	Chocolate milk, made from light syrup, NS as to type of milk	NA	NA
11513801	Chocolate milk, made from light syrup with whole milk	NA	NA
11513802	Chocolate milk, made from light syrup with reduced fat milk	NA	NA
11513803	Chocolate milk, made from light syrup with low fat milk	NA	NA
11513804	Chocolate milk, made from light syrup with fat free milk	NA	NA
11513805	Chocolate milk, made from light syrup with non-dairy milk	NA	NA
11513850	Chocolate milk, made from sugar free syrup, NS as to type of milk	NA	NA
11513851	Chocolate milk, made from sugar free syrup with whole milk	NA	NA
11513852	Chocolate milk, made from sugar free syrup with reduced fat milk	NA	NA
11513853	Chocolate milk, made from sugar free syrup with low fat milk	NA	NA
11513854	Chocolate milk, made from sugar free syrup with fat free milk	NA	NA
11513855	Chocolate milk, made from sugar free syrup with non-dairy milk	NA	NA
11514110	Hot chocolate / Cocoa, made with dry mix and whole milk	NA	NA
11514120	Hot chocolate / Cocoa, made with dry mix and reduced fat milk	NA	NA
11514130	Hot chocolate / Cocoa, made with dry mix and low fat milk	NA	NA
11514140	Hot chocolate / Cocoa, made with dry mix and fat free milk	NA	NA
11514150	Hot chocolate / Cocoa, made with dry mix and non-dairy milk	NA	NA
11514320	Hot chocolate / Cocoa, made with no sugar added dry mix and whole milk	NA	NA
11514330	Hot chocolate / Cocoa, made with no sugar added dry mix and reduced fat milk	NA	NA
11514340	Hot chocolate / Cocoa, made with no sugar added dry mix and low fat milk	NA	NA
11514350	Hot chocolate / Cocoa, made with no sugar added dry mix and fat free milk	NA	NA
11514360	Hot chocolate / Cocoa, made with no sugar added dry mix and non-dairy milk	NA	NA
11515100	COCOA & SUGAR W/ MILK, FORTIFIED, PUERTO RICAN	NA
11516000	COCOA, WHEY, LO CAL SWEETNER MIX, LOWFAT MILK ADDED	NA
11519000	MILK BEVERAGE, NOT CHOCOLATE, W/ WHOLE MILK	NA
11519040	MILK, FLAVORS OTHER THAN CHOCOLATE, NFS	NA
11519050	MILK, NOT CHOCOLATE, WHOLE MILK BASED	NA
11519105	MILK, FLAVORS OTHER THAN CHOCOLATE, REDUCED FAT MILK-BASED	NA
11519200	MILK, FLAVORS OTHER THAN CHOCOLATE, LOWFAT MILK-BASED	NA
11519205	MILK, FLAVORS OTHER THAN CHOCOLATE, SKIM-MILK BASED	NA
11519210	Strawberry milk, reduced sugar	NA	NA
11519215	Strawberry milk, non-dairy	NA	NA
11520000	MILK, MALTED, UNFORTIFIED, FLAVOR NS	NA
11521000	MILK, MALTED, UNFORTIFIED, CHOCOLATE FLAVOR	NA
11522000	MILK, MALTED, UNFORTIFIED, NATURAL FLAVOR	NA
11525000	MILK,MALTED,FORTIFIED,NATURAL FLAVOR (INCL OVALTINE	NA
11526000	MILK, MALTED, FORTIFIED, CHOCOLATE (INCL OVALTINE)	NA
11527000	MILK, MALTED, FORTIFIED, (INCL OVALTINE)	NA
11531000	EGGNOG, MADE W/ WHOLE MILK (INCLUDE EGG NOG, NFS)	NA
11531500	EGGNOG, MADE W/ 2% REDUCED FAT MILK	NA
11541000	MILK SHAKE, NS AS TO FLAVOR OR TYPE	NA
11541100	MILK SHAKE,HOMEMADE/ FOUNTAIN-TYPE, NS AS TO FLAVOR	NA
11541110	MILK SHAKE, HOMEMADE OR FOUNTAIN-TYPE, CHOCOLATE	NA
11541120	MILK SHAKE, HOMEMADE/FOUNTAIN-TYPE, NOT CHOCOLATE	NA
11541130	Milk shake, home recipe, chocolate, light	NA	NA
11541135	Milk shake, home recipe, flavors other than chocolate, light	NA	NA
11541400	MILK SHAKE WITH MALT (INCL MALTED MILK W/ICE CREAM)	NA
11541500	MILK SHAKE, MADE W/ SKIM MILK, CHOCOLATE	NA
11541510	MILK SHAKE,MADE W/ SKIM MILK, NOT CHOCOLATE	NA
11542000	CARRY-OUT MILK SHAKE, NS AS TO FLAVOR	NA
11542100	CARRY-OUT MILK SHAKE, CHOCOLATE	NA
11542200	CARRY-OUT MILK SHAKE, NOT CHOCOLATE	NA
11543000	Milk shake, bottled, chocolate	NA	NA
11543010	Milk shake, bottled, flavors other than chocolate	NA	NA
11551050	MILK FRUIT DRINK (INCL LICUADO)	NA
11552200	ORANGE JULIUS	NA
11553000	FRUIT SMOOTHIE DRINK, W/ FRUIT OR JUICE & DAIRY PRODUCTS	NA
11553100	FRUIT SMOOTHIE DRINK, NFS	NA
11553110	Fruit smoothie, with whole fruit and dairy	NA	NA
11553120	Fruit smoothie, with whole fruit and dairy, added protein	NA	NA
11553130	Fruit smoothie juice drink, with dairy	NA	NA
11560000	CHOC-FLAVORED DRINK, WHEY-&MILK-BASED(INCL YOO-HOO)	NA
11560020	MILK DRINK, WHEY&MILK-BASE, NOT CHOC (INCL YOO-HOO)	NA
11561000	CAFE CON LECHE	NA
11561010	CAFE CON LECHE PREPARED W/ SUGAR	NA
11611000	INSTANT BREAKFAST, FLUID, CANNED	NA
11612000	INSTANT BREAKFAST, POWDER, MILK ADDED	NA
11613000	INSTANT BFAST,PWDR,SWT W/ LO CAL SWT, MILK ADDED	NA
11622010	DIET BEVERAGE,PWDR,RECONST W/SKIM (INCL CARNATION)	NA
11623000	MEAL SUPPLEMENT / REPLACEMENT,PREPARED,RTD	NA
11641000	MEAL REPLACEMENT, MILK BASED, HIGH PROTEIN, LIQUID	NA
11641020	MEAL REPLACEMENT OR SUPPLEMENT, MILK BASED, RTD	NA
11710000	INFANT FORMULA, NFS	NA
11710050	SIMILAC ALIMENTUM, W/ IRON, INFANT FORMULA, NS FORM	NA
11710051	SIMILAC ALIMENTUM, W/ IRON, INFANT FORMULA, RTF	NA
11710053	SIMILAC ALIMENTUM, W/ IRON, INFANT FORMULA, PREP FROM PDR	NA
11710055	Infant formula, powder, made with plain bottled water (Similac Expert Care Alimentum)	NA	NA
11710056	Infant formula, powder, made with baby water (Similac Expert Care Alimentum)	NA	NA
11710060	SIMILAC ALIMENTUM ADVANCE, W/ IRON, INF FORMULA, NS FORM	NA
11710061	SIMILAC ALIMENTUM ADVANCE, W/ IRON, INF FORMULA, RTF	NA
11710063	SIMILAC ALIMENTUM ADVANCE, W/ IRON,INF FORMULA,PREP FROM PDR	NA
11710100	ENFAMIL, LOW IRON, INFANT FORMULA, NS AS TO FORM	NA
11710101	ENFAMIL, LOW IRON, INFANT FORMULA, READY-TO-FEED	NA
11710102	ENFAMIL, LOW IRON, INFANT FORMULA, FROM LIQUID CONCENTRATE	NA
11710103	ENFAMIL, LOW IRON, INFANT FORMULA, PREPARED FROM POWDER	NA
11710200	SIMILAC, LOW IRON, INFANT FORMULA, NS AS TO FORM	NA
11710201	SIMILAC, LOW IRON, INFANT FORMULA, READY-TO-FEED	NA
11710202	SIMILAC, LOW IRON, INFANT FORMULA, FROM LIQUID CONCENTRATE	NA
11710203	SIMILAC, LOW IRON, INFANT FORMULA, PREPARED FROM POWDER	NA
11710250	SIMILAC NATURAL CARE ADVANCE,LOW IRON,W/ARA&DHA,INF,NS FORM	NA
11710251	SIMILAC NATURAL CARE ADVANCE, LOW IRON,W/ ARA&DHA, INF, RTF	NA
11710350	SIMILAC ADVANCE, W/ IRON, INFANT FORMULA, NS FORM	NA
11710351	SIMILAC ADVANCE, W/ IRON, INFANT FORMULA, RTF	NA
11710352	SIMILAC ADVANCE, W/ IRON, INFANT FORMULA, FROM LIQ CONC	NA
11710353	SIMILAC ADVANCE, W/ IRON, INFANT FORMULA, PREP FROM PDR	NA
11710355	Infant formula, liquid concentrate, made with plain bottled water (Similac Advance)	NA	NA
11710356	Infant formula, liquid concentrate, made with baby water (Similac Advance)	NA	NA
11710358	Infant formula, powder, made with plain bottled water (Similac Advance)	NA	NA
11710359	Infant formula, powder, made with baby water (Similac Advance)	NA	NA
11710360	Infant formula, NS as to form (Similac Advance Organic)	NA	NA
11710361	Infant formula, ready-to-feed (Similac Advance Organic)	NA	NA
11710368	Infant formula, powder, made with plain bottled water (Similac Advance Organic)	NA	NA
11710369	Infant formula, powder, made with baby water (Similac Advance Organic)	NA	NA
11710370	SIMILAC SENSITIVE, W/IRON, ARA&DHA, INFANT FORMULA, NS FORM	NA
11710371	SIMILAC SENSITIVE, W/ IRON, ARA&DHA, INFANT FORMULA, RTF	NA
11710372	SIMILAC SENSITIVE, W/ IRON, ARA&DHA,INF FORMULA, FR LIQ CONC	NA
11710373	SIMILAC SENSITIVE, W/IRON, ARA&DHA,INF FORMULA,PREP FR PDR	NA
11710375	Infant formula, liquid concentrate, made with plain bottled water (Similac Sensitive)	NA	NA
11710376	Infant formula, liquid concentrate, made with baby water (Similac Sensitive)	NA	NA
11710378	Infant formula, powder, made with plain bottled water (Similac Sensitive)	NA	NA
11710379	Infant formula, powder, made with baby water (Similac Sensitive)	NA	NA
11710380	Infant formula, NS as to form (Similac for Spit-Up)	NA	NA
11710381	Infant formula, ready-to-feed (Similac for Spit-Up)	NA	NA
11710388	Similac Sensitive for Spit-Up, infant formula, prepared from powder, made with plain bottled water	NA	NA
11710389	Similac Sensitive for Spit-Up, infant formula, prepared from powder, made with baby water	NA	NA
11710400	SIMILAC W/ IRON, INFANT FORMULA, NS AS TO FORM	NA
11710401	SIMILAC W/ IRON, INFANT FORMULA, READY-TO-FEED	NA
11710402	SIMILAC W/ IRON, INFANT FORMULA, FROM LIQUID CONCENTRATE	NA
11710403	SIMILAC W/ IRON, INFANT FORMULA, PREPARED FROM POWDER	NA
11710450	SIMILAC SPECIAL CARE ADVANCE 24, W/IRON, ARA&DHA,INF,NS FORM	NA
11710451	SIMILAC SPECIAL CARE ADVANCE 24, W/IRON, ARA&DHA, INF,RTF	NA
11710470	SIMILAC NEOSURE, W/ IRON, ARA&DHA, INFANT FORMULA, NS FORM	NA
11710471	SIMILAC NEOSURE, W/ IRON, ARA&DHA, INFANT FORMULA, RTF	NA
11710473	SIMILAC NEOSURE, W/ IRON, ARA&DHA,INFANT FORMULA,PREP FR PDR	NA
11710478	Infant formula, powder, made with plain bottled water (Similac Expert Care NeoSure)	NA	NA
11710479	Infant formula, powder, made with baby water (Similac Expert Care NeoSure)	NA	NA
11710480	Infant formula, NS as to form (Similac Go and Grow)	NA	NA
11710483	Similac Go and Grow, infant formula, prepared from powder, made with plain bottled water	NA	NA
11710484	Similac Go and Grow, infant formula, prepared from powder, made with baby water	NA	NA
11710600	ENFAMIL W/ IRON, INFANT FORMULA, NS AS TO FORM	NA
11710601	ENFAMIL W/ IRON, INFANT FORMULA, READY-TO-FEED	NA
11710602	ENFAMIL W/ IRON, INFANT FORMULA, FROM LIQUID CONCENTRATE	NA
11710603	ENFAMIL, W/ IRON, INFANT FORMULA, PREP FROM PDR	NA
11710620	Infant formula, NS as to form (Enfamil Newborn)	NA	NA
11710621	Infant formula, ready-to-feed (Enfamil Newborn)	NA	NA
11710628	Infant formula, powder, made with plain bottled water (Enfamil Newborn)	NA	NA
11710629	Infant formula, powder, made with baby water (Enfamil Newborn)	NA	NA
11710630	Infant formula, NS as to form (Enfamil Infant)	NA	NA
11710631	Infant formula, ready-to-feed (Enfamil Infant)	NA	NA
11710634	Infant formula, liquid concentrate, made with plain bottled water (Enfamil Infant)	NA	NA
11710635	Infant formula, liquid concentrate, made with baby water (Enfamil Infant)	NA	NA
11710638	Infant formula, powder, made with plain bottled water (Enfamil Infant)	NA	NA
11710639	Infant formula, powder, made with baby water (Enfamil Infant)	NA	NA
11710640	Enfamil PREMIUM LIPIL, infant formula, NS as to form	NA	NA
11710642	Enfamil PREMIUM LIPIL, infant formula, prepared from liquid concentrate, made with water, NFS	NA	NA
11710645	Enfamil PREMIUM LIPIL, infant formula, prepared from liquid concentrate, made with plain bottled water	NA	NA
11710646	Enfamil PREMIUM LIPIL, infant formula, prepared from liquid concentrate, made with baby water	NA	NA
11710648	Enfamil PREMIUM LIPIL, infant formula, prepared from powder, made with plain bottled water	NA	NA
11710649	Enfamil PREMIUM LIPIL, infant formula, prepared from powder, made with baby water	NA	NA
11710650	ENFAMIL LIPIL, W/ IRON, INFANT FORMULA, NS FORM	NA
11710651	ENFAMIL LIPIL, W/ IRON, INFANT FORMULA, RTF	NA
11710652	ENFAMIL LIPIL, W/ IRON, INFANT FORMULA, FROM LIQ CONC	NA
11710653	ENFAMIL LIPIL, W/ IRON, INFANT FORMULA, PREP FROM PDR	NA
11710655	Enfamil LIPIL, infant formula, prepared from liquid concentrate, made with plain bottled water	NA	NA
11710656	Enfamil LIPIL, infant formula, prepared from liquid concentrate, made with baby water	NA	NA
11710658	Enfamil LIPIL, infant formula, prepared from powder, made with plain bottled water	NA	NA
11710659	Enfamil LIPIL, infant formula, prepared from powder, made with baby water	NA	NA
11710660	ENFAMIL A.R. LIPIL, INFANT FORMULA, NS AS TO FORM	NA
11710661	ENFAMIL A.R. LIPIL, INFANT FORMULA, READY-TO-FEED	NA
11710663	ENFAMIL A.R. LIPIL, INFANT FORMULA, PREP FROM POWDER	NA
11710665	ENFAMIL ENFACARE LIPIL W/IRON, INFANT FORMULA, NS FORM	NA
11710666	ENFAMIL ENFACARE LIPIL W/IRON, INFANT FORMULA, RTF	NA
11710667	ENFAMIL ENFACARE LIPIL W/IRON, INFANT FORMULA, PREP FROM PDR	NA
11710668	Infant formula, powder, made with plain bottled water (Enfamil A.R.)	NA	NA
11710669	Infant formula, powder, made with baby water (Enfamil A.R.)	NA	NA
11710670	ENFAMIL GENTLEASE LIPIL, W/ IRON, INF FORMULA, NS FORM	NA
11710671	Infant formula, ready-to-feed (Enfamil Gentlease)	NA	NA
11710673	ENFAMIL GENTLEASE LIPIL, W/ IRON, INF FORMULA, PREP FROM PDR	NA
11710675	Infant formula, powder, made with plain bottled water (Enfamil EnfaCare)	NA	NA
11710676	Infant formula, powder, made with baby water (Enfamil EnfaCare)	NA	NA
11710678	Infant formula, powder, made with plain bottled water (Enfamil Gentlease)	NA	NA
11710679	Infant formula, powder, made with baby water (Enfamil Gentlease)	NA	NA
11710680	ENFAMIL NEXT STEP LIPIL, W/IRON, INFANT FORMULA, NS FORM	NA
11710681	ENFAMIL NEXT STEP LIPIL, W/ IRON, INFANT FORMULA, RTF	NA
11710683	ENFAMIL NEXT STEP LIPIL, W/ IRON, INFANT FORMULA, PREP PDR	NA
11710688	Infant formula, powder, made with plain bottled water (Enfamil Enfagrow Toddler Transitions)	NA	NA
11710689	Infant formula, powder, made with baby water (Enfamil Enfagrow Toddler Transitions)	NA	NA
11710690	Infant formula, NS as to form (Enfamil Enfagrow Toddler Transitions Gentlease)	NA	NA
11710698	Infant formula, powder, made with plain bottled water (Enfamil Enfagrow Toddler Transitions Gentlease)	NA	NA
11710699	Infant formula, powder, made with baby water (Enfamil Enfagrow Toddler Transitions Gentlease)	NA	NA
11710710	LACTOFREE, W/ IRON, INFANT FORMULA, NS FORM	NA
11710711	LACTOFREE, W/ IRON, INFANT FORMULA, RTF	NA
11710712	LACTOFREE, W/ IRON, INFANT FORMULA, FROM LIQ CONC	NA
11710713	LACTOFREE, W/ IRON, INFANT FORMULA, PREP FROM PDR	NA
11710720	ENFAMIL LACTOFREE LIPIL, W/ IRON, INF FORMULA, NS FORM	NA
11710721	ENFAMIL LACTOFREE LIPIL, W/IRON, INF FORMULA, RTF	NA
11710722	ENFAMIL LACTOFREE LIPIL, W/IRON, INF FORMULA, FROM LIQ CONC	NA
11710723	ENFAMIL LACTOFREE LIPIL,W/IRON, INF FORMULA, PREP FROM PDR	NA
11710800	PEDIASURE, W/ IRON, INFANT FORMULA, NS AS TO FORM	NA
11710801	PEDIASURE, W/ IRON, INFANT FORMULA, READY-TO-FEED	NA
11710805	PEDIASURE FIBER, W/ IRON, INFANT FORMULA, NS AS TO FORM	NA
11710806	PEDIASURE FIBER, W/ IRON, INFANT FORMULA, READY-TO-FEED	NA
11710900	GOOD START SUPREME, W IRON, INFANT FORMULA, NS FORM	NA
11710901	GOOD START SUPREME, W/ IRON, INFANT FORMULA, RTF	NA
11710902	GOOD START SUPREME, W/ IRON, INFANT FORMULA, FROM LIQ CONC	NA
11710903	GOOD START SUPREME, W/ IRON, INFANT FORMULA, PREP FROM PDR	NA
11710910	GOOD START SUPREME, W/ IRON, DHA & ARA, INF FORMULA, NS FORM	NA
11710911	GOOD START SUPREME, W/ IRON, DHA & ARA, INF FORMULA, RTF	NA
11710912	GOOD START SUPREME,W/ IRON,DHA&ARA,INF FORMULA,FROM LIQ CONC	NA
11710913	GOOD START SUPREME,W/ IRON,DHA&ARA,INF FORMULA,PREP FROM PDR	NA
11710915	Infant formula, liquid concentrate, made with plain bottled water (Gerber Good Start Gentle)	NA	NA
11710916	Infant formula, liquid concentrate, made with baby water (Gerber Good Start Gentle)	NA	NA
11710918	Infant formula, powder, made with plain bottled water (Gerber Good Start Gentle)	NA	NA
11710919	Infant formula, powder, made with baby water (Gerber Good Start Gentle)	NA	NA
11710920	Infant formula, NS as to form (Gerber Good Start Protect)	NA	NA
11710928	Infant formula, powder, made with plain bottled water (Gerber Good Start Protect)	NA	NA
11710929	Infant formula, powder, made with baby water (Gerber Good Start Protect)	NA	NA
11710930	Infant formula, NS as to form (Gerber Graduates Gentle)	NA	NA
11710938	Gerber Good Start 2 Gentle Plus, infant formula, prepared from powder, made with plain bottled water	NA	NA
11710939	Gerber Good Start 2 Gentle Plus, infant formula, prepared from powder, made with baby water	NA	NA
11710940	Infant formula, NS as to form (Gerber Graduates Protect)	NA	NA
11710948	Gerber Good Start 2 Protect Plus, infant formula, prepared from powder, made with plain bottled water	NA	NA
11710949	Gerber Good Start 2 Protect Plus, infant formula, prepared from powder, made with baby water	NA	NA
11710950	GOOD START 2 ESSENTIALS, W/ IRON, INFANT FORMULA, NS FORM	NA
11710951	GOOD START 2 ESSENTIALS, W/IRON, INFANT FORMULA, RTF	NA
11710952	GOOD START 2 ESSENTIALS, W/ IRON, INF FORMULA, FROM LIQ CONC	NA
11710953	GOOD START 2 ESSENTIALS, W/ IRON, INF FORMULA, PREP FROM PDR	NA
11710960	AMERICA'S STORE BRAND, WITH IRON, INFANT FORMULA, NS FORM	NA
11710961	AMERICA'S STORE BRAND, W/IRON, INFANT FORMULA, FROM LIQ CONC	NA
11710962	AMERICA'S STORE BRAND, W/IRON, INFANT FORMULA, PREP FROM PDR	NA
11710963	AMERICA'S STORE BRAND, W/ IRON, INFANT FORMULA, RTF	NA
11710965	Infant formula, liquid concentrate, made with plain bottled water (Store Brand)	NA	NA
11710966	Infant formula, liquid concentrate, made with baby water (Store Brand)	NA	NA
11710968	Infant formula, powder, made with plain bottled water (Store Brand)	NA	NA
11710969	Infant formula, powder, made with baby water (Store Brand)	NA	NA
11720300	ENFAMIL PROSOBEE, W/ IRON, INFANT FORMULA, NS FORM	NA
11720301	ENFAMIL PROSOBEE, W/ IRON, INFANT FORMULA, READY-TO-FEED	NA
11720302	ENFAMIL PROSOBEE, W/ IRON, INFANT FORMULA, FROM LIQ CONC	NA
11720303	ENFAMIL PROSOBEE, W/ IRON, INFANT FORMULA, PREP FROM PDR	NA
11720310	ENFAMIL PROSOBEE LIPIL, W/ IRON, INF FORMULA, NS FORM	NA
11720311	ENFAMIL PROSOBEE LIPIL, W/ IRON, INF FORMULA, RTF	NA
11720312	ENFAMIL PROSOBEE LIPIL, W/ IRON, INF FORMULA, FROM LIQ CONC	NA
11720313	ENFAMIL PROSOBEE LIPIL, W/ IRON, INF FORMULA, PREP FROM PDR	NA
11720315	Infant formula, liquid concentrate, made with plain bottled water (Enfamil ProSobee)	NA	NA
11720316	Infant formula, liquid concentrate, made with baby water (Enfamil ProSobee)	NA	NA
11720318	Infant formula, powder, made with plain bottled water (Enfamil ProSobee)	NA	NA
11720319	Infant formula, powder, made with baby water (Enfamil ProSobee)	NA	NA
11720320	Infant formula, NS as to form (Enfamil Enfagrow Toddler Transitions Soy)	NA	NA
11720328	Enfamil Enfagrow Soy Next Step LIPIL, infant formula, prepared from powder, made with plain bottled water	NA	NA
11720329	Enfamil Enfagrow Soy Next Step LIPIL, infant formula, prepared from powder, made with baby water	NA	NA
11720400	SIMILAC ISOMIL, WITH IRON, INFANT FORMULA, NS AS TO FORM	NA
11720401	SIMILAC ISOMIL, WITH IRON, INFANT FORMULA, READY-TO-FEED	NA
11720402	SIMILAC ISOMIL, WITH IRON, INFANT FORMULA, FROM LIQUID	NA
11720403	SIMILAC ISOMIL, W/IRON, INFANT FORMULA, PREPARED FROM POWDER	NA
11720410	SIMILAC ISOMIL ADVANCE W/IRON, INFANT FORMULA, NS FORM	NA
11720411	SIMILAC ISOMIL ADVANCE W/IRON, INFANT FORMULA, RTF	NA
11720412	SIMILAC ISOMIL ADVANCE W/IRON, INFANT FORMULA, FROM LIQ CONC	NA
11720413	SIMILAC ISOMIL ADVANCE W/IRON, INFANT FORMULA, PREP FROM PDR	NA
11720415	Infant formula, liquid concentrate, made with plain bottled water (Similac Isomil Soy)	NA	NA
11720416	Infant formula, liquid concentrate, made with baby water (Similac Isomil Soy)	NA	NA
11720418	Infant formula, powder, made with plain bottled water (Similac Isomil Soy)	NA	NA
11720419	Infant formula, powder, made with baby water (Similac Isomil Soy)	NA	NA
11720430	Infant formula, NS as to form (Similac Expert Care for Diarrhea)	NA	NA
11720431	Infant formula, ready-to-feed (Similac Expert Care for Diarrhea)	NA	NA
11720440	Similac Go and Grow Soy, infant formula, NS as to form	NA	NA
11720448	Similac Go and Grow Soy, infant formula, prepared from powder, made with plain bottled water	NA	NA
11720449	Similac Go and Grow Soy, infant formula, prepared from powder, made with baby water	NA	NA
11720600	GOOD START ESSENTIALS SOY, W/ IRON, INFANT FORMULA, NS FORM	NA
11720601	GOOD START ESSENTIALS SOY, W/ IRON, INFANT FORMULA, RTF	NA
11720602	GOOD START ESSENTIALS SOY, W/ IRON,INF FORMULA,FROM LIQ CONC	NA
11720603	GOOD START ESSENTIALS SOY, W/ IRON,INF FORMULA,PREP FROM PDR	NA
11720610	GOOD START SOY, W/ IRON, DHA & ARA, INF FORMULA, NS FORM	NA
11720611	GOOD START SOY, W/ IRON, DHA & ARA, INF FORMULA, RTF	NA
11720612	GOOD START SOY, W/ IRON, DHA & ARA, INF FORMULA, FR LIQ CONC	NA
11720613	GOOD START SOY, W/ IRON, DHA & ARA, INF FORMULA, PREP FR PDR	NA
11720615	Infant formula, liquid concentrate, made with plain bottled water (Gerber Good Start Soy)	NA	NA
11720616	Infant formula, liquid concentrate, made with baby water (Gerber Good Start Soy)	NA	NA
11720618	Infant formula, powder, made with plain bottled water (Gerber Good Start Soy)	NA	NA
11720619	Infant formula, powder, made with baby water (Gerber Good Start Soy)	NA	NA
11720620	Infant formula, NS as to form (Gerber Graduates Soy)	NA	NA
11720628	Gerber Good Start 2 Soy Plus, infant formula, prepared from powder, made with plain bottled water	NA	NA
11720629	Gerber Good Start 2 Soy Plus, infant formula, prepared from powder, made with baby water	NA	NA
11720703	NEXT STEP PROSOBEE, W/ IRON, INFANT FORMULA, PREP FROM PDR	NA
11720800	AMERICA'S STORE BRAND SOY, W/ IRON, INF FORMULA, NS FORM	NA
11720801	AMERICA'S STORE BRAND SOY, W/ IRON, INF FORMULA, RTF	NA
11720802	AMERICA'S STORE BRAND SOY, W/ IRON, INF FORMULA, FR LIQ CONC	NA
11720803	AMERICA'S STORE BRAND SOY, W/ IRON, INF FORMULA, PREP FR PDR	NA
11720805	America's Store Brand Soy, infant formula, prepared from liquid concentrate, made with plain bottled water	NA	NA
11720806	America's Store Brand Soy, infant formula, prepared from liquid concentrate, made with baby water	NA	NA
11720808	Infant formula, powder, made with plain bottled water (Store Brand Soy)	NA	NA
11720809	Infant formula, powder, made with baby water (Store Brand Soy)	NA	NA
11740300	NUTRAMIGEN, W/ IRON, INFANT FORMULA, NS AS TO FORM	NA
11740301	NUTRAMIGEN, W/ IRON, INFANT FORMULA, READY-TO-FEED	NA
11740302	NUTRAMIGEN, W/ IRON, INFANT FORMULA, FR LIQUID CONCENTRATE	NA
11740303	NUTRAMIGEN, W/ IRON, INFANT FORMULA, PREPARED FROM POWDER	NA
11740310	ENFAMIL NUTRAMIGEN LIPIL, W/IRON, INF FORMULA, NS FORM	NA
11740311	ENFAMIL NUTRAMIGEN LIPIL, W/IRON, INF FORMULA, RTF	NA
11740312	ENFAMIL NUTRAMIGEN LIPIL, W/IRON, INF FORMULA, FROM LIQ CONC	NA
11740313	ENFAMIL NUTRAMIGEN LIPIL, W/IRON, INF FORMULA, PREP FROM PDR	NA
11740315	Enfamil Nutramigen LIPIL, infant formula, prepared from liquid concentrate, made with plain bottled water	NA	NA
11740316	Enfamil Nutramigen LIPIL, infant formula, prepared from liquid concentrate, made with baby water	NA	NA
11740318	Enfamil Nutramigen LIPIL, infant formula, prepared from powder, made with plain bottled water	NA	NA
11740319	Enfamil Nutramigen LIPIL, infant formula, prepared from powder, made with baby water	NA	NA
11740320	Infant formula, NS as to form (PurAmino)	NA	NA
11740328	Enfamil Nutramigen AA LIPIL, infant formula, prepared from powder, made with plain bottled water	NA	NA
11740329	Enfamil Nutramigen AA LIPIL, infant formula, prepared from powder, made with baby water	NA	NA
11740400	PREGESTIMIL, W/ IRON, INFANT FORMULA, NS AS TO FORM	NA
11740401	Infant formula, ready-to-feed (Enfamil Pregestimil)	NA	NA
11740403	PREGESTIMIL, W/ IRON, INFANT FORMULA, PREPARED FROM POWDER	NA
11740408	Enfmail Pregestimil LIPIL, infant formula, prepared from powder, made with plain bottled water	NA	NA
11740409	Enfmail Pregestimil LIPIL, infant formula, prepared from powder, made with baby water	NA	NA
11740503	SIMILAC PM 60/40, LOW IRON, INFANT FORMULA, PREP FROM PDR	NA
11740510	Enfamil Premature LIPIL 20, low iron, infant formula, NS as to form	NA	NA
11740511	Infant formula, ready-to-feed, low iron (Enfamil Premature 20 Cal)	NA	NA
11740520	Enfamil Premature LIPIL 20, with iron, infant formula, NS as to form	NA	NA
11740521	Infant formula, ready-to-feed, with iron (Enfamil Premature 20 Cal)	NA	NA
11740540	Enfamil Premature LIPIL 24, low iron, infant formula, NS as to form	NA	NA
11740541	Enfamil Premature LIPIL 24, low iron, infant formula, ready-to-feed	NA	NA
11740550	Enfamil Premature LIPIL 24, with iron, infant formula, NS as to form	NA	NA
11740551	Enfamil Premature LIPIL 24, with iron, infant formula, ready-to-feed	NA	NA
11740600	PORTAGEN, W/ IRON, INFANT FORMULA, NS AS TO FORM	NA
11740603	PORTAGEN, W/ IRON, INFANT FORMULA, PREPARED FROM POWDER	NA
11810000	MILK, DRY, NOT RECONSTITUTED, NS AS TO FAT	NA
11811000	MILK, DRY, WHOLE, NOT RECONSTITUTED	NA
11812000	MILK, DRY, LOWFAT, NOT RECONSTITUTED	NA
11813000	MILK, DRY, NONFAT, NOT RECONSTITUTED	NA
11820000	BUTTERMILK, DRY, NOT RECONSTITUTED	NA
11825000	WHEY, SWEET, DRY	NA
11830100	COCOA W/DRY MILK & SUGAR, DRY MIX, NOT RECONST	NA
11830110	COCOA POWDER W/ NFD MILK, LOW CAL SWEETENER, DRY	NA
11830115	Hot chocolate / Cocoa, dry mix, no sugar added, not reconstituted	NA	NA
11830120	COCOA W/ WHEY, LO CAL SWEETENER, FORTIFIED, DRY MIX	NA
11830140	CHOCOLATE, INST, DRY MIX, FORTIFD, NOT RECONST,P.R.	NA
11830150	COCOA POWDER, NOT RECONSTITUTED (NO DRY MILK)	NA
11830160	COCOA-FLAVORED BEVERAGE POWDER W/ SUGAR, DRY MIX	NA
11830165	Chocolate beverage powder, light, dry mix, not reconstituted	NA	NA
11830170	COCOA, WHEY, LO CAL SWEETNER MIX, NOT RECONST	NA
11830200	MILK, MALTED, DRY, UNFORTIFD, NOT RECONST, NOT CHOC	NA
11830210	MILK, MALTED, DRY, FORTIFD, NOT RECONST, NOT CHOC	NA
11830250	MILK, MALTED, DRY, UNFORTIFIED, NOT RECONST, CHOC	NA
11830260	MILK, MALTED, DRY, FORTIFIED, NOT RECONST, CHOC	NA
11830400	MILK BEV POWDER, DRY, NOT RECONST, NOT CHOC	NA
11830450	MILK BEV MIX, W/ SUGAR,EGG WHITE, NOT RECONSTITUTED	NA
11830500	MILK BEV POWDER W/ NFD MILK, LOW CAL, DRY, CHOC	NA
11830550	MILK BEV POWDER W/ NFD MILK, LOW CAL, DRY, NOT CHOC	NA
11830800	INSTANT BREAKFAST POWDER, NOT RECONSTITUTED	NA
11830810	INSTANT BFAST,PWDR,SWT W/ LO CAL SWT,NOT RECONSTUT	NA
11830900	PROTEIN SUPPLEMENT, MILK BASED, DRY POWDER	NA
11830940	MEAL REPLACEMENT,PROTEIN,MILK BASED,FRUIT JUICE MIX	NA
11830970	MEAL REPLACEMENT, PROTEIN TYPE, MILK-BASE, POWDER	NA
11830990	NUTRIENT SUPP, MILK-BASE, POWDER (INCL SUSTAGEN)	NA
11831500	NUTRIENT SUPPLEMENT,MILK-BASE,HIGH PROT,NOT RECONST	NA
11832000	MEAL REPLACEMENT,MILK-&SOY-BASE,POWDER,NOT RECONST	NA
11836000	PROTEIN SUPPLEMENT, MILK-BASED, MUSCLE MILK, DRY POWDER	NA
11836100	PROTEIN SUPPLEMENT, MILK-BASED, MUSCLE MILK LIGHT, POWDERED	NA
12100100	CREAM, FLUID, NS AS TO LIGHT, HEAVY OR HALF & HALF	NA
12110100	CREAM, LIGHT, FLUID (INCL COFFEE CRM, TABLE CREAM)	NA
12110300	CREAM, LIGHT, WHIPPED, UNSWEETENED	NA
12120100	CREAM, HALF & HALF	NA
12120105	CREAM, HALF & HALF, LOW FAT	NA
12120106	Cream, half and half, flavored	NA	NA
12120110	CREAM, HALF & HALF, FAT FREE	NA
12130100	CREAM, HEAVY, FLUID	NA
12130200	CREAM, HEAVY, WHIPPED, UNSWEETENED	NA
12140000	CREAM, HEAVY, WHIPPED, SWEETENED	NA
12140100	CREAM, WHIPPED, PRESSURIZED CONTAINER	NA
12140105	CREAM, WHIPPED, PRESSURIZED CONTAINER, LIGHT	NA
12140110	WHIPPED TOPPING, DAIRY BASED, FAT FREE, PRESSURIZED CONTAINR	NA
12200100	CREAM SUBSTITUTE, NS AS TO FROZEN,LIQUID OR POWDER	NA
12210100	CREAM SUBSTITUTE, FROZEN	NA
12210200	CREAM SUBSTITUTE, LIQUID (INCLUDE COFFEE WHITNER)	NA
12210210	CREAM SUBSTITUTE, FLAVORED, LIQUID	NA
12210250	CREAM SUBSTITUTE, LIGHT, LIQUID	NA
12210255	CREAM SUBSTITUTE, LIGHT, FLAVORED, LIQUID	NA
12210260	CREAM SUBSTITUTE, FAT FREE, LIQUID	NA
12210270	CREAM SUBSTITUTE, FAT FREE, FLAVORED, LIQUID	NA
12210280	Coffee creamer, liquid, fat free, sugar free, flavored	NA	NA
12210305	CREAM SUBSTITUTE, SUGAR FREE, LIQUID	NA
12210310	CREAM SUBSTITUTE, SUGAR FREE, FLAVORED, LIQUID	NA
12210400	CREAM SUBSTITUTE, POWDERED	NA
12210410	CREAM SUBST, LIGHT, POWDERED (INCL COFFEE MATE, CRE	NA
12210420	CREAM SUBSTITUTE, FLAVORED, POWDERED	NA
12210430	CREAM SUBSTITUTE, FAT FREE, POWDER	NA
12210440	CREAM SUBSTITUTE, FAT FREE, FLAVORED, POWDER	NA
12210500	CREAM SUBSTITUTE, SUGAR FREE, POWDER	NA
12210505	CREAM SUBSTITUTE, SUGAR FREE, FLAVORED, POWDER	NA
12210520	Coffee creamer, soy, liquid	NA	NA
12220000	WHIPPED TOPPING, NONDAIRY, NS AS TO CND/FRZ/POWDER	NA
12220100	WHIPPED TOPPING, NONDAIRY, PRESSURIZED CAN	NA
12220200	WHIPPED TOPPING, NONDAIRY, FROZEN (INCL COOL WHIP)	NA
12220250	WHIPPED TOPPING, NONDAIRY, FZN, LOWFAT (INCL COOL)	NA
12220270	WHIPPED TOPPING, NONDAIRY, FROZEN, FAT FREE	NA
12220280	WHIPPED TOPPING, NONDAIRY, FROZEN, SUGAR FREE	NA
12220300	WHIPPED CREAM SUBST, NONDAIRY, FROM POWDERED MIX	NA
12220400	WHIP CREAM SUB,NONDAIRY,LOWFAT,LO SUGAR,FROM MIX	NA
12310100	SOUR CREAM (INCL W/ CHIVES)	NA
12310200	SOUR CREAM, HALF & HALF	NA
12310300	SOUR CREAM, REDUCED FAT	NA
12310350	SOUR CREAM, LIGHT	NA
12310370	SOUR CREAM, FAT FREE	NA
12320100	SOUR CREAM, IMITATION	NA
12320200	SOUR CREAM, FILLED, SOUR DRESSING, NONBUTTERFAT	NA
12350000	DIP, SOUR CREAM BASE (INCLUDE BUTTERMILK-TYPE DIP)	NA
12350010	Dip, NFS	NA	NA
12350020	DIP, SOUR CREAM BASE, REDUCED CALORIE	NA
12350100	SPINACH DIP	NA
12350110	Spinach and artichoke dip	NA	NA
12350200	Chipotle dip, regular	NA	NA
12350205	Chipotle dip, light	NA	NA
12350210	Dill dip, regular	NA	NA
12350215	Dill dip, light	NA	NA
12350220	Onion dip, regular	NA	NA
12350225	Onion dip, light	NA	NA
12350230	Ranch dip, regular	NA	NA
12350235	Ranch dip, light	NA	NA
12350240	Spinach dip, regular	NA	NA
12350245	Spinach dip, light	NA	NA
12350250	Vegetable dip, regular	NA	NA
12350255	Vegetable dip, light	NA	NA
13110000	ICE CREAM, NFS	NA
13110100	ICE CREAM, REGULAR, NOT CHOCOLATE	NA
13110102	Ice cream, vanilla, with additional ingredients	NA	NA
13110110	ICE CREAM, REGULAR, CHOCOLATE	NA
13110112	Ice cream, chocolate, with additional ingredients	NA	NA
13110120	ICE CREAM, RICH, FLAVORS OTHER THAN CHOCOLATE	NA
13110130	ICE CREAM, RICH, CHOCOLATE	NA
13110140	ICE CREAM, RICH, NS AS TO FLAVOR	NA
13110200	ICE CREAM, SOFT SERVE, NOT CHOCOLATE	NA
13110210	ICE CREAM, SOFT SERVE, CHOCOLATE	NA
13110220	ICE CREAM, SOFT SERVE, NS AS TO FLAVOR	NA
13110310	ICE CREAM, NO SUGAR ADDED, NS AS TO FLAVOR	NA
13110320	ICE CREAM, NO SUGAR ADDED, FLAVORS OTHER THAN CHOCOLATE	NA
13110330	ICE CREAM, NO SUGAR ADDED, CHOCOLATE	NA
13110460	Gelato, vanilla	NA	NA
13110470	Gelato, chocolate	NA	NA
13120050	ICE CREAM BAR OR STICK, NOT CHOC- OR CAKE-COVERED	NA
13120100	ICE CREAM BAR/STICK, CHOCOLATE COVERED	NA
13120110	ICE CREAM BAR, CHOCOLATE/CARAMEL COVERED, W/ NUTS	NA
13120120	ICE CREAM BAR,RICH CHOC ICE CREAM,THICK CHOC COVER	NA
13120121	ICE CREAM BAR,RICH ICE CREAM,THICK CHOC COVER	NA
13120130	ICE CREAM BAR/STICK,RICH ICE CREAM,CHOC COVER,W/NUT	NA
13120140	ICE CREAM BAR/STICK, CHOC ICE CREAM, CHOC COVER	NA
13120300	ICE CREAM BAR, CAKE-COVERED	NA
13120310	Ice cream bar, stick or nugget, with crunch coating	NA	NA
13120400	ICE CREAM BAR/STICK W/ FRUIT	NA
13120500	ICE CREAM SANDWICH	NA
13120510	Ice cream sandwich, chocolate	NA	NA
13120550	ICE CREAM COOKIE SANDWICH (INCLUDE CHIPWICH)	NA
13120700	ICE CREAM CONE, W/ NUTS, NOT CHOCOLATE	NA
13120710	ICE CREAM CONE, CHOC-COVERED, W/ NUTS, NOT CHOC	NA
13120720	ICE CREAM CONE, CHOC-COVERED OR DIPPED, NOT CHOC	NA
13120730	ICE CREAM CONE, NO TOPPING, NOT CHOCOLATE	NA
13120735	Ice cream cone, scooped, vanilla, waffle cone	NA	NA
13120740	ICE CREAM CONE, NO TOPPING, NS AS TO FLAVOR	NA
13120750	ICE CREAM CONE, W/NUTS, CHOCOLATE ICE CREAM	NA
13120760	ICE CREAM CONE, CHOC-COVERED, CHOC ICE CREAM	NA
13120770	ICE CREAM CONE, NO TOPPING, CHOCOLATE ICE CREAM	NA
13120775	Ice cream cone, scooped, chocolate, waffle cone	NA	NA
13120780	ICE CREAM CONE, CHOC-COVERED, W/NUT, CHOC ICE CREAM	NA
13120782	Ice cream cone, soft serve, vanilla	NA	NA
13120784	Ice cream cone, soft serve, chocolate	NA	NA
13120786	Ice cream cone, soft serve, vanilla, waffle cone	NA	NA
13120788	Ice cream cone, soft serve, chocolate, waffle cone	NA	NA
13120790	ICE CREAM SUNDAE CONE (INCL DRUMSTICK, ALL FLAVORS)	NA
13120792	Ice cream cone, chocolate, prepackaged	NA	NA
13120800	ICE CREAM SODA, NOT CHOCOLATE	NA
13120810	ICE CREAM SODA, CHOCOLATE	NA
13121000	ICE CREAM SUNDAE, TOPPING NS, W/ WHIPPED CREAM	NA
13121100	ICE CREAM SUNDAE, FRUIT TOPPING, W/ WHIPPED CREAM	NA
13121120	Banana split	NA	NA
13121200	ICE CREAM SUNDAE, PREPACKAGED, NOT CHOCOLATE	NA
13121300	ICE CREAM SUNDAE,CHOCOLATE TOPPING,W/ WHIPPED CREAM	NA
13121400	ICE CREAM SUNDAE, NOT FRUIT/ CHOC TOP,W/ WHIP CREAM	NA
13121500	ICE CREAM SUNDAE, FUDGE TOPPING, W/ CAKE	NA
13122100	ICE CREAM PIE, NO CRUST	NA
13122500	ICE CREAM PIE,COOKIE CRUST,FUDGE TOPPING,WHIP CREAM	NA
13126000	ICE CREAM, FRIED	NA
13127000	Dippin' Dots, flash frozen ice cream snacks, flavors other than chocolate	NA	NA
13127010	Dippin' Dots, flash frozen ice cream snacks, chocolate	NA	NA
13130100	LT ICE CREAM, NS FLAV ( ICE MILK)	NA
13130300	LIGHT ICE CREAM,NOT CHOCOLATE (FORMERLY ICE MILK)	NA
13130310	LIGHT ICE CREAM,CHOCOLATE (FORMERLY ICE MILK)	NA
13130320	LIGHT ICE CREAM, NO SUGAR ADDED, NS AS TO FLAVOR	NA
13130330	LIGHT ICE CREAM, NO SUGAR ADDED, NOT CHOCOLATE	NA
13130340	LIGHT ICE CREAM, NO SUGAR ADDED, CHOCOLATE	NA
13130590	LIGHT ICE CREAM,SOFT SERVE, NS FLAVOR (FORMERLY ICE MILK)	NA
13130600	LIGHT ICE CREAM,SOFT SERVE, NOT CHOC (FORMERLY ICE MILK)	NA
13130610	LIGHT ICE CREAM,SOFT SERVE CHOC (TASTEE FRZ, DAIRY QUEEN)	NA
13130620	LIGHT ICE CREAM,SOFT SERVE CONE,NOT CHOC (DAIRY QUEEN)	NA
13130630	LIGHT ICE CREAM,SOFT SERVE CONE, CHOC (FORMERLY ICE MILK)	NA
13130640	LIGHT ICE CREAM,SOFT SERVE CONE, NS FLAV(FORMERLY ICE MILK)	NA
13130700	LIGHT ICE CREAM, SOFT SERVE, BLENDED W/ CANDY OR COOKIES	NA
13135000	ICE CREAM SANDWICH, MADE W/ LIGHT ICE CREAM, NOT CHOCOLATE	NA
13135010	ICE CREAM SANDWICH, MADE W/ LIGHT CHOCOLATE ICE CREAM	NA
13136000	ICE CREAM SANDWICH, MADE W/ LIGHT, NO SUGAR ADDED ICE CREAM	NA
13140000	Light ice cream bar, vanilla	NA	NA
13140100	LIGHT ICE CREAM,BAR/STICK, CHOC-COATED (FORMERLY ICE MILK)	NA
13140110	LIGHT ICE CREAM,BAR, CHOC COVERED,W/NUTS (FORMERLY ICE MILK)	NA
13140115	Light ice cream bar, chocolate	NA	NA
13140450	LIGHT ICE CREAM,CONE, NFS (FORMERLY ICE MILK)	NA
13140500	LIGHT ICE CREAM,CONE, NOT CHOCOLATE (FORMERLY ICE MILK)	NA
13140550	LIGHT ICE CREAM,CONE, CHOCOLATE (FORMERLY ICE MILK)	NA
13140570	Light ice cream, no sugar added, cone, NS as to flavor	NA	NA
13140575	Light ice cream, no sugar added, cone, flavors other than chocolate	NA	NA
13140580	Light ice cream, no sugar added, cone, chocolate	NA	NA
13140600	LIGHT ICE CREAM,SUNDAE,SOFT SERVE,CHOC/FUDGE TOP (ICE MILK)	NA
13140630	LIGHT ICE CREAM,SUNDAE,SOFT SERVE,FRUIT TOPPING (ICE MILK)	NA
13140650	LIGHT ICE CREAM,SUNDAE,SOFT SERVE,NOT FRUIT/CHOC TOPPING	NA
13140660	LIGHT ICE CREAM,SUNDAE,CHOC / FUDGE TOP (W/O WHIP CREAM)	NA
13140670	LIGHT ICE CREAM,SUNDAE,FRUIT TOP (W/O WHIP CREAM)(ICE MILK)	NA
13140680	LIGHT ICE CREAM,SUNDAE,NO FRUIT/CHOC TOP (W/O WHIP CREAM)	NA
13140700	LIGHT ICE CREAM,CREAMSICLE OR DREAMSICLE (FORMERLY ICE MILK)	NA
13140710	Creamsicle, light	NA	NA
13140900	LIGHT ICE CREAM,FUDGESICLE (FORMERLY ICE MILK)	NA
13142000	MILK DESSERT BAR/STICK, FROZEN, W/ COCONUT	NA
13142100	Light ice cream cone, vanilla, prepackaged	NA	NA
13142110	Light ice cream cone, chocolate, prepackaged	NA	NA
13150000	SHERBET, ALL FLAVORS	NA
13160150	FAT FREE ICE CREAM, NO SUGAR ADD, CHOC	NA
13160160	FAT FREE ICE CREAM, NO SUGAR ADD, FLAVORS OTHER THAN CHOC	NA
13160400	FAT FREE ICE CREAM, FLAVORS OTHER THAN CHOC	NA
13160410	FAT FREE ICE CREAM, CHOC	NA
13160420	FAT FREE ICE CREAM, NS AS TO FLAVOR	NA
13161000	MILK DESSERT BAR, FROZEN, MADE FROM LOWFAT MILK	NA
13161500	MILK DESSERT SANDWICH BAR, FROZEN, DIETARY	NA
13161520	MILK DESSERT SANDWICH BAR,FRZ,W/LOW-CAL SWEET,LOFAT	NA
13161600	MILK DES BAR, FROZEN, LOFAT MILK&LO CAL SWEETENER	NA
13161630	LIGHT ICE CREAM,BAR/STICK, W/ LOW-CAL SWEETENER, CHOC COAT	NA
13170000	BAKED ALASKA	NA
13200110	PUDDING, NFS	NA
13210110	PUDDING, BREAD (INCLUDE W/ RAISINS)	NA
13210150	PUERTO RICAN BREAD PUDDING MADE W/ EVAP MILK & RUM	NA
13210160	DIPLOMAT PUDDING, P.R. (BUDIN DIPLOMATICO)	NA
13210180	PUDDING, MEXICAN BREAD (CAPIROTADA)	NA
13210190	PUDDING, MEXICAN BREAD (CAPIROTADA), LOWER FAT	NA
13210220	PUDDING, CHOCOLATE, NS AS TO FROM DRY MIX/RTE	NA
13210250	PUDDING, CHOC, LO CAL, W/ART SWTNER, NS DRY/RTE	NA
13210260	RICE FLOUR CREAM, P.R.STYLE (MANJAR BLANCO)	NA
13210270	CUSTARD, P.R. (MAICENA, NATILLA)	NA
13210280	PUDDING, NOT CHOC, NS FROM DRY OR RTE	NA
13210290	PUDDING, NOT CHOC, LO CAL, W/ART SWTNER, NS DRY MIX OR RTE	NA
13210300	CUSTARD	NA
13210350	FLAN	NA
13210370	Creme brulee	NA	NA
13210410	PUDDING, RICE	NA
13210450	PUDDING, RICE FLOUR, W/ NUTS (INDIAN DESSERT)	NA
13210500	PUDDING, TAPIOCA,MADE FROM HOME RECIPE, MADE W/ MILK	NA
13210520	PUDDING, TAPIOCA,MADE FROM DRY MIX,MADE W/ MILK	NA
13210530	PUDDING, TAPIOCA,CHOCOLATE,MADE W/ MILK	NA
13210610	PUDDING, COCONUT	NA
13210710	PUDDING, INDIAN (MILK, MOLASSES, CORNMEAL-BASED)	NA
13210750	PUDDING, PUMPKIN	NA
13210810	P.R. PUMPKIN PUDDING (FLAN DE CALABAZA)	NA
13210820	FRESH CORN CUSTARD, PUERTO RICAN STYLE	NA
13220110	PUDDING,NOT CHOCOLATE,PREPARED FROM DRY MIX,MILK ADDED	NA
13220120	PUDDING,CHOCOLATE,PREPARED FROM DRY MIX,MILK ADDED	NA
13220210	PUDDING,NOT CHOC,FROM DRY,LOW CAL,ARTIFICIAL SWEET,W/MILK	NA
13220220	PUDDING,CHOC,FROM DRY,LOW CAL,ARTIFICIAL SWEET,MILK ADDED	NA
13220230	PUDDING, RTE, CHOCOLATE, RED FAT	NA
13220235	PUDDING, RTE, CHOCOLATE, FAT FREE	NA
13220240	PUDDING, RTE, FLAVORS OTHER THAN CHOCOLATE, RED FAT	NA
13220245	PUDDING, RTE, FLAVORS OTHER THAN CHOCOLATE, FAT FREE	NA
13230110	PUDDING, RTE, FLAVORS OTHER THAN CHOCOLATE	NA
13230120	PUDDING, RTE, LOW CAL, W/ARTIFICIAL SWTNR, NOT CHOC	NA
13230130	PUDDING, RTE, CHOCOLATE	NA
13230140	PUDDING,RTE, LO CAL/ W ART SWTNER, CHOC	NA
13230200	PUDDING, RTE, CHOC & NON-CHOC FLAVORS COMBINED	NA
13230500	PUDDING, READY-TO-EAT, TAPIOCA	NA
13230510	PUDDING, READY-TO-EAT, TAPIOCA, FAT FREE	NA
13241000	PUDDING, W/ FRUIT & VANILLA WAFERS	NA
13250000	MOUSSE, CHOCOLATE	NA
13250100	MOUSSE, NOT CHOCOLATE	NA
13251000	CHANTILLY CREAM	NA
13252100	COCONUT CUSTARD, P.R. (FLAN DE COCO)	NA
13252200	MILK DESSERT OR MILK CANDY, P.R. (DULCE DE LECHE)	NA
13252500	BARFI/BURFI,INDIAN DESSERT,FROM MILK/CREAM/RICOTTA	NA
13252590	Trifle	NA	NA
13252600	TIRAMISU	NA
13310000	CUSTARD PUDDING, NOT CHOC, BABY, NS AS TO STR OR JR	NA
13311000	CUSTARD PUDDING, BABY, NOT CHOCOLATE, STRAINED	NA
13312000	CUSTARD PUDDING, BABY, NOT CHOCOLATE, JUNIOR	NA
13411000	WHITE SAUCE, MILK SAUCE	NA
13412000	MILK GRAVY, QUICK GRAVY	NA
14010000	CHEESE, NFS	NA
14010100	CHEESE,CHEDDAR/AMERICAN TYPE,NS NATURAL OR PROCESSED	NA
14100100	CHEESE, NATURAL, NFS	NA
14101010	CHEESE, BLUE OR ROQUEFORT	NA
14102010	CHEESE, BRICK	NA
14102110	CHEESE, BRICK, W/ SALAMI	NA
14103010	CHEESE, CAMEMBERT	NA
14103020	CHEESE, BRIE	NA
14104010	CHEESE, NATURAL, CHEDDAR OR AMERICAN TYPE	NA
14104015	CHEESE, NATURAL, CHEDDAR OR AMERICAN TYPE, REDUCED FAT	NA
14104020	CHEESE, CHEDDAR OR AMERICAN TYPE, DRY, GRATED	NA
14104100	Cheese, Cheddar	NA	NA
14104110	Cheese, Cheddar, reduced fat	NA	NA
14104115	Cheese, Cheddar, nonfat or fat free	NA	NA
14104200	CHEESE, COLBY	NA
14104250	CHEESE, COLBY JACK	NA
14104400	CHEESE, FETA (INCLUDE GOAT CHEESE)	NA
14104600	CHEESE, FONTINA	NA
14104700	CHEESE, GOAT	NA
14105010	CHEESE, GOUDA OR EDAM	NA
14105200	CHEESE, GRUYERE	NA
14106010	CHEESE, LIMBURGER	NA
14106200	CHEESE, MONTEREY	NA
14106500	CHEESE, MONTEREY, LOWFAT	NA
14107010	CHEESE, MOZZARELLA, NFS (INCLUDE PIZZA CHEESE)	NA
14107020	CHEESE, MOZZARELLA, WHOLE MILK	NA
14107030	CHEESE, MOZZARELLA, PART SKIM (INCL "LOWFAT")	NA
14107040	CHEESE, MOZZARELLA, LOW SODIUM	NA
14107060	CHEESE, MOZZARELLA, NONFAT OR FAT FREE	NA
14107200	CHEESE, MUENSTER	NA
14107250	CHEESE, MUENSTER, LOWFAT	NA
14108010	CHEESE, PARMESAN, DRY, GRATED (INCLUDE ROMANO)	NA
14108015	CHEESE, PARMESAN, DRY GRATED, REDUCED FAT	NA
14108020	CHEESE, PARMESAN, HARD (INCLUDE ROMANO)	NA
14108050	CHEESE, PARMESAN, LOW SODIUM	NA
14108060	PARMESAN CHEESE TOPPING, FAT FREE	NA
14108200	CHEESE, PORT DU SALUT	NA
14108400	CHEESE, PROVOLONE	NA
14108420	CHEESE, PROVOLONE, REDUCED FAT	NA
14109010	CHEESE, SWISS	NA
14109020	CHEESE, SWISS, LOW SODIUM	NA
14109030	CHEESE, SWISS, LOWFAT	NA
14109040	Cheese, Swiss, nonfat or fat free	NA	NA
14110010	CHEESE, CHEDDAR OR COLBY, LOW SODIUM	NA
14110030	CHEESE, CHEDDAR OR COLBY, LOWFAT	NA
14120010	CHEESE, MEXICAN BLEND	NA
14120020	CHEESE, MEXICAN BLEND, REDUCED FAT	NA
14131000	QUESO ANEJO (AGED MEXICAN CHEESE)	NA
14131500	QUESO ASADERO (INCL OAXACAN-STYLE STRING CHEESE)	NA
14132000	QUESO CHIHUAHUA (INCL MENNONITE CHEESE)	NA
14133000	QUESO FRESCO (HISPANIC-STYLE FARMER CHEESE)	NA
14134000	Queso cotija	NA	NA
14200100	CHEESE, COTTAGE, NFS	NA
14201010	CHEESE, COTTAGE, CREAMED	NA
14201200	COTTAGE CHEESE, FARMER'S	NA
14201500	CHEESE, RICOTTA	NA
14202010	CHEESE, COTTAGE, W/ FRUIT	NA
14202020	CHEESE, COTTAGE, W/ VEGETABLES	NA
14203010	CHEESE, COTTAGE, DRY CURD	NA
14203020	CHEESE, COTTAGE, SALTED, DRY CURD	NA
14203510	P.R. WHITE CHEESE (QUESO DEL PAIS, BLANCO)	NA
14204010	CHEESE, COTTAGE, LOWFAT	NA
14204020	CHEESE, COTTAGE, LOWFAT, W/ FRUIT	NA
14204030	CHEESE, COTTAGE, LOWFAT, W/ VEGETABLES	NA
14206010	CHEESE, COTTAGE, LOWFAT, LOW SODIUM	NA
14207010	CHEESE, COTTAGE, LOWFAT, LACTOSE REDUCED	NA
14301010	CHEESE, CREAM	NA
14301100	Cream cheese, regular, flavored	NA	NA
14303010	CHEESE, CREAM, LIGHT/LITE (FORMERLY CALLED CR CHEESE LOWFAT)	NA
14410100	CHEESE, PROCESSED, AMERICAN & SWISS BLENDS	NA
14410110	Cheese, American	NA	NA
14410120	Cheese, American, reduced fat	NA	NA
14410130	Cheese, American, nonfat or fat free	NA	NA
14410200	CHEESE, PROCESSED, AMERICAN/CHEDDAR TYPE	NA
14410210	CHEESE, PROCESSED, AMERICAN/CHEDDAR, LOW SODIUM	NA
14410300	CHEESE, PROCESSED, AMERICAN/CHEDDAR TYPE, LOWFAT	NA
14410330	CHEESE, PROC CHEESE PRODUCT, AMER/CHED, RED FAT	NA
14410350	CHEESE, PROCESSED, AMERICAN/CHEDDAR TYPE, NONFAT	NA
14410380	CHEESE, PROCESSED CREAM CHEESE PRODUCT, NONFAT	NA
14410400	CHEESE, PROCESSED, SWISS	NA
14410420	CHEESE, PROCESSED, SWISS, LOW FAT	NA
14410500	CHEESE, PROCESSED, CHEESE FOOD	NA
14410600	CHEESE, PROCESSED, W/VEGETABLES(INCL PEPPER CHEESE)	NA
14410620	CHEESE, PROCESSED, W/ WINE	NA
14420000	CHEESE SPREAD, NFS	NA
14420100	CHEESE SPREAD, AMERICAN OR CHEDDAR CHEESE BASE	NA
14420160	CHEESE SPREAD, SWISS CHEESE BASE	NA
14420200	CHEESE SPRD, CREAM CHEESE, REG	NA
14420210	CHEESE SPREAD, CREAM CHEESE, LIGHT OR LITE	NA
14420300	CHEESE SPREAD, PRESSURIZED CAN	NA
14502000	Imitation cheese	NA	NA
14502010	IMITATION CHEESE, AMERICAN OR CHEDDAR TYPE	NA
14502040	IMITATION CHEESE, AMER/CHEDDAR TYPE, LOW CHOLESTERO	NA
14504010	IMITATION MOZZARELLA CHEESE (INCL PIZZA MATE)	NA
14610200	COTTAGE CHEESE, W/ GELATIN DESSERT	NA
14610210	COTTAGE CHEESE, W/ GELATIN DESSERT & FRUIT	NA
14610250	COTTAGE CHEESE W/ GELATIN DESSERT & VEGETABLES	NA
14610520	CHEESE W/ NUTS (INCL CHEESE BALL)	NA
14620100	DIP, CREAM CHEESE BASE	NA
14620110	Artichoke dip	NA	NA
14620115	Spinach and artichoke dip	NA	NA
14620120	SHRIMP DIP, CREAM CHEESE BASE (INCL CLAM DIP)	NA
14620130	Seafood dip	NA	NA
14620150	DIP, CHEESE W/ CHILI PEPPER (CHILI CON QUESO)	NA
14620200	DIP, CHEESE BASE OTHER THAN CREAM CHEESE	NA
14620300	TOPPING FROM CHEESE PIZZA	NA
14620310	TOPPING FROM VEGETABLE PIZZA	NA
14620320	TOPPING FROM MEAT PIZZA	NA
14620330	TOPPING FROM MEAT AND VEGETABLE PIZZA	NA
14630100	CHEESE FONDUE	NA
14630200	CHEESE SOUFFLE	NA
14630300	WELSH RAREBIT	NA
14640000	CHEESE SANDWICH	NA
14640002	Cheese sandwich, American cheese, on white bread, no spread	NA	NA
14640004	Cheese sandwich, American cheese, on wheat bread, no spread	NA	NA
14640006	Cheese sandwich, American cheese, on whole wheat bread, no spread	NA	NA
14640008	Cheese sandwich, Cheddar cheese, on white bread, no spread	NA	NA
14640010	Cheese sandwich, Cheddar cheese, on wheat bread, no spread	NA	NA
14640012	Cheese sandwich, Cheddar cheese, on whole wheat bread, no spread	NA	NA
14640014	Cheese sandwich, reduced fat American cheese, on white bread, no spread	NA	NA
14640016	Cheese sandwich, reduced fat American cheese, on wheat bread, no spread	NA	NA
14640018	Cheese sandwich, reduced fat American cheese, on whole wheat bread, no spread	NA	NA
14640020	Cheese sandwich, reduced fat Cheddar cheese, on white bread, no spread	NA	NA
14640022	Cheese sandwich, reduced fat Cheddar cheese, on wheat bread, no spread	NA	NA
14640024	Cheese sandwich, reduced fat Cheddar cheese, on whole wheat bread, no spread	NA	NA
14640026	Cheese sandwich, American cheese, on white bread, with mayonnaise	NA	NA
14640028	Cheese sandwich, American cheese, on wheat bread, with mayonnaise	NA	NA
14640030	Cheese sandwich, American cheese, on whole wheat bread, with mayonnaise	NA	NA
14640032	Cheese sandwich, Cheddar cheese, on white bread, with mayonnaise	NA	NA
14640034	Cheese sandwich, Cheddar cheese, on wheat bread, with mayonnaise	NA	NA
14640036	Cheese sandwich, Cheddar cheese, on whole wheat bread, with mayonnaise	NA	NA
14640038	Cheese sandwich, reduced fat American cheese, on white bread, with mayonnaise	NA	NA
14640040	Cheese sandwich, reduced fat American cheese,, on wheat bread, with mayonnaise	NA	NA
14640042	Cheese sandwich, reduced fat American cheese, on whole wheat bread, with mayonnaise	NA	NA
14640044	Cheese sandwich, reduced fat Cheddar cheese, on white bread, with mayonnaise	NA	NA
14640046	Cheese sandwich, reduced fat Cheddar cheese, on wheat bread, with mayonnaise	NA	NA
14640048	Cheese sandwich, reduced fat Cheddar cheese, on whole wheat bread, with mayonnaise	NA	NA
14640050	Cheese sandwich, American cheese, on white bread, with butter	NA	NA
14640052	Cheese sandwich, American cheese, on wheat bread, with butter	NA	NA
14640054	Cheese sandwich, American cheese, on whole wheat bread, with butter	NA	NA
14640056	Cheese sandwich, Cheddar cheese, on white bread, with butter	NA	NA
14640058	Cheese sandwich, Cheddar cheese, on wheat bread, with butter	NA	NA
14640060	Cheese sandwich, Cheddar cheese, on whole wheat bread, with butter	NA	NA
14640062	Cheese sandwich, reduced fat American cheese, on white bread, with butter	NA	NA
14640064	Cheese sandwich, reduced fat American cheese, on wheat bread, with butter	NA	NA
14640066	Cheese sandwich, reduced fat American cheese, on whole wheat bread, with butter	NA	NA
14640068	Cheese sandwich, reduced fat Cheddar cheese, on white bread, with butter	NA	NA
14640070	Cheese sandwich, reduced fat Cheddar cheese, on wheat bread, with butter	NA	NA
14640072	Cheese sandwich, reduced fat Cheddar cheese, on whole wheat bread, with butter	NA	NA
14640100	CHEESE SANDWICH, GRILLED	NA
14640105	Grilled cheese sandwich, American cheese, on white bread	NA	NA
14640110	Grilled cheese sandwich, American cheese, on wheat bread	NA	NA
14640115	Grilled cheese sandwich, American cheese, on whole wheat bread	NA	NA
14640125	Grilled cheese sandwich, Cheddar cheese, on white bread	NA	NA
14640130	Grilled cheese sandwich, Cheddar cheese, on wheat bread	NA	NA
14640135	Grilled cheese sandwich, Cheddar cheese, on whole wheat bread	NA	NA
14640155	Grilled cheese sandwich, reduced fat American cheese, on white bread	NA	NA
14640160	Grilled cheese sandwich, reduced fat American cheese, on wheat bread	NA	NA
14640165	Grilled cheese sandwich, reduced fat American cheese, on whole wheat bread	NA	NA
14640185	Grilled cheese sandwich, reduced fat Cheddar cheese, on white bread	NA	NA
14640190	Grilled cheese sandwich, reduced fat Cheddar cheese, on wheat bread	NA	NA
14640195	Grilled cheese sandwich, reduced fat Cheddar cheese, on whole wheat bread	NA	NA
14640200	CHEESE SANDWICH, HOAGIE	NA
14640300	CHEESE SPREAD SANDWICH	NA
14650100	CHEESE SAUCE	NA
14650150	CHEESE SAUCE MADE W/ LOWFAT CHEESE	NA
14650160	ALFREDO SAUCE	NA
14650165	Alfredo sauce with added vegetables	NA	NA
14650170	Alfredo sauce with meat	NA	NA
14650175	Alfredo sauce with meat and added vegetables	NA	NA
14650180	Alfredo sauce with poultry	NA	NA
14650185	Alfredo sauce with poultry and added vegetables	NA	NA
14650190	Alfredo sauce with seafood	NA	NA
14650195	Alfredo sauce with seafood and added vegetables	NA	NA
14660200	CHEESE, NUGGETS, FRIED (INCL BANQUET BRAND)	NA
14670000	Mozzarella cheese, tomato, and basil, with oil and vinegar dressing	NA	NA
14710100	CHEDDAR CHEESE SOUP	NA
14710110	CHEDDAR CHEESE SOUP, CANNED, UNDILUTED	NA
14710200	BEER SOUP, MADE W/ MILK	NA
20000000	MEAT, NFS	NA
20000070	MEAT, BABY, NS AS TO TYPE, NS AS TO STR OR JR	NA
20000090	MEAT STICKS, BABY, NS AS TO TYPE OF MEAT	NA
20000200	GROUND MEAT,NFS	NA
21000100	BEEF, NS AS TO CUT, COOKED, NS AS TO FAT	NA
21000110	BEEF, NS AS TO CUT, COOKED, LEAN & FAT	NA
21000120	BEEF, NS AS TO CUT, COOKED, LEAN ONLY	NA
21001000	STEAK, NS AS TO TYPE OF MEAT, COOKED, NS AS TO FAT	NA
21001010	STEAK, NS AS TO TYPE OF MEAT, COOKED, LEAN & FAT	NA
21001020	STEAK, NS AS TO TYPE OF MEAT, COOKED, LEAN ONLY	NA
21002000	BEEF, PICKLED	NA
21003000	BEEF, NS AS TO CUT, FRIED, NS AS TO FAT EATEN	NA
21101000	BEEF STEAK, NS AS TO COOKING METHOD, NS AS TO FAT	NA
21101010	BEEF STEAK, NS AS TO COOKING METHOD, LEAN & FAT	NA
21101020	BEEF STEAK, NS AS TO COOKING METHOD, LEAN ONLY	NA
21101110	BEEF STEAK, BROILED OR BAKED, NS AS TO FAT	NA
21101120	BEEF STEAK, BROILED OR BAKED, LEAN & FAT	NA
21101130	BEEF STEAK, BROILED OR BAKED, LEAN ONLY	NA
21102110	BEEF STEAK, FRIED, NS AS TO FAT	NA
21102120	BEEF STEAK, FRIED, LEAN & FAT	NA
21102130	BEEF STEAK, FRIED, LEAN ONLY	NA
21103110	BEEF STEAK,BREADED/FLOURED,BAKED/FRIED,NS AS TO FAT	NA
21103120	BEEF STEAK, BREADED/FLOURED,BAKED/FRIED, LEAN & FAT	NA
21103130	BEEF STEAK, BREADED/FLOURED, BAKED/FRIED, LEAN ONLY	NA
21104110	BEEF STEAK, BATTERED, FRIED, NS AS TO FAT	NA
21104120	BEEF STEAK, BATTERED, FRIED, LEAN & FAT	NA
21104130	BEEF STEAK, BATTERED, FRIED, LEAN ONLY	NA
21105110	BEEF STEAK, BRAISED, NS AS TO FAT	NA
21105120	BEEF STEAK, BRAISED, LEAN & FAT	NA
21105130	BEEF STEAK, BRAISED, LEAN ONLY	NA
21301000	BEEF, OXTAILS, COOKED	NA
21302000	BEEF, NECK BONES, COOKED	NA
21304000	BEEF, SHORTRIBS, COOKED, NS AS TO FAT	NA
21304110	BEEF, SHORTRIBS, COOKED, LEAN & FAT	NA
21304120	BEEF, SHORTRIBS, COOKED, LEAN ONLY	NA
21304200	BEEF, SHORTRIBS, BBQ, W/ SAUCE, NS AS TO FAT	NA
21304210	BEEF, SHORTRIBS, BBQ, W/ SAUCE, LEAN & FAT	NA
21304220	BEEF, SHORTRIBS, BBQ, W/ SAUCE, LEAN ONLY	NA
21305000	BEEF, COW HEAD, COOKED	NA
21401000	BEEF, ROAST, ROASTED, NS AS TO FAT	NA
21401110	BEEF, ROAST, ROASTED, LEAN & FAT	NA
21401120	BEEF, ROAST, ROASTED, LEAN ONLY	NA
21401400	BEEF, ROAST, CANNED	NA
21407000	BEEF, POT ROAST, BRAISED OR BOILED, NS AS TO FAT	NA
21407110	BEEF, POT ROAST, BRAISED OR BOILED, LEAN & FAT	NA
21407120	BEEF, POT ROAST, BRAISED OR BOILED, LEAN ONLY	NA
21410000	BEEF, STEW MEAT, COOKED, NS AS TO FAT	NA
21410110	BEEF, STEW MEAT, COOKED, LEAN & FAT	NA
21410120	BEEF, STEW MEAT, COOKED, LEAN ONLY	NA
21416000	CORNED BEEF, COOKED, NS AS TO FAT	NA
21416110	CORNED BEEF, COOKED, LEAN & FAT	NA
21416120	CORNED BEEF, COOKED, LEAN ONLY	NA
21416150	CORNED BEEF, CANNED, READY TO EAT	NA
21417100	BEEF BRISKET, COOKED, NS AS TO FAT	NA
21417110	BEEF BRISKET, COOKED, LEAN & FAT	NA
21417120	BEEF BRISKET, COOKED, LEAN ONLY	NA
21420100	BEEF, SANDWICH STEAK (FLAKED,FORMED, THINLY SLICED)	NA
21500000	GROUND BEEF, RAW	NA
21500100	GROUND BEEF OR PATTY, NS AS TO %LEAN	NA
21500200	GROUND BEEF OR PATTY, BREADED, COOKED	NA
21500300	GROUND BEEF PATTY, COOKED (FOR FAST FOOD SANDWICHES)	NA
21500310	Ground beef patty, cooked	NA	NA
21501000	GROUND BEEF, LESS THAN 80% LEAN, COOKED	NA
21501200	GROUND BEEF, 80% - 84% LEAN, COOKED	NA
21501300	GROUND BEEF, 85% - 89% LEAN, COOKED	NA
21501350	GROUND BEEF, 90% - 94% LEAN, COOKED	NA
21501360	GROUND BEEF, 95% OR MORE LEAN, COOKED	NA
21540100	GROUND BEEF W/ TEXTURED VEGETABLE PROTEIN, COOKED	NA
21601000	BEEF, BACON, COOKED	NA
21601010	Beef, bacon, reduced sodium, cooked	NA	NA
21601500	BEEF BACON, FORMED, LEAN MEAT ADDED (INCL SIZZLEAN)	NA
21602000	BEEF, DRIED, CHIPPED, UNCOOKED	NA
21602010	BEEF, DRIED, CHIPPED, COOKED IN FAT	NA
21602100	BEEF JERKY	NA
21603000	BEEF, PASTRAMI (BEEF, SMOKED, SPICED)	NA
21701000	BEEF, BABY, NS AS TO STRAINED OR JUNIOR	NA
21701010	BEEF, BABY, STRAINED	NA
21701020	BEEF, BABY, JUNIOR	NA
22000100	PORK, NS AS TO CUT, COOKED, NS AS TO FAT EATEN	NA
22000110	PORK, NS AS TO CUT, COOKED, LEAN & FAT EATEN	NA
22000120	PORK, NS AS TO CUT, COOKED, LEAN ONLY EATEN	NA
22000200	PORK, NS AS TO CUT, FRIED, NS AS TO FAT EATEN	NA
22000210	PORK, NS AS TO CUT, FRIED, LEAN & FAT EATEN	NA
22000220	PORK, NS AS TO CUT, FRIED, LEAN ONLY EATEN	NA
22000300	PORK, NS AS TO CUT, BREADED, FRIED, NS AS TO FAT	NA
22000310	PORK, NS AS TO CUT, BREADED, FRIED, FAT EATEN	NA
22000320	PORK, NS AS TO CUT, BREADED, FRIED, LEAN ONLY	NA
22001000	PORK, PICKLED, NS AS TO CUT	NA
22002000	PORK, GROUND OR PATTY, COOKED	NA
22002100	PORK, GROUND, GROUND OR PATTY, BREADED, COOKED	NA
22002800	PORK JERKY	NA
22101000	PORK CHOP, NS AS TO COOKING METHOD, NS AS TO FAT	NA
22101010	PORK CHOP, NS AS TO COOKING METHOD, LEAN & FAT	NA
22101020	PORK CHOP, NS AS TO COOKING METHOD, LEAN ONLY	NA
22101100	PORK CHOP, BROILED OR BAKED, NS AS TO FAT	NA
22101110	PORK CHOP, BROILED OR BAKED, LEAN & FAT	NA
22101120	PORK CHOP, BROILED OR BAKED, LEAN ONLY	NA
22101130	PORK CHOP, BREADED, BROILED OR BAKED, NS AS TO FAT	NA
22101140	PORK CHOP, BREADED, BROILED OR BAKED, LEAN & FAT	NA
22101150	PORK CHOP, BREADED, BROILED OR BAKED, LEAN ONLY	NA
22101200	PORK CHOP, FRIED, NS AS TO FAT	NA
22101210	PORK CHOP, FRIED, LEAN & FAT	NA
22101220	PORK CHOP, FRIED, LEAN ONLY	NA
22101300	PORK CHOP, BREADED, FRIED, NS AS TO FAT	NA
22101310	PORK CHOP, BREADED, FRIED, LEAN & FAT	NA
22101320	PORK CHOP, BREADED, FRIED, LEAN ONLY	NA
22101400	PORK CHOP, BATTERED, FRIED, NS AS TO FAT	NA
22101410	PORK CHOP, BATTERED, FRIED, LEAN & FAT	NA
22101420	PORK CHOP, BATTERED, FRIED, LEAN ONLY	NA
22101500	PORK CHOP, STEWED, NS AS TO FAT EATEN	NA
22101510	PORK CHOP, STEWED, LEAN & FAT EATEN	NA
22101520	PORK CHOP, STEWED, LEAN ONLY EATEN	NA
22107000	PORK CHOP, SMOKED OR CURED, COOKED, NS AS TO FAT	NA
22107010	PORK CHOP, SMOKED OR CURED, COOKED, LEAN & FAT	NA
22107020	PORK CHOP, SMOKED OR CURED, COOKED, LEAN ONLY	NA
22201000	PORK STEAK, NS AS TO COOKING METHOD, NS AS TO FAT	NA
22201010	PORK STEAK, NS AS TO COOKING METHOD, LEAN & FAT	NA
22201020	PORK STEAK, NS AS TO COOKING METHOD, LEAN ONLY	NA
22201050	PORK STEAK OR CUTLET, BATTERED, FRIED, NS AS TO FAT	NA
22201060	PORK STEAK OR CUTLET, BATTERED, FRIED, LEAN & FAT	NA
22201070	PORK STEAK OR CUTLET, BATTERED, FRIED, LEAN ONLY	NA
22201100	PORK STEAK OR CUTLET, BROILED OR BAKD, NS AS TO FAT	NA
22201110	PORK STEAK OR CUTLET, BROILED OR BAKED, LEAN & FAT	NA
22201120	PORK STEAK OR CUTLET, BROILED OR BAKED, LEAN ONLY	NA
22201200	PORK STEAK OR CUTLET, FRIED, NS AS TO FAT	NA
22201210	PORK STEAK OR CUTLET, FRIED, LEAN & FAT	NA
22201220	PORK STEAK OR CUTLET, FRIED, LEAN ONLY	NA
22201300	PORK CUTLET, BREADED, BROILED/BAKED, NS AS TO FAT	NA
22201310	PORK CUTLET, BREADED, BROILED/BAKED, LEAN & FAT	NA
22201320	PORK CUTLET, BREADED, BROILED/BAKED, LEAN ONLY	NA
22201400	PORK STEAK OR CUTLET, BREADED, FRIED, NS AS TO FAT	NA
22201410	PORK STEAK OR CUTLET, BREADED, FRIED, LEAN & FAT	NA
22201420	PORK STEAK OR CUTLET, BREADED, FRIED, LEAN ONLY	NA
22210300	PORK, TENDERLOIN, COOKED, NS AS TO METHOD	NA
22210310	PORK, TENDERLOIN, BREADED, FRIED	NA
22210350	PORK, TENDERLOIN, BRAISED	NA
22210400	PORK, TENDERLOIN, BAKED	NA
22210450	PORK, TENDERLOIN, BATTERED, FRIED	NA
22300120	HAM, FRIED, NS AS TO FAT	NA
22300130	HAM, FRIED, LEAN & FAT	NA
22300140	HAM, FRIED, LEAN ONLY	NA
22300150	HAM, BREADED, FRIED, NS AS TO FAT	NA
22300160	HAM, BREADED, FRIED, LEAN & FAT	NA
22300170	HAM, BREADED, FRIED, LEAN ONLY	NA
22301000	HAM, FRESH, COOKED, NS AS TO FAT	NA
22301110	HAM, FRESH, COOKED, LEAN & FAT	NA
22301120	HAM, FRESH, COOKED, LEAN ONLY	NA
22311000	HAM, SMOKED OR CURED, COOKED, NS AS TO FAT	NA
22311010	HAM, SMOKED OR CURED, COOKED, LEAN & FAT	NA
22311020	HAM, SMOKED OR CURED, COOKED, LEAN ONLY	NA
22311200	HAM, SMOKED OR CURED, LOW NA, NS AS TO FAT	NA
22311210	HAM, SMOKED OR CURED, LOW NA, LEAN & FAT	NA
22311220	HAM, SMOKED OR CURED, LOW NA, LEAN ONLY	NA
22311450	HAM, PROSCIUTTO	NA
22311500	HAM, SMOKED OR CURED, CANNED, NS AS TO FAT EATEN	NA
22311510	HAM, SMOKED OR CURED, CANNED, LEAN & FAT EATEN	NA
22311520	HAM, SMOKED OR CURED, CANNED, LEAN ONLY EATEN	NA
22321110	HAM, SMOKED OR CURED, GROUND PATTY	NA
22400100	PORK ROAST, NS AS TO CUT, NS AS TO FAT	NA
22400110	PORK ROAST, NS AS TO CUT, COOKED, LEAN & FAT	NA
22400120	PORK ROAST, NS AS TO CUT, COOKED, LEAN ONLY	NA
22401000	PORK ROAST, LOIN, COOKED, NS AS TO FAT	NA
22401010	PORK ROAST, LOIN, COOKED, LEAN & FAT	NA
22401020	PORK ROAST, LOIN, COOKED, LEAN ONLY	NA
22402510	FRIED PORK CHUNKS, P.R. (CARNE DE CERDO FRITA)	NA
22411000	PORK ROAST, SHOULDER, COOKED, NS AS TO FAT	NA
22411010	PORK ROAST, SHOULDER, COOKED, LEAN & FAT	NA
22411020	PORK ROAST, SHOULDER, COOKED, LEAN ONLY	NA
22421000	PORK ROAST, SMOKED OR CURED, COOKED, NS AS TO FAT	NA
22421010	PORK ROAST, SMOKED OR CURED, COOKED, LEAN & FAT	NA
22421020	PORK ROAST, SMOKED OR CURED, COOKED, LEAN ONLY	NA
22431000	PORK ROLL, CURED, FRIED	NA
22501010	BACON, CANADIAN, COOKED	NA
22600100	BACON, NS AS TO TYPE OF MEAT, COOKED	NA
22600110	Bacon, NS as to type of meat, reduced sodium, cooked	NA	NA
22600200	PORK BACON, NS AS TO FRESH/SMOKED/CURED, COOKED	NA
22600210	Pork bacon, NS as to fresh, smoked or cured, reduced sodium, cooked	NA	NA
22601000	PORK BACON, SMOKED OR CURED, COOKED	NA
22601040	BACON OR SIDE PORK, FRESH, COOKED	NA
22602010	PORK BACON, SMOKED OR CURED, LOWER SODIUM	NA
22605010	BACON, FORMED, LEAN MEAT ADDED, COOKED	NA
22621000	SALT PORK, COOKED	NA
22621100	FAT BACK, COOKED (INCLUDE HOG JOWL)	NA
22701000	PORK, SPARERIBS, COOKED, NS AS TO FAT EATEN	NA
22701010	PORK, SPARERIBS, COOKED, LEAN & FAT	NA
22701020	PORK, SPARERIBS, COOKED, LEAN ONLY	NA
22701030	PORK, SPARERIBS, BBQ, W/ SAUCE, NS FAT EATEN	NA
22701040	PORK, SPARERIBS, BBQ, W/ SAUCE, LEAN & FAT EATEN	NA
22701050	PORK, SPARERIBS, BBQ, W/ SAUCE, LEAN ONLY EATEN	NA
22704010	PORK, CRACKLINGS, COOKED	NA
22705010	PORK, EARS, TAIL, HEAD, SNOUT, MISC PARTS, COOKED	NA
22706010	PORK, NECK BONES, COOKED	NA
22707010	PORK, PIG'S FEET, COOKED	NA
22707020	PORK, PIG'S FEET, PICKLED	NA
22708010	PORK, PIG'S HOCKS, COOKED	NA
22709010	PORK SKIN, RINDS, DEEP-FRIED	NA
22709110	PORK SKIN, BOILED	NA
22810010	HAM, BABY, STRAINED	NA
22820000	MEAT STICK, BABY FOOD	NA
23000100	LAMB, NS AS TO CUT, COOKED	NA
23101000	LAMB CHOP, COOKED, NS AS TO CUT & FAT	NA
23101010	LAMB CHOP, NS AS TO CUT, COOKED, LEAN & FAT	NA
23101020	LAMB CHOP, NS AS TO CUT, COOKED, LEAN ONLY	NA
23104000	LAMB, LOIN CHOP, COOKED, NS AS TO FAT	NA
23104010	LAMB, LOIN CHOP, COOKED, LEAN & FAT	NA
23104020	LAMB, LOIN CHOP, COOKED, LEAN ONLY	NA
23107000	LAMB, SHOULDER CHOP, COOKED, NS AS TO FAT	NA
23107010	LAMB, SHOULDER CHOP, COOKED, LEAN & FAT	NA
23107020	LAMB, SHOULDER CHOP, COOKED, LEAN ONLY	NA
23108000	LAMB, SHOULDER, COOKED, NS AS TO FAT	NA
23108010	LAMB, SHOULDER, COOKED, LEAN & FAT	NA
23108020	LAMB, SHOULDER, COOKED, LEAN ONLY	NA
23110000	LAMB, RIBS, COOKED, LEAN ONLY	NA
23110010	LAMB, RIBS, COOKED, NS AS TO FAT	NA
23110050	LAMB, RIBS, COOKED, LEAN & FAT	NA
23111010	LAMB HOCKS, COOKED	NA
23120100	LAMB, ROAST, COOKED, NS AS TO FAT EATEN	NA
23120110	LAMB, ROAST, COOKED, LEAN & FAT EATEN	NA
23120120	LAMB, ROAST, COOKED, LEAN ONLY EATEN	NA
23132000	LAMB, GROUND OR PATTY, COOKED	NA
23150100	GOAT, BOILED	NA
23150200	GOAT, FRIED	NA
23150250	GOAT, BAKED	NA
23150270	GOAT HEAD, COOKED	NA
23150300	GOAT RIBS, COOKED	NA
23200100	VEAL, COOKED, NS AS TO CUT & FAT	NA
23200110	VEAL, NS AS TO CUT, COOKED, LEAN & FAT	NA
23200120	VEAL, NS AS TO CUT, COOKED, LEAN ONLY	NA
23201010	VEAL CHOP, NS AS TO COOKING METHOD, NS AS TO FAT	NA
23201020	VEAL CHOP, NS AS TO COOKING METHOD, LEAN & FAT	NA
23201030	VEAL CHOP, NS AS TO COOKING METHOD, LEAN ONLY	NA
23203010	VEAL CHOP, FRIED, NS AS TO FAT	NA
23203020	VEAL CHOP, FRIED, LEAN & FAT	NA
23203030	VEAL CHOP, FRIED, LEAN ONLY	NA
23203100	VEAL CHOP, BROILED, NS AS TO FAT	NA
23203110	VEAL CHOP, BROILED, LEAN & FAT	NA
23203120	VEAL CHOP, BROILED, LEAN ONLY	NA
23204010	VEAL CUTLET, NS AS TO COOKING METHOD, NS AS TO FAT	NA
23204020	VEAL CUTLET, NS AS TO COOKING METHOD, LEAN & FAT	NA
23204030	VEAL CUTLET, NS AS TO COOKING METHOD, LEAN ONLY	NA
23204200	VEAL CUTLET OR STEAK, BROILED, NS AS TO FAT	NA
23204210	VEAL CUTLET OR STEAK, BROILED, LEAN & FAT	NA
23204220	VEAL CUTLET OR STEAK, BROILED, LEAN ONLY	NA
23205010	VEAL CUTLET OR STEAK, FRIED, NS AS TO FAT	NA
23205020	VEAL CUTLET OR STEAK, FRIED, LEAN & FAT	NA
23205030	VEAL CUTLET OR STEAK, FRIED, LEAN ONLY	NA
23210010	VEAL, ROASTED, NS AS TO FAT	NA
23210020	VEAL, ROASTED, LEAN & FAT	NA
23210030	VEAL, ROASTED, LEAN ONLY	NA
23220010	VEAL, GROUND OR PATTY, COOKED	NA
23220020	MOCK CHICKEN LEGS, COOKED	NA
23220030	VEAL PATTY, BREADED, COOKED	NA
23310000	RABBIT, NS AS TO DOMESTIC OR WILD, COOKED	NA
23311100	RABBIT, DOMESTIC, NS AS TO COOKING METHOD	NA
23311120	RABBIT, NS AS TO DOMESTIC OR WILD, BREADED, FRIED	NA
23311200	RABBIT, WILD, COOKED	NA
23321000	VENISON/DEER, NFS	NA
23321050	VENISON/DEER, CURED	NA
23321100	VENISON/DEER, ROASTED (INCLUDE ROAST ANTELOPE)	NA
23321200	VENISON/DEER STEAK, COOKED, NS AS TO METHOD	NA
23321250	VENISON/DEER STEAK, BREADED OR FLOURED, COOKED	NA
23321900	VENISON/DEER JERKY	NA
23322100	DEER BOLOGNA	NA
23322300	DEER CHOP, COOKED (INCLUDE VENISON CHOP)	NA
23322350	VENISON/DEER RIBS, COOKED	NA
23322400	VENISON/DEER, STEWED	NA
23323100	MOOSE, COOKED	NA
23323500	BEAR, COOKED	NA
23324100	CARIBOU, COOKED	NA
23326100	BISON, COOKED	NA
23331100	GROUND HOG, COOKED	NA
23332100	OPOSSUM, COOKED	NA
23333100	SQUIRREL, COOKED	NA
23334100	BEAVER, COOKED	NA
23335100	RACCOON, COOKED	NA
23340100	ARMADILLO, COOKED	NA
23345100	WILD PIG, SMOKED	NA
23350100	OSTRICH, COOKED	NA
23410010	LAMB, BABY, STRAINED	NA
23420010	VEAL, BABY, STRAINED	NA
24100000	CHICKEN, NS AS TO PART, NS METHOD, SKIN	NA
24100010	CHICKEN, NS AS TO PART, NS METHOD, W/ SKIN	NA
24100020	CHICKEN, NS AS TO PART, NS METHOD, W/O SKIN	NA
24102000	CHICKEN, NS PART, ROASTED/BROILED/BAKED, NS SKIN	NA
24102010	CHICKEN, NS PART, ROASTED/BROILED/BAKED, W/ SKIN	NA
24102020	CHICKEN, NS PART, ROASTED/BROILED/BAKED, W/O SKIN	NA
24102050	Chicken, NS as to part, rotisserie, NS as to skin eaten	NA	NA
24102060	Chicken, NS as to part, rotisserie, skin eaten	NA	NA
24102070	Chicken, NS as to part, rotisserie, skin not eaten	NA	NA
24103000	CHICKEN, STEWED, NS PART, NS SKIN	NA
24103010	CHICKEN, STEWED, NS PART, W/ SKIN	NA
24103020	CHICKEN, STEWED, NS PART, W/O SKIN	NA
24103050	Chicken, NS as to part, grilled without sauce, NS as to skin eaten	NA	NA
24103055	Chicken, NS as to part, grilled without sauce, skin eaten	NA	NA
24103060	Chicken, NS as to part, grilled without sauce, skin not eaten	NA	NA
24103070	Chicken, NS as to part, grilled with sauce, NS as to skin eaten	NA	NA
24103075	Chicken, NS as to part, grilled with sauce, skin eaten	NA	NA
24103080	Chicken, NS as to part, grilled with sauce, skin not eaten	NA	NA
24104000	CHICKEN, FRIED, NO COATING, NS PART, NS SKIN	NA
24104001	Chicken, NS as to part, fried, no coating, NS as to skin eaten, fat not added in cooking	NA	NA
24104010	CHICKEN, FRIED, NO COATING, NS PART, W/ SKIN	NA
24104011	Chicken, NS as to part, fried, no coating, skin eaten, fat not added in cooking	NA	NA
24104020	CHICKEN, FRIED, NO COATING, NS PART, W/O SKIN	NA
24104021	Chicken, NS as to part, fried, no coating, skin not eaten, fat not added in cooking	NA	NA
24104049	Chicken, NS as to part, sauteed, skin eaten	NA	NA
24104051	Chicken, NS as to part, sauteed, skin not eaten	NA	NA
24107000	CHICKEN, COATED, BKD/FRD, PPD W/ SKIN, NS SKIN EATEN	NA
24107001	Chicken, NS as to part, coated, baked or fried, prepared with skin, NS as to skin/coating eaten, fat not added in cooking	NA	NA
24107010	CHICKEN, COATED, BKD/FRD, PPD W/ SKIN, SKIN EATEN	NA
24107011	Chicken, NS as to part, coated, baked or fried, prepared with skin, skin/coating eaten, fat not added in cooking	NA	NA
24107020	CHICKEN, COATED, BKD/FRD, PPD W/ SKIN, SKIN NOT EATEN	NA
24107021	Chicken, NS as to part, coated, baked or fried, prepared with skin, skin/coating not eaten, fat not added in cooking	NA	NA
24107040	CHICKEN, NS PART,COATED,BKD/FRD,PREP SKINLESS,NS COAT EATEN	NA
24107041	Chicken, NS as to part, coated, baked or fried, prepared skinless, NS as to coating eaten, fat not added in cooking	NA	NA
24107050	CHICKEN, NS PART,COATED,BKD/FRD,PREP SKINLESS,COATING EATEN	NA
24107051	Chicken, NS as to part, coated, baked or fried, prepared skinless, coating eaten, fat not added in cooking	NA	NA
24107060	CHICKEN, NS PART,COATED,BKD/FRD,PREP SKINLESS,COAT NOT EATEN	NA
24107061	Chicken, NS as to part, coated, baked or fried, prepared skinless, coating not eaten, fat not added in cooking	NA	NA
24107070	Chicken, NS as to part, fried, coated, skin / coating eaten	NA	NA
24107071	Chicken, NS as to part, fried, coated, skin / coating not eaten	NA	NA
24107080	Chicken, NS as to part, baked, coated, skin / coating eaten	NA	NA
24107081	Chicken, NS as to part, baked, coated, skin / coating not eaten	NA	NA
24120100	CHICKEN, BREAST, NFS	NA
24120110	CHICKEN, BREAST, NS AS TO COOKING METHOD, W/SKIN	NA
24120120	CHICKEN, BREAST, NS AS TO COOKING METHOD, W/O SKIN	NA
24122100	CHICKEN, BREAST, ROASTED/BROILED/BAKED, NS SKIN	NA
24122110	CHICKEN, BREAST, ROASTED/BROILED/BAKED, W/ SKIN	NA
24122120	CHICKEN, BREAST, ROASTED/BROILED/BAKED, W/O SKIN	NA
24122130	Chicken breast, baked, broiled, or roasted, skin eaten, from raw	NA	NA
24122131	Chicken breast, baked, broiled, or roasted, skin not eaten, from raw	NA	NA
24122140	Chicken breast, baked or broiled, skin eaten, from pre-cooked	NA	NA
24122141	Chicken breast, baked or broiled, skin not eaten, from pre-cooked	NA	NA
24122150	Chicken breast, baked or broiled, skin eaten, from fast food / restaurant	NA	NA
24122151	Chicken breast, baked or broiled, skin not eaten, from fast food / restaurant	NA	NA
24122160	Chicken breast, baked, broiled, or roasted with marinade, skin eaten, from raw	NA	NA
24122161	Chicken breast, baked, broiled, or roasted with marinade, skin not eaten, from raw	NA	NA
24122170	Chicken breast, rotisserie, skin eaten	NA	NA
24122171	Chicken breast, rotisserie, skin not eaten	NA	NA
24123100	CHICKEN, BREAST, STEWED, NS AS TO SKIN	NA
24123110	CHICKEN, BREAST, STEWED, W/ SKIN	NA
24123120	CHICKEN, BREAST, STEWED, W/O SKIN	NA
24123300	Chicken breast, grilled without sauce, skin eaten	NA	NA
24123301	Chicken breast, grilled without sauce, skin not eaten	NA	NA
24123310	Chicken breast, grilled with sauce, skin eaten	NA	NA
24123311	Chicken breast, grilled with sauce, skin not eaten	NA	NA
24124100	CHICKEN, BREAST, FRIED, NO COATING, NS AS TO SKIN	NA
24124101	Chicken, breast, fried, no coating, NS as to skin eaten, fat not added in cooking	NA	NA
24124110	CHICKEN, BREAST, FRIED, NO COATING, W/ SKIN	NA
24124111	Chicken, breast, fried, no coating, skin eaten, made with shortening	NA	NA
24124112	Chicken, breast, fried, no coating, skin eaten, made with butter	NA	NA
24124113	Chicken, breast, fried, no coating, skin eaten, made with oil	NA	NA
24124114	Chicken, breast, fried, no coating, skin eaten, made with cooking spray	NA	NA
24124115	Chicken, breast, fried, no coating, skin eaten, made without fat	NA	NA
24124120	CHICKEN, BREAST, FRIED, NO COATING, W/O SKIN	NA
24124121	Chicken, breast, fried, no coating, skin not eaten, made with shortening	NA	NA
24124122	Chicken, breast, fried, no coating, skin not eaten, made with butter	NA	NA
24124123	Chicken, breast, fried, no coating, skin not eaten, made with oil	NA	NA
24124124	Chicken, breast, fried, no coating, skin not eaten, made with cooking spray	NA	NA
24124125	Chicken, breast, fried, no coating, skin not eaten, made without fat	NA	NA
24124200	Chicken breast, sauteed, skin eaten	NA	NA
24124201	Chicken breast, sauteed, skin not eaten	NA	NA
24127100	CHICKEN, BREAST,COATED,BKD/FRD,PPD W/ SKIN,NS SKIN EATEN	NA
24127101	Chicken, breast, coated, baked or fried, prepared with skin, NS as to skin/coating eaten, fat not added in cooking	NA	NA
24127110	CHICKEN, BREAST,COATED,BKD/FRD,PPD W/ SKIN, SKIN EATEN	NA
24127111	Chicken, breast, coated, baked or fried, prepared with skin, skin/coating eaten, made with shortening	NA	NA
24127112	Chicken, breast, coated, baked or fried, prepared with skin, skin/coating eaten, made with butter	NA	NA
24127113	Chicken, breast, coated, baked or fried, prepared with skin, skin/coating eaten, made with oil	NA	NA
24127114	Chicken, breast, coated, baked or fried, prepared with skin, skin/coating eaten, made with cooking spray	NA	NA
24127115	Chicken, breast, coated, baked or fried, prepared with skin, skin/coating eaten, made without fat	NA	NA
24127119	Chicken, breast, coated, baked or fried, prepared with skin, skin/coating not eaten, made without fat	NA	NA
24127120	CHICKEN, BREAST,COATED,BKD/FRD,PPD W/ SKIN, SKIN NOT EATEN	NA
24127121	Chicken, breast, coated, baked or fried, prepared with skin, skin/coating not eaten, made with shortening	NA	NA
24127122	Chicken, breast, coated, baked or fried, prepared with skin, skin/coating not eaten, made with butter	NA	NA
24127123	Chicken, breast, coated, baked or fried, prepared with skin, skin/coating not eaten, made with oil	NA	NA
24127124	Chicken, breast, coated, baked or fried, prepared with skin, skin/coating not eaten, made with cooking spray	NA	NA
24127125	Chicken, breast, from fast food, coated, baked or fried, prepared with skin, NS as to skin/coating eaten	NA	NA
24127130	Chicken, breast, from fast food, coated, baked or fried, prepared with skin, skin/coating eaten	NA	NA
24127135	Chicken, breast, from fast food, coated, baked or fried, prepared with skin, skin/coating not eaten	NA	NA
24127140	CHICKEN,BREAST,COATED,BKD/FRD,PPD SKINLESS,NS COAT EATEN	NA
24127141	Chicken, breast, coated, baked or fried, prepared skinless, NS as to coating eaten, fat not added in cooking	NA	NA
24127150	CHICKEN,BREAST,COATED,BKD/FRD,PPD SKINLESS,COAT EATEN	NA
24127151	Chicken, breast, coated, baked or fried, prepared skinless, coating eaten, made with shortening	NA	NA
24127152	Chicken, breast, coated, baked or fried, prepared skinless, coating eaten, made with butter	NA	NA
24127153	Chicken, breast, coated, baked or fried, prepared skinless, coating eaten, made with oil	NA	NA
24127154	Chicken, breast, coated, baked or fried, prepared skinless, coating eaten, made with cooking spray	NA	NA
24127155	Chicken, breast, coated, baked or fried, prepared skinless, coating eaten, made without fat	NA	NA
24127160	CHICKEN,BREAST,COATED,BKD/FRD,PPD SKINLESS,COAT NOT EATEN	NA
24127161	Chicken, breast, coated, baked or fried, prepared skinless, coating not eaten, made with shortening	NA	NA
24127162	Chicken, breast, coated, baked or fried, prepared skinless, coating not eaten, made with butter	NA	NA
24127163	Chicken, breast, coated, baked or fried, prepared skinless, coating not eaten, made with oil	NA	NA
24127164	Chicken, breast, coated, baked or fried, prepared skinless, coating not eaten, made with cooking spray	NA	NA
24127165	Chicken, breast, coated, baked or fried, prepared skinless, coating not eaten, made without fat	NA	NA
24127200	Chicken breast, fried, coated, skin / coating eaten, from raw	NA	NA
24127201	Chicken breast, fried, coated, skin / coating not eaten, from raw	NA	NA
24127202	Chicken breast, fried, coated, prepared skinless, coating eaten, from raw	NA	NA
24127210	Chicken breast, fried, coated, skin / coating eaten, from pre-cooked	NA	NA
24127211	Chicken breast, fried, coated, skin / coating not eaten, from pre-cooked	NA	NA
24127220	Chicken breast, fried, coated, skin / coating eaten, from fast food / restaurant	NA	NA
24127221	Chicken breast, fried, coated, skin / coating not eaten, from fast food / restaurant	NA	NA
24127500	Chicken breast, baked, coated, skin / coating eaten	NA	NA
24127501	Chicken breast, baked, coated, skin / coating not eaten	NA	NA
24130200	CHICKEN, LEG, NFS	NA
24130210	CHICKEN, LEG, NS AS TO COOKING METHOD, W/ SKIN	NA
24130220	CHICKEN, LEG, NS AS TO COOKING METHOD, W/O SKIN	NA
24132200	CHICKEN, LEG, ROASTED/BROILED/BAKED, NS SKIN	NA
24132210	CHICKEN, LEG, ROASTED/BROILED/BAKED, W/ SKIN	NA
24132220	CHICKEN, LEG, ROASTED/BROILED/BAKED, W/O SKIN	NA
24132230	Chicken leg, drumstick and thigh, baked or broiled, skin eaten	NA	NA
24132231	Chicken leg, drumstick and thigh, baked or broiled, skin not eaten	NA	NA
24132240	Chicken leg, drumstick and thigh, rotisserie, skin eaten	NA	NA
24132241	Chicken leg, drumstick and thigh, rotisserie, skin not eaten	NA	NA
24133200	CHICKEN, LEG, STEWED, NS AS TO SKIN	NA
24133210	CHICKEN, LEG, STEWED, W/ SKIN	NA
24133220	CHICKEN, LEG, STEWED, W/O SKIN	NA
24134100	Chicken leg, drumstick and thigh, grilled without sauce, skin eaten	NA	NA
24134101	Chicken leg, drumstick and thigh, grilled without sauce, skin not eaten	NA	NA
24134150	Chicken leg, drumstick and thigh, grilled with sauce, skin eaten	NA	NA
24134151	Chicken leg, drumstick and thigh, grilled with sauce, skin not eaten	NA	NA
24134200	CHICKEN, LEG, FRIED, NO COATING, NS AS TO SKIN	NA
24134201	Chicken, leg (drumstick and thigh), fried, no coating, NS as to skin eaten, fat not added in cooking	NA	NA
24134210	CHICKEN, LEG, FRIED, NO COATING, W/ SKIN	NA
24134211	Chicken, leg (drumstick and thigh), fried, no coating, skin eaten, fat not added in cooking	NA	NA
24134220	CHICKEN, LEG, FRIED, NO COATING, W/O SKIN	NA
24134221	Chicken, leg (drumstick and thigh), fried, no coating, skin not eaten, fat not added in cooking	NA	NA
24134300	Chicken leg, drumstick and thigh, sauteed, skin eaten	NA	NA
24134301	Chicken leg, drumstick and thigh, sauteed, skin not eaten	NA	NA
24137200	CHICKEN,LEG,COATED,BKD/FRD,PPD W/SKIN,NS SKIN EATEN	NA
24137201	Chicken, leg (drumstick and thigh), coated, baked or fried, prepared with skin, NS as to skin/coating eaten, fat not added in cooking	NA	NA
24137210	CHICKEN, LEG,COATED,BKD/FRD,PPD W/ SKIN, SKIN EATEN	NA
24137211	Chicken, leg (drumstick and thigh), coated, baked or fried, prepared with skin, skin/coating eaten, fat not added in cooking	NA	NA
24137220	CHICKEN, LEG,COATED,BKD/FRD,PPD W/ SKIN, SKIN NOT EATEN	NA
24137221	Chicken, leg (drumstick and thigh), coated, baked or fried, prepared with skin, skin/coating not eaten, fat not added in cooking	NA	NA
24137240	CHICKEN,LEG,COATED,BKD/FRD,PPD SKINLESS,NS COAT EATEN	NA
24137241	Chicken, leg (drumstick and thigh), coated, baked or fried, prepared skinless, NS as to coating eaten, fat not added in cooking	NA	NA
24137250	CHICKEN,LEG,COATED,BKD/FRD,PPD SKINLESS,COAT EATEN	NA
24137251	Chicken, leg (drumstick and thigh), coated, baked or fried, prepared skinless, coating eaten, fat not added in cooking	NA	NA
24137260	CHICKEN,LEG,COATED,BKD/FRD,PPD SKINLESS,COAT NOT EATEN	NA
24137261	Chicken, leg (drumstick and thigh), coated, baked or fried, prepared skinless, coating not eaten, fat not added in cooking	NA	NA
24137300	Chicken leg, drumstick and thigh, fried, coated, skin / coating eaten	NA	NA
24137301	Chicken leg, drumstick and thigh, fried, coated, skin / coating not eaten	NA	NA
24137310	Chicken leg, drumstick and thigh, baked, coated, skin / coating eaten	NA	NA
24137311	Chicken leg, drumstick and thigh, baked, coated, skin / coating not eaten	NA	NA
24140200	CHICKEN, DRUMSTICK, NFS	NA
24140210	CHICKEN, DRUMSTICK, NS AS TO COOKING METHOD,W/ SKIN	NA
24140220	CHICKEN, DRUMSTICK, NS COOKING METHOD, W/O SKIN	NA
24142200	CHICKEN, DRUMSTICK, ROASTED/BROILED/BAKED, NS SKIN	NA
24142210	CHICKEN, DRUMSTICK, ROASTED/BROILED/BAKED, W/ SKIN	NA
24142220	CHICKEN, DRUMSTICK, ROASTED/BROILED/BAKED, W/O SKIN	NA
24142300	Chicken drumstick, baked, broiled, or roasted, skin eaten, from raw	NA	NA
24142301	Chicken drumstick, baked, broiled, or roasted, skin not eaten, from raw	NA	NA
24142310	Chicken drumstick, baked or broiled, skin eaten, from pre-cooked	NA	NA
24142311	Chicken drumstick, baked or broiled, skin not eaten, from pre-cooked	NA	NA
24142320	Chicken drumstick, baked or broiled, skin eaten, from fast food / restaurant	NA	NA
24142321	Chicken drumstick, baked or broiled, skin not eaten, from fast food / restaurant	NA	NA
24142400	Chicken drumstick, rotisserie, skin eaten	NA	NA
24142401	Chicken drumstick, rotisserie, skin not eaten	NA	NA
24142500	Chicken drumstick, grilled without sauce, skin eaten	NA	NA
24142501	Chicken drumstick, grilled without sauce, skin not eaten	NA	NA
24142510	Chicken drumstick, grilled with sauce, skin eaten	NA	NA
24142511	Chicken drumstick, grilled with sauce, skin not eaten	NA	NA
24143200	CHICKEN, DRUMSTICK, STEWED, NS AS TO SKIN	NA
24143210	CHICKEN, DRUMSTICK, STEWED, W/ SKIN	NA
24143220	CHICKEN, DRUMSTICK, STEWED, W/O SKIN	NA
24144200	CHICKEN, DRUMSTICK, FRIED, NO COATING,NS AS TO SKIN	NA
24144201	Chicken, drumstick, fried, no coating, NS as to skin eaten, fat not added in cooking	NA	NA
24144210	CHICKEN, DRUMSTICK, FRIED, NO COATING, W/ SKIN	NA
24144211	Chicken, drumstick, fried, no coating, skin eaten, made with shortening	NA	NA
24144212	Chicken, drumstick, fried, no coating, skin eaten, made with butter	NA	NA
24144213	Chicken, drumstick, fried, no coating, skin eaten, made with oil	NA	NA
24144214	Chicken, drumstick, fried, no coating, skin eaten, made with cooking spray	NA	NA
24144215	Chicken, drumstick, fried, no coating, skin eaten, made without fat	NA	NA
24144220	CHICKEN, DRUMSTICK, FRIED, NO COATING, W/O SKIN	NA
24144221	Chicken, drumstick, fried, no coating, skin not eaten, made with shortening	NA	NA
24144222	Chicken, drumstick, fried, no coating, skin not eaten, made with butter	NA	NA
24144223	Chicken, drumstick, fried, no coating, skin not eaten, made with oil	NA	NA
24144224	Chicken, drumstick, fried, no coating, skin not eaten, made with cooking spray	NA	NA
24144225	Chicken, drumstick, fried, no coating, skin not eaten, made without fat	NA	NA
24144300	Chicken drumstick, sauteed, skin eaten	NA	NA
24144301	Chicken drumstick, sauteed, skin not eaten	NA	NA
24147119	Chicken, drumstick, coated, baked or fried, prepared with skin, skin/coating not eaten, made without fat	NA	NA
24147200	CHICKEN,DRUMSTICK,COATED,BKD/FRD,PPD W/SKIN,NS SKIN EAT	NA
24147201	Chicken, drumstick, coated, baked or fried, prepared with skin, NS as to skin/coating eaten, fat not added in cooking	NA	NA
24147210	CHICKEN,DRUMSTICK,COATED,BKD/FRD,PPD W/SKIN, SKIN EAT	NA
24147211	Chicken, drumstick, coated, baked or fried, prepared with skin, skin/coating eaten, made with shortening	NA	NA
24147212	Chicken, drumstick, coated, baked or fried, prepared with skin, skin/coating eaten, made with butter	NA	NA
24147213	Chicken, drumstick, coated, baked or fried, prepared with skin, skin/coating eaten, made with oil	NA	NA
24147214	Chicken, drumstick, coated, baked or fried, prepared with skin, skin/coating eaten, made with cooking spray	NA	NA
24147215	Chicken, drumstick, coated, baked or fried, prepared with skin, skin/coating eaten, made without fat	NA	NA
24147220	CHICKEN,DRUMSTICK,COATED,BKD/FRD,PPD W/SKIN, SKIN NOT EAT	NA
24147221	Chicken, drumstick, coated, baked or fried, prepared with skin, skin/coating not eaten, made with shortening	NA	NA
24147222	Chicken, drumstick, coated, baked or fried, prepared with skin, skin/coating not eaten, made with butter	NA	NA
24147223	Chicken, drumstick, coated, baked or fried, prepared with skin, skin/coating not eaten, made with oil	NA	NA
24147224	Chicken, drumstick, coated, baked or fried, prepared with skin, skin/coating not eaten, made with cooking spray	NA	NA
24147225	Chicken, drumstick, from fast food, coated, baked or fried, prepared with skin, NS as to skin/coating eaten	NA	NA
24147230	Chicken, drumstick, from fast food, coated, baked or fried, prepared with skin, skin/coating eaten	NA	NA
24147235	Chicken, drumstick, from fast food, coated, baked or fried, prepared with skin, skin/coating not eaten	NA	NA
24147240	CHICKEN,DRUMSTICK,COATED,BKD/FRD,PPD SKINLESS,NS COAT EAT	NA
24147241	Chicken, drumstick, coated, baked or fried, prepared skinless, NS as to coating eaten, fat not added in cooking	NA	NA
24147250	CHICKEN,DRUMSTICK,COATED,BKD/FRD,PPD SKINLESS, COAT EAT	NA
24147251	Chicken, drumstick, coated, baked or fried, prepared skinless, coating eaten, made with shortening	NA	NA
24147252	Chicken, drumstick, coated, baked or fried, prepared skinless, coating eaten, made with butter	NA	NA
24147253	Chicken, drumstick, coated, baked or fried, prepared skinless, coating eaten, made with oil	NA	NA
24147254	Chicken, drumstick, coated, baked or fried, prepared skinless, coating eaten, made with cooking spray	NA	NA
24147255	Chicken, drumstick, coated, baked or fried, prepared skinless, coating eaten, made without fat	NA	NA
24147260	CHICKEN,DRUMSTICK,COATED,BKD/FRD,PPD SKINLESS, COAT NOT EAT	NA
24147261	Chicken, drumstick, coated, baked or fried, prepared skinless, coating not eaten, made with shortening	NA	NA
24147262	Chicken, drumstick, coated, baked or fried, prepared skinless, coating not eaten, made with butter	NA	NA
24147263	Chicken, drumstick, coated, baked or fried, prepared skinless, coating not eaten, made with oil	NA	NA
24147264	Chicken, drumstick, coated, baked or fried, prepared skinless, coating not eaten, made with cooking spray	NA	NA
24147265	Chicken, drumstick, coated, baked or fried, prepared skinless, coating not eaten, made without fat	NA	NA
24147300	Chicken drumstick, fried, coated, skin / coating eaten, from raw	NA	NA
24147301	Chicken drumstick, fried, coated, skin / coating not eaten, from raw	NA	NA
24147302	Chicken drumstick, fried, coated, prepared skinless, coating eaten, from raw	NA	NA
24147310	Chicken drumstick, fried, coated, skin / coating eaten, from pre-cooked	NA	NA
24147311	Chicken drumstick, fried, coated, skin / coating not eaten, from pre-cooked	NA	NA
24147320	Chicken drumstick, fried, coated, skin / coating eaten, from fast food / restaurant	NA	NA
24147321	Chicken drumstick, fried, coated, skin / coating not eaten, from fast food / restaurant	NA	NA
24147400	Chicken drumstick, baked, coated, skin / coating eaten	NA	NA
24147401	Chicken drumstick, baked, coated, skin / coating not eaten	NA	NA
24150200	CHICKEN, THIGH, NFS	NA
24150210	CHICKEN, THIGH, NS AS TO COOKING METHOD, W/ SKIN	NA
24150220	CHICKEN, THIGH, NS AS TO COOKING METHOD, W/O SKIN	NA
24152200	CHICKEN, THIGH, ROASTED/BROILED/BAKED, NS SKIN	NA
24152210	CHICKEN, THIGH, ROASTED/BROILED/BAKED, W/ SKIN	NA
24152220	CHICKEN, THIGH, ROASTED/BROILED/BAKED, W/O SKIN	NA
24152230	Chicken thigh, baked, broiled, or roasted, skin eaten, from raw	NA	NA
24152231	Chicken thigh, baked, broiled, or roasted, skin not eaten, from raw	NA	NA
24152240	Chicken thigh, baked or broiled, skin eaten, from pre-cooked	NA	NA
24152241	Chicken thigh, baked or broiled, skin not eaten, from pre-cooked	NA	NA
24152250	Chicken thigh, baked or broiled, skin eaten, from fast food / restaurant	NA	NA
24152251	Chicken thigh, baked or broiled, skin not eaten, from fast food / restaurant	NA	NA
24152300	Chicken thigh, rotisserie, skin eaten	NA	NA
24152301	Chicken thigh, rotisserie, skin not eaten	NA	NA
24153200	CHICKEN, THIGH, STEWED, NS AS TO SKIN	NA
24153210	CHICKEN, THIGH, STEWED, W/ SKIN	NA
24153220	CHICKEN, THIGH, STEWED, W/O SKIN	NA
24154010	Chicken thigh, grilled without sauce, skin eaten	NA	NA
24154011	Chicken thigh, grilled without sauce, skin not eaten	NA	NA
24154020	Chicken thigh, grilled with sauce, skin eaten	NA	NA
24154021	Chicken thigh, grilled with sauce, skin not eaten	NA	NA
24154200	CHICKEN, THIGH, FRIED, NO COATING, NS AS TO SKIN	NA
24154201	Chicken, thigh, fried, no coating, NS as to skin eaten, fat not added in cooking	NA	NA
24154210	CHICKEN, THIGH, FRIED, NO COATING, W/ SKIN	NA
24154211	Chicken, thigh, fried, no coating, skin eaten, made with shortening	NA	NA
24154212	Chicken, thigh, fried, no coating, skin eaten, made with butter	NA	NA
24154213	Chicken, thigh, fried, no coating, skin eaten, made with oil	NA	NA
24154214	Chicken, thigh, fried, no coating, skin eaten, made with cooking spray	NA	NA
24154215	Chicken, thigh, fried, no coating, skin eaten, made without fat	NA	NA
24154220	CHICKEN, THIGH, FRIED, NO COATING, W/O SKIN	NA
24154221	Chicken, thigh, fried, no coating, skin not eaten, made with shortening	NA	NA
24154222	Chicken, thigh, fried, no coating, skin not eaten, made with butter	NA	NA
24154223	Chicken, thigh, fried, no coating, skin not eaten, made with oil	NA	NA
24154224	Chicken, thigh, fried, no coating, skin not eaten, made with cooking spray	NA	NA
24154225	Chicken, thigh, fried, no coating, skin not eaten, made without fat	NA	NA
24154300	Chicken thigh, sauteed, skin eaten	NA	NA
24154301	Chicken thigh, sauteed, skin not eaten	NA	NA
24157119	Chicken, thigh, coated, baked or fried, prepared with skin, skin/coating not eaten, made without fat	NA	NA
24157200	CHICKEN,THIGH,COATED,BKD/FRD,PPD W/SKIN,NS SKIN EATEN	NA
24157201	Chicken, thigh, coated, baked or fried, prepared with skin, NS as to skin/coating eaten, fat not added in cooking	NA	NA
24157210	CHICKEN,THIGH,COATED,BKD/FRD,PPD W/SKIN, SKIN EATEN	NA
24157211	Chicken, thigh, coated, baked or fried, prepared with skin, skin/coating eaten, made with shortening	NA	NA
24157212	Chicken, thigh, coated, baked or fried, prepared with skin, skin/coating eaten, made with butter	NA	NA
24157213	Chicken, thigh, coated, baked or fried, prepared with skin, skin/coating eaten, made with oil	NA	NA
24157214	Chicken, thigh, coated, baked or fried, prepared with skin, skin/coating eaten, made with cooking spray	NA	NA
24157215	Chicken, thigh, coated, baked or fried, prepared with skin, skin/coating eaten, made without fat	NA	NA
24157220	CHICKEN,THIGH,COATED,BKD/FRD,PPD W/SKIN, SKIN NOT EATEN	NA
24157221	Chicken, thigh, coated, baked or fried, prepared with skin, skin/coating not eaten, made with shortening	NA	NA
24157222	Chicken, thigh, coated, baked or fried, prepared with skin, skin/coating not eaten, made with butter	NA	NA
24157223	Chicken, thigh, coated, baked or fried, prepared with skin, skin/coating not eaten, made with oil	NA	NA
24157224	Chicken, thigh, coated, baked or fried, prepared with skin, skin/coating not eaten, made with cooking spray	NA	NA
24157225	Chicken, thigh, from fast food, coated, baked or fried, prepared with skin, NS as to skin/coating eaten	NA	NA
24157230	Chicken, thigh, from fast food, coated, baked or fried, prepared with skin, skin/coating eaten	NA	NA
24157235	Chicken, thigh, from fast food, coated, baked or broiled, prepared with skin, skin/coating not eaten	NA	NA
24157240	CHICKEN,THIGH,COATED,BKD/FRD,PPD SKINLESS,NS COAT EATEN	NA
24157241	Chicken, thigh, coated, baked or fried, prepared skinless, NS as to coating eaten, fat not added in cooking	NA	NA
24157250	CHICKEN,THIGH,COATED,BKD/FRD,PPD SKINLESS, COAT EATEN	NA
24157251	Chicken, thigh, coated, baked or fried, prepared skinless, coating eaten, made with shortening	NA	NA
24157252	Chicken, thigh, coated, baked or fried, prepared skinless, coating eaten, made with butter	NA	NA
24157253	Chicken, thigh, coated, baked or fried, prepared skinless, coating eaten, made with oil	NA	NA
24157254	Chicken, thigh, coated, baked or fried, prepared skinless, coating eaten, made with cooking spray	NA	NA
24157255	Chicken, thigh, coated, baked or fried, prepared skinless, coating eaten, made without fat	NA	NA
24157260	CHICKEN,THIGH,COATED,BKD/FRD,PPD SKINLESS, COAT NOT EATEN	NA
24157261	Chicken, thigh, coated, baked or fried, prepared skinless, coating not eaten, made with shortening	NA	NA
24157262	Chicken, thigh, coated, baked or fried, prepared skinless, coating not eaten, made with butter	NA	NA
24157263	Chicken, thigh, coated, baked or fried, prepared skinless, coating not eaten, made with oil	NA	NA
24157264	Chicken, thigh, coated, baked or fried, prepared skinless, coating not eaten, made with cooking spray	NA	NA
24157265	Chicken, thigh, coated, baked or fried, prepared skinless, coating not eaten, made without fat	NA	NA
24157300	Chicken thigh, fried, coated, skin / coating eaten, from raw	NA	NA
24157301	Chicken thigh, fried, coated, skin / coating not eaten, from raw	NA	NA
24157302	Chicken thigh, fried, coated, prepared skinless, coating eaten, from raw	NA	NA
24157310	Chicken thigh, fried, coated, skin / coating eaten, from pre-cooked	NA	NA
24157311	Chicken thigh, fried, coated, skin / coating not eaten, from pre-cooked	NA	NA
24157320	Chicken thigh, fried, coated, skin / coating eaten, from fast food	NA	NA
24157321	Chicken thigh, fried, coated, skin / coating not eaten, from fast food	NA	NA
24157330	Chicken thigh, fried, coated, skin / coating eaten, from restaurant	NA	NA
24157331	Chicken thigh, fried, coated, skin / coating not eaten, from restaurant	NA	NA
[truncated: 8,789 more rows]

## Sheet: S2.6-HE_DTD_Stats
				Human Exposure (mg/kg/day)			DTD Exposure (g/day)
Spatial	Water	Prevalence	Subpopulation	Median	StD	95th Percentile	Median	StD	95th Percentile
US	GW	low	Total	3.26e-07	9.88186e-06	6.5732e-06	0.0009415	0.00196528	0.00494105
US	SW	low	Total	2.97e-07	9.04436e-06	3.5714e-06	0.000933	0.00195999	0.00489925
US	MX	low	Total	3.75e-07	5.43984e-06	8.1882e-06	0.0009475	0.0019535	0.0049131
US	GW	high	Total	3.57e-07	1.02526e-05	6.8193e-06	0.000985	0.00197606	0.004975
US	SW	high	Total	3.27e-07	9.44685e-06	3.8623e-06	0.000977	0.00197081	0.004966
US	MX	high	Total	4.15e-07	6.08523e-06	8.5631e-06	0.0009885	0.0019644	0.0049641
CA	GW	low	Total	3.57e-07	1.19874e-05	8.94555e-06	0.0009505	0.00197417	0.0049564
CA	SW	low	Total	2.71e-07	4.18562e-06	2.35225e-06	0.000932	0.00194802	0.00488715
CA	MX	low	Total	6.6e-07	6.05788e-06	1.17121e-05	0.000963	0.00195556	0.0049394
CA	GW	high	Total	3.92e-07	1.22945e-05	9.40045e-06	0.000996	0.00198491	0.0049932
CA	SW	high	Total	3e-07	4.9924e-06	2.54615e-06	0.000976	0.00195893	0.00493905
CA	MX	high	Total	7.17e-07	6.64361e-06	1.19603e-05	0.001004	0.00196646	0.00497115
US	GW	low	Products Only	2.51e-07	3.62328e-06	1.9551e-06	0.000873	0.00186904	0.0045894
US	SW	low	Products Only	2.55e-07	3.58437e-06	2.0059e-06	0.000892	0.00188298	0.0046776
US	MX	low	Products Only	2.45e-07	3.73937e-06	1.9202e-06	0.000853	0.0018368	0.004438
US	GW	high	Products Only	2.81e-07	4.34813e-06	2.1951e-06	0.000917	0.00187966	0.00468005
US	SW	high	Products Only	2.845e-07	4.30064e-06	2.20685e-06	0.000932	0.00189345	0.00473275
US	MX	high	Products Only	2.74e-07	4.49288e-06	2.1526e-06	0.000898	0.00184733	0.004492
CA	GW	low	Products Only	2.48e-07	3.70947e-06	1.9248e-06	0.00086	0.00185483	0.004484
CA	SW	low	Products Only	2.62e-07	4.13584e-06	2.0645e-06	0.00092	0.0019175	0.0048395
CA	MX	low	Products Only	2.29e-07	4.12045e-06	1.78e-06	0.000791	0.0018027	0.00420935
CA	GW	high	Products Only	2.77e-07	4.45672e-06	2.1624e-06	0.000906	0.00186516	0.0045638
CA	SW	high	Products Only	2.92e-07	4.96616e-06	2.239e-06	0.000964	0.00192829	0.00489
CA	MX	high	Products Only	2.56e-07	4.95576e-06	1.9659e-06	0.0008425	0.00181189	0.0042789
US	GW	low	Both	2.9495e-06	2.30299e-05	2.90944e-05	0.001417	0.00236067	0.0064383
US	SW	low	Both	1.899e-06	2.68553e-05	1.98342e-05	0.001466	0.00249334	0.0067225
US	MX	low	Both	3.881e-06	8.10966e-06	1.66836e-05	0.001344	0.00226831	0.0063069
US	GW	high	Both	2.984e-06	2.33889e-05	2.91295e-05	0.001459	0.00237248	0.00648
US	SW	high	Both	1.9325e-06	2.73048e-05	2.05744e-05	0.0015195	0.00250613	0.00672565
US	MX	high	Both	3.974e-06	8.81391e-06	1.67547e-05	0.001392	0.00228056	0.0063637
CA	GW	low	Both	3.308e-06	2.47096e-05	3.33166e-05	0.001381	0.0023219	0.0063111
CA	SW	low	Both	2.308e-06	5.21343e-06	1.51056e-05	0.001836	0.00288964	0.007855
CA	MX	low	Both	4.222e-06	7.05728e-06	1.70688e-05	0.001275	0.00212708	0.0058615
CA	GW	high	Both	3.395e-06	2.4966e-05	3.33202e-05	0.001417	0.00233445	0.0064647
CA	SW	high	Both	2.339e-06	5.25494e-06	1.51916e-05	0.001858	0.00290305	0.0078618
CA	MX	high	Both	4.274e-06	7.54783e-06	1.70862e-05	0.0013125	0.00214013	0.00592665
Table S2.5: Summary statisitics of human exposure and DTD released by factorial combination
Fig S2.5A. Estimated human exposure in absorbed dose (mg/kg day) to 1,4 dioxane in simulations across each factorial combination by geographic scale on the x-axis (with CA on left, US on right), water source (grouped by color, with Groundwater (GW)=blue, Surface water (SW)=green, and MXed (MX)=red), and Prevalenceproducts (grouped by color intensity, with High=dark, Low=light). Within spatial gro…
Fig S2.5B. Estimated down the drain mass released (g/day) of 1,4 dioxane in simulations across each factorial combination by geographic scale on the x-axis (with CA on left, US on right), water source (grouped by color, with Groundwater (GW)=blue, Surface water (SW)=green, and MXed (MX)=red), and Prevalenceproducts (grouped by color intensity, with High=dark, Low=light). Within spatial groups, co…

## Sheet: S2.7-AOV Analysis
A		Human Exposure
Population	Term	df	SS	MS	F statistic	Pvalue	partial η2
Total	Prevalenceproducts	1	66.24	66.24	91.181	<0.001	0.001
	Spatial Scale	1	159.656	159.656	219.77	<0.001	0.002
	Water Source	2	1790.89	895.447	1232.6	<0.001	0.02
	Scale: Water Source Interaction	2	389.183	194.591	267.859	<0.001	0.004
	Residuals	119993	87171.1	0.726
Products Only	Prevalenceproducts	1	75.604	75.604	128.634	<0.001	0.001
	Residuals	98696	58007.8	0.588
Both	Prevalenceproducts	1	0.361	0.361	1.522	0.217	<0.001
	Spatial Scale	1	37.026	37.026	155.969	<0.001	0.007
	Water Source	2	124.145	62.073	261.477	<0.001	0.024
	Scale: Water Source Interaction	2	0.516	0.258	1.086	0.338	<0.001
	Residuals	21295	5055.26	0.237
B
Population	Term	df	SS	MS	F statistic	Pvalue	partial η2
Total	Prevalenceproducts	1	56.396	56.396	56.677	< .001	<0.001
	Spatial Scale	1	4.958	4.958	4.983	0.026	<0.001
	Water Source	2	62.762	31.381	31.537	< .001	0.001
	Scale: Water Source Interaction	2	14.981	7.49	7.528	0.001	<0.001
	Residuals	119993	119400	0.995
Products Only	Prevalenceproducts	1	59.038	59.038	52.893	< .001	0.001
	Residuals	98696	110200	1.116
Both	Prevalenceproducts	1	1.651	1.651	5.006	0.025	<0.001
	Spatial Scale	1	0.006	0.006	0.018	0.894	<0.001
	Water Source	2	0.314	0.157	0.477	0.621	<0.001
	Scale: Water Source Interaction	2	1.902	0.951	2.883	0.056	<0.001
	Residuals	21295	7023.75	0.33
Table S2.6: AOV analyses of Human Exposure (A) and DTD released (B).

## Sheet: S2.8-ExposureDTDProportion
				Human Exposure Proportion from Contaminated Water			DTD Mass Released from Product Use
Spatial	Water	Prevalence	Subpopulation	Median	StD	95% Quantile	Median	StD	95% Quantile
US	GW	low	Total	0	0.292203	0.938123	1	0.125064	1
US	SW	low	Total	0	0.218027	0.744075	1	0.0898081	1
US	MX	low	Total	0	0.350253	0.971593	1	0.148314	1
US	GW	high	Total	0	0.289202	0.932615	1	0.12118	1
US	SW	high	Total	0	0.215097	0.717842	1	0.0867031	1
US	MX	high	Total	0	0.347096	0.967676	1	0.143229	1
CA	GW	low	Total	0	0.333961	0.968491	1	0.14576	1
CA	SW	low	Total	0	0.111262	0	1	0.0445366	1
CA	MX	low	Total	0	0.427006	0.988294	1	0.200381	1
CA	GW	high	Total	0	0.330869	0.965869	1	0.141541	1
CA	SW	high	Total	0	0.109771	0	1	0.0431742	1
CA	MX	high	Total	0	0.423701	0.986671	1	0.193423	1
US	GW	low	Both	0.873089	0.252763	0.998296	0.95406	0.281247	0.994696
US	SW	low	Both	0.7686	0.289512	0.997438	0.975278	0.2625	0.997477
US	MX	low	Both	0.900317	0.205694	0.998148	0.942211	0.278	0.989162
US	GW	high	Both	0.864495	0.25817	0.998038	0.956104	0.273821	0.99499
US	SW	high	Both	0.748846	0.293321	0.996925	0.976244	0.254656	0.997564
US	MX	high	Both	0.890939	0.210748	0.997595	0.944729	0.269773	0.989253
CA	GW	low	Both	0.893172	0.240973	0.998361	0.940484	0.281531	0.991937
CA	SW	low	Both	0.812287	0.238929	0.99746	0.975	0.275042	0.99472
CA	MX	low	Both	0.914318	0.196522	0.998073	0.928151	0.280384	0.983952
CA	GW	high	Both	0.88525	0.246501	0.998007	0.942114	0.274667	0.992168
CA	SW	high	Both	0.800613	0.243528	0.997079	0.976157	0.268219	0.99475
CA	MX	high	Both	0.906669	0.201826	0.99762	0.930467	0.27183	0.984209
Table S2.7: Summary statisitics of the proportion of human exposure and due to contaminated water and mass released down the drain due to consumer produce use

## Sheet: S2.9-Beta Regress Analysis
A1
Human Exposure
	Estimate	Std. Error	Z value	p-value
Intercept	1.22164	0.01917	63.74	<0.001
Prevalence	0.04856	0.01474	3.295	<0.001
Spatial	-0.07886	0.02601	-3.032	0.0024
Water: MX	0.12035	0.02098	5.737	<0.001
Water: SW	-0.28843	0.05512	-5.232	<0.001
CA-GW: US-MX	0.01835	0.03313	0.554	0.57961
CA-GW: US-SW	-0.04433	0.06353	-0.698	0.485307
Phi coefficient	2.26536	0.02136	106	<0.001
A2
Variable	Level 1	Level 2	Cohen's D	95% CI: Lower	95%CI: Upper
Prevalence	High	Low	-0.0417046	-0.0685647	-0.0148436
Spatial	CA	US	0.190859	0.16366	0.218053
Water	GW	SW	0.356168	0.30874	0.403576
	GW	MX	-0.238119	-0.267707	-0.208524
	MX	SW	0.663807	0.618517	0.709075
B1
DTD Mass Released
	Estimate	Std. Error	Z value	p-value
Intercept	1.01191	0.020733	48.807	<0.001
Prevalence	-0.033112	0.015994	-2.07	0.038425
Spatial	0.09619	0.028159	3.416	<0.001
Water: MX	-0.100075	0.022813	-4.387	<0.001
Water: SW	0.263065	0.059125	4.449	<0.001
SpatialUS:WaterMX	-0.004105	0.035936	-0.114	0.909053
SpatialUS:WaterSW	-0.047703	0.068157	-0.7	0.483993
Phi coefficient	1.39261	0.01238	112.5	<0.001
B2
Variable	Level 1	Level 2	Cohen's D	95% CI: Lower	95%CI: Upper
Prevalence	High	Low	0.0288597	0.00200028	0.0557184
Spatial	CA	US	-0.0864879	-0.113636	-0.0593379
Water	GW	SW	-0.153628	-0.200816	-0.106433
	GW	MX	0.0508041	0.0213043	0.0803026
	MX	SW	-0.205348	-0.25003	-0.16066
Table S2.8: Beta regression analyses of the proportion of human exposure due to contaminated water (A) and the proportion of mass released DTD due to the use of consumer products (B). Included are results from each Beta regression model (1), as well as Cohen's D metrics of effect size (2).

## Sheet: S2.10-Model Evaluation
Space	Water	Prevalence	Subpopulation	Median	SD	Q95	Median Magnitude Difference	95th Percentile Magnitude Difference
CA	Empirical		Total	0.65	0.618473	1.8995
US	Empirical		Total	1.125	0.601835	1.9075
CA	GW	high	Both	4.34256	1.77087	7.64816	6.68087	4.02641
CA	GW	high	Products Only	2.77654	1.13226	4.89007	4.27161	2.5744
CA	GW	high	Total	3.05236	1.24473	5.37584	4.69594	2.83013
CA	GW	low	Both	4.23224	1.72588	7.45385	6.51113	3.92411
CA	GW	low	Products Only	2.63557	1.07477	4.64179	4.05473	2.44369
CA	GW	low	Total	2.91292	1.18787	5.13026	4.48141	2.70085
CA	MX	high	Both	4.02231	1.64027	7.08413	6.18817	3.72947
CA	MX	high	Products Only	2.58194	1.0529	4.54733	3.97222	2.39396
CA	MX	high	Total	3.07688	1.25473	5.41902	4.73366	2.85287
CA	MX	low	Both	3.90739	1.59341	6.88172	6.01137	3.62291
CA	MX	low	Products Only	2.42411	0.988536	4.26937	3.7294	2.24763
CA	MX	low	Total	2.95123	1.20349	5.19772	4.54035	2.73636
CA	SW	high	Both	5.69406	2.322	10.0284	8.76009	5.27951
CA	SW	high	Products Only	2.95429	1.20474	5.20312	4.54506	2.73921
CA	SW	high	Total	2.99107	1.21974	5.26789	4.60164	2.7733
CA	SW	low	Both	5.62664	2.2945	9.90968	8.65637	5.21699
CA	SW	low	Products Only	2.81945	1.14975	4.96564	4.33761	2.61418
CA	SW	low	Total	2.85622	1.16475	5.0304	4.39419	2.64828
US	GW	high	Both	3.59449	2.09999	7.97805	3.1951	4.18247
US	GW	high	Products Only	2.25918	1.31987	5.01431	2.00816	2.62873
US	GW	high	Total	2.42671	1.41774	5.38614	2.15708	2.82367
US	GW	low	Both	3.49102	2.03954	7.74839	3.10313	4.06207
US	GW	low	Products Only	2.15078	1.25654	4.77371	1.91181	2.5026
US	GW	low	Total	2.31954	1.35513	5.14828	2.06182	2.69897
US	MX	high	Both	3.42943	2.00355	7.61169	3.04838	3.9904
US	MX	high	Products Only	2.21237	1.29252	4.91041	1.96655	2.57427
US	MX	high	Total	2.43534	1.42278	5.40528	2.16474	2.8337
US	MX	low	Both	3.31117	1.93447	7.34921	2.94326	3.8528
US	MX	low	Products Only	2.10151	1.22775	4.66435	1.86801	2.44527
US	MX	low	Total	2.33433	1.36377	5.18109	2.07496	2.71617
US	SW	high	Both	3.74354	2.18707	8.30888	3.32759	4.3559
US	SW	high	Products Only	2.29614	1.34146	5.09633	2.04101	2.67173
US	SW	high	Total	2.407	1.40623	5.3424	2.13956	2.80073
US	SW	low	Both	3.61174	2.11006	8.01633	3.21043	4.20253
US	SW	low	Products Only	2.19759	1.28389	4.8776	1.95341	2.55707
US	SW	low	Total	2.2986	1.3429	5.1018	2.0432	2.6746
Table S2.9: Summary statisitics of projected wastewater concentrations based on empirical vs. modeled data
Fig. S2.9.1: Distribution of 1,4-dioxane concentrations collected in monitoring samples and projected wastewater effluent concentrations based on mass released DTD concentrations for the Total Population. Monitoring samples collected at the US and CA scale. Effluent projections were made by extrapolating median concentrations for each factorial group to database of wastewater treatment plants in …
Fig. S2.9.2: Distribution of 1,4-dioxane concentrations collected in monitoring samples and projected wastewater effluent concentrations based on mass released DTD concentrations for the Product's Only Population. Monitoring samples collected at the US and CA scale. Effluent projections were made by extrapolating median concentrations for each factorial group to database of wastewater treatment p…
Fig. S2.9.3: Distribution of 1,4-dioxane concentrations collected in monitoring samples and projected wastewater effluent concentrations based on mass released DTD concentrations for the Both Population. Monitoring samples collected at the US and CA scale. Effluent projections were made by extrapolating median concentrations for each factorial group to database of wastewater treatment plants in t…

[truncated: 1 more sheets: S2.11-Inh. Abs. assessment]
